# Supplementary material for: Loss of Ena/VASP interferes with lamellipodium architecture, motility and integrin-dependent adhesion
Source: eLife. 2020 May 11;9:e55351. doi: 10.7554/eLife.55351 (PMC7239657; doi:10.7554/eLife.55351)
Supplement: Figure 1—figure supplement 2—source data 1. [file elife-55351-fig1-figsupp2-data1.xlsx]

## Sheet: Sheet1
Source Data Figure 1-figure supplement 2			Figure 1-figure supplement 2. Loss of Ena/VASP proteins affects migration and directionality
Figure 1- figure supplement 2A								Figure 1- figure supplement 2B
Turning angle frequency in %								MSD in µm²
Cell line	VASP rescue		Evl rescue		Mena rescue			Cell line	B16-F1	SEM	EVM-KO	SEM	VASP rescue	SEM	Evl rescue	SEM	Mena rescue	SEM
Turning angle	sum	relative	sum	relative	sum	relative		Time in min
-180	63	1.88285	53	1.42857	27	1.02857		0	0	0	0	0	0	0	0	0	0	0
-170	50	1.49432	38	1.02426	15	0.571429		5	17.278	2.696	75.046	46.037	13.364	1.835	7.531	1.502	6.387	1.373
-160	38	1.13568	34	0.916442	15	0.571429		10	59.761	7.604	111.899	63.844	35.211	5.08	19.366	3.464	17.748	3.237
-150	44	1.315	42	1.13208	15	0.571429		15	123.854	14.251	134.067	72.065	69.068	10.244	36.682	6.528	37.704	7.186
-140	0	1.88285	43	1.15903	20	0.761905		20	210.262	21.65	153.036	77.2	110.531	15.868	61.889	10.607	64.081	12.924
-130	61	1.82307	42	1.13208	21	0.8		25	313.403	28.839	171.932	80.928	161.192	21.782	87.871	14.294	91.924	18.753
-120	52	1.55409	36	0.97035	13	0.495238		30	428.825	36.951	193.379	84.004	217.74	27.213	118.402	18.41	119.483	23.413
-110	58	1.73341	44	1.18598	24	0.914286		35	552.617	45.303	218.441	87.216	277.348	32.725	153.125	23.457	148.787	28.312
-100	46	1.37478	40	1.07817	38	1.44762		40	677.789	53.663	245.493	90.013	339.024	38.247	196.296	30	182.726	33.482
-90	149	4.45308	181	4.87871	78	2.97143		45	800.895	61.472	274.841	92.677	403.028	43.633	241.949	37.672	223.08	39.98
-80	95	2.83921	87	2.34501	21	0.8		50	920.878	68.946	305.861	95.063	467.599	49.218	287.241	45.365	268.509	47.569
-70	88	2.63001	86	2.31806	61	2.32381		55	1035.62	75.196	338.741	97.523	530.05	55.269	328.408	52.632	320.037	57.011
-60	133	3.9749	87	2.34501	40	1.52381		60	1147.72	81.122	373.181	100.04	597.73	61.565	371.794	59.96	373.173	66.7
-50	142	4.24387	140	3.77358	64	2.4381		65	1259.5	87.063	409.989	104.4	670.402	68.468	414.031	66.84	428.385	77.786
-40	146	4.36342	132	3.55795	116	4.41905		70	1371.91	92.97	446.93	109.161	749.543	76.009	458.186	72.816	486.373	91.306
-30	202	6.03706	198	5.33693	93	3.54286		75	1485.91	99.328	483.42	113.969	829.973	83.616	503.333	78.08	543.673	106.267
-20	260	7.77047	216	5.8221	128	4.87619		80	1610.67	106.889	519.445	118.38	918.585	91.301	550.55	83.226	601.203	121.898
-10	209	6.24626	190	5.12129	199	7.58095		85	1738.15	114.552	554.547	122.418	1005.11	99.304	599.315	88.023	658.275	136.758
0	395	11.8051	495	13.3423	467	17.7905		90	1864.07	121.829	589.245	126.119	1092.18	107.549	652.523	92.737	712.581	150.084
10	272	8.12911	226	6.09164	157	5.98095		95	1990.11	128.777	623.416	129.555	1177.07	115.643	705.266	97.582	764.029	162.17
20	174	5.20024	166	4.47439	185	7.04762		100	2112.68	135.693	656.838	132.77	1261.17	123.443	757.483	102.592	815.872	174.422
30	144	4.30365	126	3.39623	131	4.99048		105	2234.4	143.019	689.461	135.901	1344.13	130.972	810.881	108.053	864.983	186.511
40	124	3.70592	149	4.01617	84	3.2		110	2353.74	150.236	722.202	138.878	1425.36	138.319	864.666	113.918	912.305	198.17
50	91	2.71967	95	2.56065	88	3.35238		115	2473.77	157.396	755.481	141.632	1505.09	145.367	918.584	120.063	959.099	209.491
60	90	2.68978	101	2.72237	74	2.81905		120	2593.32	164.594	789.198	144.227	1582.35	152.557	969.741	125.951	1006.35	220.354
70	105	3.13808	94	2.53369	51	1.94286		125	2710.99	172.15	822.725	146.721	1661.13	159.791	1019.76	131.363	1053.46	229.813
80	64	1.91273	41	1.10512	59	2.24762		130	2827.56	179.787	856.137	148.971	1741.68	167.188	1070.89	136.47	1100.23	238.058
90	97	2.89898	157	4.23181	93	3.54286		135	2946.89	187.5	889.583	151.185	1824.91	174.799	1123.05	141.722	1152.9	248.581
100	57	1.70353	52	1.40162	25	0.952381		140	3066.62	195.458	923.76	153.321	1910.54	183.242	1176.15	147.195	1209.58	260.615
110	63	1.88285	52	1.40162	40	1.52381		145	3192.89	204.078	957.996	155.438	1997.27	192.158	1230.13	152.743	1268.95	274.086
120	44	1.315	44	1.18598	28	1.06667		150	3323.55	212.891	991.694	157.549	2082.7	200.645	1281.72	158.061	1336.6	288.415
130	48	1.43455	48	1.2938	26	0.990476		155	3454.43	221.561	1025.41	159.663	2165.94	208.877	1330.77	163.415	1411.71	303.2
140	33	0.986252	28	0.754717	34	1.29524		160	3584.22	230.032	1059	161.811	2248.36	216.869	1380.39	169.069	1495.36	319.465
150	53	1.58398	48	1.2938	14	0.533333		165	3714.23	238.316	1092.09	163.908	2329.66	224.608	1431.77	174.987	1585.93	337.622
160	48	1.43455	50	1.34771	22	0.838095		170	3840.79	246.376	1124.85	166.023	2410.55	232.111	1485.92	181.287	1686.44	358.581
170	34	1.01614	19	0.512129	22	0.838095		175	3966.48	254.037	1157.32	168.123	2489.03	239.397	1543.6	187.754	1793.02	384.296
180	24	0.717274	30	0.808625	37	1.40952		180	4091.82	261.289	1189.22	170.04	2568.65	246.69	1613.05	194.1	1900.04	413.162
