# Supplementary material for: Loss of Ena/VASP interferes with lamellipodium architecture, motility and integrin-dependent adhesion
Source: eLife. 2020 May 11;9:e55351. doi: 10.7554/eLife.55351 (PMC7239657; doi:10.7554/eLife.55351)
Supplement: Figure 1—figure supplement 3—source data 1. [file elife-55351-fig1-figsupp3-data1.xlsx]

## Sheet: Sheet1
Source Data Figure 1-figure supplement 3		Figure 1-figure supplement 3. Loss of Ena/VASP-proteins does not affect invasion of B16-F1 cells
Figure 1-figure supplement 3B
Invasion speed (µm/h)
Statistics see below dataset
Cell line	B16-F1	EVM-KO
Mean	3.073	3.438
Median	3.024	3.426
SD	0.349	0.738
SEM	0.201	0.426
25 % Percentil	2.819	2.886
75 % Percentil	3.338	3.993
C.I. of mean	0.866	1.834
n	3	3
	3.44324	3.42649
	2.75082	2.70541
	3.02394	4.18169
Statistics	p-value
Mann-Whitney rank sum test	n.s.
B16-F1 vs EVM-KO	1
