# Supplementary material for: Loss of Ena/VASP interferes with lamellipodium architecture, motility and integrin-dependent adhesion
Source: eLife. 2020 May 11;9:e55351. doi: 10.7554/eLife.55351 (PMC7239657; doi:10.7554/eLife.55351)
Supplement: Figure 1—source data 1. [file elife-55351-fig1-data1.xlsx]

## Sheet: Sheet1
Source data Figure 1	Figure 1. Loss of Ena/VASP-proteins impairs cell migration in B16-F1 cells
Figure 1 B									Figure 1 C						Figure 1 D										Figure 1 E							Figure 1 F							Figure 1 G
Cell speed in µm/min									Directionality index						relative turning angle freuency in %										Cell speed in µm/min							Directionality index d/D							MSD in µm²
Statistics see below dataset									Statistics see below dataset																Statistics see below dataset							Statistics see below dataset
Cell line	B16-F1	E-KO #23	E-KO #27	EV-KO #23	EV-KO #27	EVM-KO #23	EVM-KO #27		Cell line	B16-F1	E-KO #23	EV-KO #23	EVM-KO #23		Cell line	B16-F1		E-KO #23		EV-KO #23		EVM-KO #23			Cell line	B16-F1	EVM-KO	VASP rescue	Evl rescue	Mena rescue		Cell line	B16-F1	EVM-KO	VASP rescue	Evl rescue	Mena rescue		Cell line	B16-F1	SEM	E-KO	SEM	EV-KO	SEM	EVM-KO	SEM
Mean	1.43637	1.25445	1.18372	0.618127	0.566245	0.470077	0.426904		Mean	0.324466	0.421947	0.428491	0.474308		Turning angle	sum	relative (%)	sum	relative (%)	sum	relative (%)	sum	relative (%)		Mean	0.324466	0.421947	0.309985	0.293499	0.334735		Mean	0.324466	0.421947	0.309985	0.293499	0.334735		Time in min
Median	1.41	1.235	1.14	0.572	0.526	0.456	0.381		Median	0.3261	0.4169	0.4121	0.482		-180	71	1.01429	40	0.637044	70	1.6033	80	1.75824		Median	1.41	0.456	1.092	0.7975	0.8102		Median	0.3261	0.4167	0.2937	0.2806	0.308		0	0	0	0	0	0	0	0	0
SD	0.402957	0.371569	0.467694	0.253866	0.268423	0.186508	0.221242		SD	0.156448	0.170195	0.198856	0.237835		-170	62	0.885714	44	0.700749	44	1.00779	41	0.901099		SD	0.156448	0.170195	0.14806	0.170381	0.206243		SD	0.156448	0.170195	0.14806	0.170381	0.206243		5	17.278	2.696	8.54	0.922	7.067	1.475	75.046	46.037
SEM	0.02835	0.03075	0.03857	0.02262	0.02245	0.01636	0.02072		SEM	0.01101	0.01409	0.01772	0.02086		-160	74	1.05714	60	0.955566	23	0.526798	44	0.967033		SEM	0.02835	0.01636	0.02917	0.04106	0.05377		SEM	0.01101	0.01409	0.01412	0.01655	0.02381		10	59.761	7.604	23.281	2.607	19.89	4.397	111.899	63.844
25 % Percentil	1.125	0.9788	0.864	0.4435	0.375	0.3115	0.2723		25 % Percentil	0.1847	0.3142	0.2744	0.2649		-150	69	0.985714	48	0.764453	27	0.618415	26	0.571429		25 % Percentil	1.125	0.3115	0.8145	0.4578	0.555		25 % Percentil	0.1847	0.3142	0.2228	0.1475	0.1537		15	123.854	14.251	49.004	5.349	39.032	7.843	134.067	72.065
75 % Percentil	1.707	1.511	1.399	0.735	0.717	0.5833	0.5413		75 % Percentil	0.4516	0.5353	0.5632	0.6619		-140	58	0.828571	40	0.637044	0	0	55	1.20879		75 % Percentil	1.707	0.5833	1.377	1.176	1.101		75 % Percentil	0.4516	0.5353	0.3969	0.4142	0.4532		20	210.262	21.65	86.9	9.401	65.833	12.616	153.036	77.2
C.I. of the mean	0.0559	0.0608	0.0762	0.0448	0.0444	0.0324	0.0411		C.I. of the mean	0.0217	0.0278	0.0351	0.0413		-130	73	1.04286	57	0.907788	25	0.572607	36	0.791209		C.I. of the mean	0.0559	0.0324	0.0575	0.0814	0.107		C.I. of the mean	0.0217	0.0278	0.028	0.0328	0.0358		25	313.403	28.839	138.104	14.465	99.439	18.409	171.932	80.928
n	202	146	147	126	143	130	114		n	202	146	126	130		-120	79	1.12857	43	0.684822	33	0.755841	39	0.857143		n	202	146	110	106	75		n	202	146	110	106	75		30	428.825	36.951	202.346	20.355	140.144	24.278	193.379	84.004
	0.569	1.405	2.03	0.694	1.179	0.388	0.553			0.0382	0.2319	0.4801	0.5838		-110	78	1.11429	60	0.955566	36	0.824553	47	1.03297			0.0382	0.2319	0.2692	0.5187	0.3232			0.0382	0.2319	0.2692	0.5187	0.3232		35	552.617	45.303	280.454	26.762	185.936	30.492	218.441	87.216
	0.912	1.184	1.441	0.416	0.864	0.26	0.342			0.1084	0.5708	0.8323	0.3422		-100	83	1.18571	55	0.875936	18	0.412277	20	0.43956			0.1084	0.5708	0.3072	0.1477	0.3621			0.1084	0.5708	0.3072	0.1477	0.3621		40	677.789	53.663	367.938	33.142	235.297	37.624	245.493	90.013
	1.514	1.784	1.571	0.658	0.392	0.446	0.379			0.3342	0.7033	0.1546	0.4844		-90	169	2.41429	152	2.42077	156	3.57306	240	5.27473			0.3342	0.7033	0.4007	0.4907	0.334			0.3342	0.7033	0.4007	0.4907	0.334		45	800.895	61.472	465.755	39.609	285.118	44.458	274.841	92.677
	1.06	0.877	1.306	0.572	0.351	0.415	0.288			0.2845	0.344	0.3474	0.0861		-80	154	2.2	127	2.02262	72	1.64911	111	2.43956			0.2845	0.344	0.0133	0.2107	0.308			0.2845	0.344	0.0133	0.2107	0.308		50	920.878	68.946	571.069	46.373	335.271	50.882	305.861	95.063
	1.447	1.73	0.689	0.502	0.241	0.191	0.393			0.3986	0.4192	0.5418	0.1732		-70	195	2.78571	125	1.99076	85	1.94686	107	2.35165			0.3986	0.4192	0.2213	0.3494	0.4532			0.3986	0.4192	0.2213	0.3494	0.4532		55	1035.62	75.196	681.435	53.669	385.566	56.401	338.741	97.523
	1.513	1.646	1.14	0.502	0.483	0.798	0.212			0.0206	0.6091	0.3839	0.3347		-60	204	2.91429	161	2.5641	108	2.47366	92	2.02198			0.0206	0.6091	0.2749	0.288	0.5104			0.0206	0.6091	0.2749	0.288	0.5104		60	1147.72	81.122	792.684	61.092	437.485	61.464	373.181	100.04
	1.731	1.592	0.713	0.506	0.942	0.326	0.516			0.1745	0.2533	0.2797	0.2567		-50	269	3.84286	233	3.71078	209	4.78699	270	5.93407			0.1745	0.2533	0.3535	0.1086	0.2759			0.1745	0.2533	0.3535	0.1086	0.2759		65	1259.5	87.063	906.057	68.951	490.296	65.868	409.989	104.4
	1.062	1.131	1.11	0.221	0.286	0.312	0.703			0.1631	0.4899	0.498	0.5013		-40	325	4.64286	305	4.85746	204	4.67247	152	3.34066			0.1631	0.4899	0.5949	0.5097	0.1879			0.1631	0.4899	0.5949	0.5097	0.1879		70	1371.91	92.97	1019.38	77.158	542.472	69.79	446.93	109.161
	1.482	1.851	1.542	0.489	0.488	0.451	0.314			0.3265	0.3831	0.2711	0.2647		-30	406	5.8	437	6.95971	271	6.20705	233	5.12088			0.3265	0.3831	0.3544	0.5297	0.0565			0.3265	0.3831	0.3544	0.5297	0.0565		75	1485.91	99.328	1132.27	85.812	594.489	73.557	483.42	113.969
	1.288	0.362	2.365	0.556	0.436	0.562	0.573			0.1329	0.035	0.0459	0.4475		-20	535	7.64286	546	8.69565	347	7.94778	306	6.72527			0.1329	0.035	0.1876	0.477	0.7593			0.1329	0.035	0.1876	0.477	0.7593		80	1610.67	106.889	1242.92	94.603	645.421	77.304	519.445	118.38
	1.612	1.098	0.936	0.486	0.912	0.273	0.262			0.288	0.477	0.3921	0.2738		-10	529	7.55714	515	8.20194	266	6.09253	196	4.30769			0.288	0.477	0.243	0.136	0.5867			0.288	0.477	0.243	0.136	0.5867		85	1738.15	114.552	1351.93	103.219	694.104	80.961	554.547	122.418
	1.179	1.644	0.906	0.635	0.289	0.484	0.28			0.3734	0.4399	0.5796	0.6605		0	711	10.1571	771	12.279	704	16.1246	768	16.8791			0.3734	0.4399	0.4374	0.2167	0.3372			0.3734	0.4399	0.4374	0.2167	0.3372		90	1864.07	121.829	1460.45	111.802	741.687	84.572	589.245	126.119
	1.644	1.224	1.328	0.227	0.636	0.511	0.336			0.1129	0.3254	0.3749	0.8753		10	516	7.37143	512	8.15416	312	7.14613	286	6.28571			0.1129	0.3254	0.3339	0.3393	0.1336			0.1129	0.3254	0.3339	0.3393	0.1336		95	1990.11	128.777	1570.74	120.324	789.263	88.22	623.416	129.555
	2.155	1.215	1.459	0.507	0.465	0.484	0.438			0.2022	0.7182	0.2207	0.4919		20	396	5.65714	374	5.95636	226	5.17636	226	4.96703			0.2022	0.7182	0.2275	0.1823	0.1784			0.2022	0.7182	0.2275	0.1823	0.1784		100	2112.68	135.693	1681.16	128.998	837.584	91.918	656.838	132.77
	1.716	1.83	0.839	0.372	0.555	0.294	0.561			0.4721	0.3215	0.7163	0.2104		30	329	4.7	281	4.47523	183	4.19148	137	3.01099			0.4721	0.3215	0.331	0.1556	0.0735			0.4721	0.3215	0.331	0.1556	0.0735		105	2234.4	143.019	1793.38	138.755	885.358	95.443	689.461	135.901
	0.708	1.088	0.845	0.5	0.648	0.627	0.532			0.2257	0.2002	0.8134	0.3433		40	277	3.95714	229	3.64708	193	4.42052	216	4.74725			0.2257	0.2002	0.3108	0.1966	0.1371			0.2257	0.2002	0.3108	0.1966	0.1371		110	2353.74	150.236	1906.9	149.471	931.512	99.007	722.202	138.878
	0.925	0.979	1.321	0.655	0.657	0.247	0.283			0.5408	0.4249	0.591	0.265		50	224	3.2	154	2.45262	96	2.19881	70	1.53846			0.5408	0.4249	0.2745	0.2388	0.1366			0.5408	0.4249	0.2745	0.2388	0.1366		115	2473.77	157.396	2017.53	159.83	978.384	102.737	755.481	141.632
	1.225	1.297	0.744	0.321	0.351	0.267	0.383			0.4171	0.3857	0.2663	0.8109		60	171	2.44286	120	1.91113	105	2.40495	91	2			0.4171	0.3857	0.1336	0.486	0.255			0.4171	0.3857	0.1336	0.486	0.255		120	2593.32	164.594	2122.87	169.669	1026.15	106.852	789.198	144.227
	1.426	0.9	1.09	0.599	0.476	0.579	0.534			0.1596	0.3983	0.7283	0.6596		70	147	2.1	108	1.72002	66	1.51168	72	1.58242			0.1596	0.3983	0.3688	0.1212	0.456			0.1596	0.3983	0.3688	0.1212	0.456		125	2710.99	172.15	2228.09	179.642	1073.38	111.147	822.725	146.721
	1.742	1.049	0.811	0.898	0.415	0.339	0.212			0.3637	0.5745	0.2562	0.1305		80	101	1.44286	68	1.08297	24	0.549702	24	0.527473			0.3637	0.5745	0.315	0.1354	0.3424			0.3637	0.5745	0.315	0.1354	0.3424		130	2827.56	179.787	2332.87	189.693	1120.88	115.237	856.137	148.971
	1.741	1.366	0.886	0.342	0.436	0.285	0.292			0.0818	0.1683	0.501	0.4057		90	133	1.9	158	2.51632	138	3.16079	217	4.76923			0.0818	0.1683	0.4634	0.1069	0.1522			0.0818	0.1683	0.4634	0.1069	0.1522		135	2946.89	187.5	2439.39	199.817	1167.65	119.311	889.583	151.185
	2.089	1.627	0.967	0.525	0.375	0.655	0.247			0.0364	0.5362	0.4059	0.2203		100	92	1.31429	68	1.08297	43	0.984883	37	0.813187			0.0364	0.5362	0.1054	0.148	0.1943			0.0364	0.5362	0.1054	0.148	0.1943		140	3066.62	195.458	2547.39	209.759	1214.76	123.737	923.76	153.321
	1.231	1.315	1.399	0.572	0.235	0.309	0.266			0.2026	0.2154	0.0777	0.5247		110	68	0.971429	58	0.923714	43	0.984883	46	1.01099			0.2026	0.2154	0.3813	0.2981	0.9595			0.2026	0.2154	0.3813	0.2981	0.9595		145	3192.89	204.078	2657.56	219.717	1261.99	128.509	957.996	155.438
	1.249	1.239	1.236	0.304	0.88	0.497	0.239			0.2193	0.4779	0.432	0.1717		120	74	1.05714	56	0.891862	15	0.343564	22	0.483516			0.2193	0.4779	0.3341	0.1274	0.207			0.2193	0.4779	0.3341	0.1274	0.207		150	3323.55	212.891	2766.24	229.386	1307.98	133.236	991.694	157.549
	1.781	1.626	0.36	0.324	0.434	0.458	0.344			0.2957	0.5557	0.1408	0.7611		130	76	1.08571	54	0.86001	42	0.961979	54	1.18681			0.2957	0.5557	0.2506	0.1623	0.0717			0.2957	0.5557	0.2506	0.1623	0.0717		155	3454.43	221.561	2873.99	238.756	1352.27	137.538	1025.41	159.663
	1.225	1.647	0.732	0.572	0.935	0.666	0.323			0.525	0.1244	0.3076	0.2174		140	72	1.02857	36	0.57334	32	0.732936	20	0.43956			0.525	0.1244	0.2344	0.3881	0.1495			0.525	0.1244	0.2344	0.3881	0.1495		160	3584.22	230.032	2982.84	248.223	1395.35	141.609	1059	161.811
	1.415	1.26	0.75	0.545	0.638	0.753	0.368			0.4679	0.2656	0.2881	0.5676		150	63	0.9	63	1.00334	32	0.732936	35	0.769231			0.4679	0.2656	0.3371	0.3596	0.4266			0.4679	0.2656	0.3371	0.3596	0.4266		165	3714.23	238.316	3092.69	257.925	1438.14	145.492	1092.09	163.908
	1.479	1.26	1.553	0.622	0.322	0.525	0.257			0.1647	0.3748	0.4182	0.269		160	45	0.642857	52	0.828157	40	0.91617	44	0.967033			0.1647	0.3748	0.2781	0.1214	0.3307			0.1647	0.3748	0.2781	0.1214	0.3307		170	3840.79	246.376	3202.09	267.842	1480.68	149.191	1124.85	166.023
	1.065	1.384	1.586	0.505	0.501	0.242	0.287			0.3771	0.4452	0.3914	0.1977		170	47	0.671429	38	0.605192	19	0.435181	6	0.131868			0.3771	0.4452	0.078	0.5043	0.6637			0.3771	0.4452	0.078	0.5043	0.6637		175	3966.48	254.037	3312.78	277.887	1523.69	153.118	1157.32	168.123
	1.67	1.373	1.255	0.542	0.295	0.172	0.177			0.3257	0.4924	0.0468	0.5902		180	25	0.357143	31	0.493709	59	1.35135	84	1.84615			0.3257	0.4924	0.4855	0.3683	0.2742			0.3257	0.4924	0.4855	0.3683	0.2742		180	4091.82	261.289	3425.66	288.07	1567.02	157.086	1189.22	170.04
	1.408	0.978	0.582	0.57	0.646	0.489	0.364			0.3394	0.5785	0.4198	0.1185													0.3394	0.5785	0.8476	0.5812	0.238			0.3394	0.5785	0.8476	0.5812	0.238
	1.459	1.385	0.739	0.697	0.399	0.528	0.209			0.3304	0.2188	0.5596	0.5													0.3304	0.2188	0.4677	0.4973	0.5496			0.3304	0.2188	0.4677	0.4973	0.5496
	1.832	1.859	1.032	0.509	1.053	0.3	0.284			0.3001	0.5765	0.1057	0.0979													0.3001	0.5765	0.1851	0.2114	0.3422			0.3001	0.5765	0.1851	0.2114	0.3422
	1.322	1.515	1.149	0.389	1.164	0.491	0.196			0.4403	0.6171	0.8095	0.5736													0.4403	0.6171	0.2332	0.4164	0.282			0.4403	0.6171	0.2332	0.4164	0.282
	1.555	1.876	1.121	0.525	0.649	0.641	0.604			0.3099	0.1468	0.5797	0.8909													0.3099	0.1468	0.1823	0.417	0.1993			0.3099	0.1468	0.1823	0.417	0.1993
	2.26	0.999	2.713	0.758	0.77	0.596	0.367			0.4961	0.0402	0.7648	0.2188													0.4961	0.0402	0.5916	0.6951	0.5556			0.4961	0.0402	0.5916	0.6951	0.5556
	1.582	1.71	1.752	0.521	0.872	0.856	0.13			0.5745	0.3605	0.2322	0.3979													0.5745	0.3605	0.4002	0.1948	0.1428			0.5745	0.3605	0.4002	0.1948	0.1428
	1.003	2.115	1.618	0.663	0.691	0.603	0.195			0.4899	0.4135	0.5559	0.1512													0.4899	0.4135	0.3963	0.2254	0.7966			0.4899	0.4135	0.3963	0.2254	0.7966
	0.959	1.351	0.974	0.756	0.742	0.382	0.369			0.5266	0.3244	0.2137	0.4907													0.5266	0.3244	0.0853	0.3094	0.1575			0.5266	0.3244	0.0853	0.3094	0.1575
	1.398	1.422	1.183	1.3	0.818	0.231	0.155			0.4991	0.6932	0.2896	0.1682													0.4991	0.6932	0.134	0.512	0.6307			0.4991	0.6932	0.134	0.512	0.6307
	1.586	0.806	1.424	0.342	0.642	0.347	0.374			0.2111	0.4074	0.5621	0.5516													0.2111	0.4074	0.4818	0.4327	0.6959			0.2111	0.4074	0.4818	0.4327	0.6959
	1.673	1.014	1.405	0.559	0.76	0.309	0.267			0.2475	0.4774	0.8175	0.8053													0.2475	0.4774	0.3128	0.089	0.3193			0.2475	0.4774	0.3128	0.089	0.3193
	1.897	1.019	0.91	0.47	0.515	0.579	0.646			0.1794	0.4875	0.5097	0.1657													0.1794	0.4875	0.2109	0.6684	0.2285			0.1794	0.4875	0.2109	0.6684	0.2285
	1.27	1.51	1.011	0.278	0.254	0.501	0.444			0.2281	0.4558	0.5404	0.1765													0.2281	0.4558	0.4139	0.2273	0.7822			0.2281	0.4558	0.4139	0.2273	0.7822
	1.063	1.045	2.288	0.748	0.761	0.375	0.231			0.7195	0.4956	0.5613	0.3778													0.7195	0.4956	0.4576	0.3968	0.1537			0.7195	0.4956	0.4576	0.3968	0.1537
	1.255	0.948	0.562	0.729	0.457	0.445	0.469			0.3844	0.5018	0.3593	0.0898													0.3844	0.5018	0.5548	0.0234	0.4299			0.3844	0.5018	0.5548	0.0234	0.4299
	0.908	1.586	0.763	0.512	0.611	0.533	0.167			0.1033	0.4058	0.2235	0.7084													0.1033	0.4058	0.6827	0.147	0.1513			0.1033	0.4058	0.6827	0.147	0.1513
	1.643	0.91	1.417	0.334	0.608	0.462	0.196			0.145	0.2514	0.1987	0.8928													0.145	0.2514	0.5351	0.1371	0.3379			0.145	0.2514	0.5351	0.1371	0.3379
	1.144	1.061	1.907	0.838	0.581	0.293	0.436			0.4449	0.3931	0.7109	0.7119													0.4449	0.3931	0.1921	0.4138	0.3782			0.4449	0.3931	0.1921	0.4138	0.3782
	1.31	0.93	1.748	1.549	0.813	0.395	0.575			0.4501	0.5104	0.595	0.8166													0.4501	0.5104	0.2276	0.0825	0.0705			0.4501	0.5104	0.2276	0.0825	0.0705
	1.669	1.55	1.53	0.436	0.754	0.302	0.455			0.433	0.146	0.3468	0.7335													0.433	0.146	0.0933	0.2951	0.1486			0.433	0.146	0.0933	0.2951	0.1486
	1.671	1.983	1.076	0.442	0.425	0.532	0.395			0.0605	0.8922	0.3893	0.1225													0.0605	0.8922	0.4785	0.5103	0.0392			0.0605	0.8922	0.4785	0.5103	0.0392
	1.507	1.237	1.302	0.467	0.549	0.184	0.176			0.2418	0.2639	0.2716	0.5634													0.2418	0.2639	0.2142	0.105	0.299			0.2418	0.2639	0.2142	0.105	0.299
	1.721	0.987	1.25	0.623	0.526	0.275	0.394			0.2678	0.2269	0.4015	0.4796													0.2678	0.2269	0.223	0.3328	0.6837			0.2678	0.2269	0.223	0.3328	0.6837
	0.918	1.462	0.974	0.297	0.515	0.625	0.362			0.304	0.1963	0.057	0.8119													0.304	0.1963	0.3104	0.0546	0.1205			0.304	0.1963	0.3104	0.0546	0.1205
	1.162	0.761	0.824	0.444	0.374	0.454	0.237			0.1815	0.6526	0.1534	0.5234													0.1815	0.6526	0.3594	0.2596	0.563			0.1815	0.6526	0.3594	0.2596	0.563
	2.492	1.305	0.891	1.028	0.643	0.221	0.445			0.2548	0.3187	0.5029	0.7726													0.2548	0.3187	0.2232	0.2297	0.3852			0.2548	0.3187	0.2232	0.2297	0.3852
	1.574	1.557	1.749	0.575	0.657	0.37	0.355			0.4561	0.5031	0.536	0.742													0.4561	0.5031	0.3674	0.0958	0.0577			0.4561	0.5031	0.3674	0.0958	0.0577
	1.014	1.572	3.871	1.552	0.623	0.404	0.094			0.1624	0.2719	0.2753	0.543													0.1624	0.2719	0.2126	0.0363	0.1191			0.1624	0.2719	0.2126	0.0363	0.1191
	1.493	0.882	0.853	0.39	0.529	0.465	0.856			0.1769	0.322	0.1722	0.1495													0.1769	0.322	0.0396	0.1683	0.2865			0.1769	0.322	0.0396	0.1683	0.2865
	1.008	1.054	1.045	0.656	0.624	0.387	0.246			0.5194	0.4091	0.5101	0.4099													0.5194	0.4091	0.1363	0.2782	0.5692			0.5194	0.4091	0.1363	0.2782	0.5692
	1.23	0.87	1.119	0.714	0.721	0.308	0.205			0.1151	0.2393	0.6232	0.025													0.1151	0.2393	0.5023	0.3798	0.5995			0.1151	0.2393	0.5023	0.3798	0.5995
	1.411	1.027	0.942	0.756	0.676	0.389	0.145			0.4445	0.7552	0.3372	0.9027													0.4445	0.7552	0.0884	0.116	0.2916			0.4445	0.7552	0.0884	0.116	0.2916
	1.379	1.857	0.958	0.289	0.782	0.482	0.298			0.1853	0.297	0.1055	0.8067													0.1853	0.297	0.3838	0.0826	0.3444			0.1853	0.297	0.3838	0.0826	0.3444
	1.231	1.132	0.353	0.652	0.632	0.201	0.156			0.2919	0.3941	0.0974	0.8758													0.2919	0.3941	0.1001	0.2661	0.3471			0.2919	0.3941	0.1001	0.2661	0.3471
	1.722	0.841	0.843	0.338	0.489	0.322	0.11			0.1217	0.302	0.5153	0.8159													0.1217	0.302	0.2824	0.0307	0.1848			0.1217	0.302	0.2824	0.0307	0.1848
	0.907	1.257	0.619	0.183	0.475	0.357	0.428			0.5103	0.3847	0.3141	0.5195													0.5103	0.3847	0.4806	0.2721	0.1412			0.5103	0.3847	0.4806	0.2721	0.1412
	1.797	2.028	0.534	0.985	0.648	0.465	0.862			0.2789	0.2764	0.7161	0.5671													0.2789	0.2764	0.2658	0.3728	0.3331			0.2789	0.2764	0.2658	0.3728	0.3331
	1.247	1.34	0.75	0.751	1.005	0.22	0.501			0.4077	0.0423	0.5469	0.794													0.4077	0.0423	0.2737	0.3015	0.6341			0.4077	0.0423	0.2737	0.3015	0.6341
	1.632	1.604	0.587	0.88	1.608	0.662	0.561			0.5892	0.4402	0.5273	0.4553													0.5892	0.4402	0.357	0.0384	0.4828			0.5892	0.4402	0.357	0.0384	0.4828
	1.538	0.9	1.171	0.885	0.549	0.447	0.548			0.4582	0.3979	0.4483	0.3348													0.4582	0.3979	0.1779	0.3654	0.2727			0.4582	0.3979	0.1779	0.3654	0.2727
	1.022	1.267	1.781	0.747	0.527	0.603	0.539			0.4882	0.5959	0.509	0.7654													0.4882	0.5959	0.2037	0.272	0.271			0.4882	0.5959	0.2037	0.272	0.271
	0.778	1.366	1.168	0.641	1.648	0.323	0.306			0.085	0.2241	0.3819	0.8083													0.085	0.2241	0.2794	0.274	0.4515			0.085	0.2241	0.2794	0.274	0.4515
	1.111	1.704	0.864	0.289	0.746	0.33	0.376			0.5852	0.2915	0.2778	0.6405													0.5852	0.2915	0.0792	0.5388	0.3182			0.5852	0.2915	0.0792	0.5388	0.3182
	1.103	1.42	1.555	0.596	0.778	0.562	0.514			0.1685	0.505	0.4863	0.8631													0.1685	0.505	0.3302	0.0508	0.0833			0.1685	0.505	0.3302	0.0508	0.0833
	0.882	0.884	0.716	1.007	0.743	0.206	0.413			0.5149	0.3638	0.1299	0.6155													0.5149	0.3638	0.2305	0.5199				0.5149	0.3638	0.2305	0.5199
	1.658	1.136	0.989	0.673	0.411	0.706	0.613			0.3773	0.3916	0.3951	0.8073													0.3773	0.3916	0.3137	0.1351				0.3773	0.3916	0.3137	0.1351
	2.102	0.687	1.15	0.843	0.385	0.515	0.439			0.4376	0.5384	0.6546	0.4153													0.4376	0.5384	0.411	0.3641				0.4376	0.5384	0.411	0.3641
	1.489	1.02	1.072	0.532	1.659	0.226	0.448			0.1043	0.535	0.39	0.4336													0.1043	0.535	0.3739	0.0993				0.1043	0.535	0.3739	0.0993
	3.172	0.89	1.096	1.075	0.598	0.417	0.274			0.28	0.6081	0.3567	0.2282													0.28	0.6081	0.4731	0.5722				0.28	0.6081	0.4731	0.5722
	1.408	1.474	2.305	0.491	0.706	0.426	0.256			0.2873	0.6597	0.2497	0.4471													0.2873	0.6597	0.2847	0.3339				0.2873	0.6597	0.2847	0.3339
	1.258	1.271	1.093	0.668	1.015	0.512	0.651			0.4565	0.3478	0.3894	0.5892													0.4565	0.3478	0.3073	0.7273				0.4565	0.3478	0.3073	0.7273
	0.816	0.743	1.125	0.456	0.501	0.387	0.298			0.2447	0.5024	0.7355	0.4014													0.2447	0.5024	0.2405	0.0771				0.2447	0.5024	0.2405	0.0771
	1.541	1.145	1.178	0.51	0.862	0.41	0.674			0.483	0.3911	0.4221	0.1557													0.483	0.3911	0.0832	0.4963				0.483	0.3911	0.0832	0.4963
	1.293	1.513	1.048	1.337	0.758	0.55	0.784			0.4282	0.4492	0.1728	0.779													0.4282	0.4492	0.282	0.1706				0.4282	0.4492	0.282	0.1706
	1.581	1.355	1.078	0.667	0.452	0.498	0.468			0.1297	0.2591	0.3982	0.0779													0.1297	0.2591	0.2809	0.4152				0.1297	0.2591	0.2809	0.4152
	1.67	1.043	0.704	1.116	0.91	0.517	0.662			0.1312	0.6187	0.2437	0.5364													0.1312	0.6187	0.3496	0.5525				0.1312	0.6187	0.3496	0.5525
	1.361	1.23	0.785	0.487	0.576	0.849	0.683			0.1055	0.3858	0.494	0.4435													0.1055	0.3858	0.3635	0.1522				0.1055	0.3858	0.3635	0.1522
	1.483	1.259	0.894	0.907	0.738	0.391	0.487			0.1595	0.186	0.5662	0.7029													0.1595	0.186	0.2636	0.2361				0.1595	0.186	0.2636	0.2361
	2.207	1.084	1.378	0.382	0.823	0.31	0.376			0.3818	0.5968	0.5903	0.6715													0.3818	0.5968	0.2463	0.0821				0.3818	0.5968	0.2463	0.0821
	1.252	1.299	0.418	0.94	0.654	0.896	0.211			0.5184	0.7209	0.1597	0.203													0.5184	0.7209	0.3044	0.3155				0.5184	0.7209	0.3044	0.3155
	1.12	1.074	1.332	0.671	0.358	0.216	0.442			0.2524	0.3203	0.1154	0.3245													0.2524	0.3203	0.6163	0.2264				0.2524	0.3203	0.6163	0.2264
	1.704	0.816	1.201	0.85	0.931	0.285	0.344			0.1409	0.4766	0.7175	0.1153													0.1409	0.4766	0.4277	0.3159				0.1409	0.4766	0.4277	0.3159
	1.499	0.843	0.819	0.341	0.731	0.508	0.566			0.1805	0.6434	0.0753	0.799													0.1805	0.6434	0.3987	0.1721				0.1805	0.6434	0.3987	0.1721
	1.727	0.755	2.019	0.597	0.601	0.461	0.877			0.3698	0.4968	0.5467	0.2472													0.3698	0.4968	0.222	0.3219				0.3698	0.4968	0.222	0.3219
	0.949	0.913	1.643	0.674	0.768	0.821	0.979			0.4205	0.2017	0.6406	0.5891													0.4205	0.2017	0.4629	0.3517				0.4205	0.2017	0.4629	0.3517
	1.537	0.813	1.446	0.733	0.417	0.764	0.322			0.4067	0.743	0.3737	0.2939													0.4067	0.743	0.2946	0.6069				0.4067	0.743	0.2946	0.6069
	1.537	1.197	0.824	0.427	0.29	0.603	0.616			0.223	0.6528	0.1693	0.8166													0.223	0.6528	0.2254	0.3447				0.223	0.6528	0.2254	0.3447
	1.745	2.035	1.37	0.509	0.419	0.71	0.8			0.1251	0.4978	0.8203	0.6615													0.1251	0.4978	0.2927	0.3905				0.1251	0.4978	0.2927	0.3905
	1.428	1.666	1.359	0.564	0.689	0.305	0.6			0.2356	0.3159	0.5482	0.4659													0.2356	0.3159	0.3274	0.4807				0.2356	0.3159	0.3274	0.4807
	1.881	1.462	0.862	0.636	0.443	0.786	0.817			0.1291	0.4146	0.6226	0.3445													0.1291	0.4146	0.2729	0.2882				0.1291	0.4146	0.2729	0.2882
	1.094	1.105	0.639	0.687	0.463	0.273	0.525			0.3032	0.5002	0.4491	0.1713													0.3032	0.5002	0.7019	0.2829				0.3032	0.5002	0.7019	0.2829
	1.357	0.402	0.969	0.752	0.287	0.698	0.486			0.2606	0.6513	0.6182	0.3041													0.2606	0.6513	0.0586	0.0432				0.2606	0.6513	0.0586	0.0432
	1.042	0.533	1.136	0.339	0.322	0.679	0.328			0.3191	0.6249	0.3703	0.6744													0.3191	0.6249	0.5021	0.6392				0.3191	0.6249	0.5021	0.6392
	1.371	1.016	1.595	0.371	0.223	0.504	0.419			0.3729	0.425	0.7985	0.4249													0.3729	0.425	0.4538	0.2317				0.3729	0.425	0.4538	0.2317
	1.182	0.957	1.241	0.547	0.327	0.256	0.335			0.3249	0.3301	0.5839	0.3788													0.3249	0.3301	0.3032	0.3383				0.3249	0.3301	0.3032	0.3383
	1.113	1.155	1.34	0.821	0.451	0.67	1.67			0.1993	0.5649	0.4256	0.7001													0.1993	0.5649	0.2332					0.1993	0.5649	0.2332
	2.015	1.407	1.781	0.741	0.605	0.447	0.412			0.3512	0.2386	0.2623	0.3883													0.3512	0.2386	0.1292					0.3512	0.2386	0.1292
	1.006	1.173	1.478	0.804	0.224	0.46	0.492			0.5752	0.3653	0.2093	0.0536													0.5752	0.3653	0.1769					0.5752	0.3653	0.1769
	1.451	0.924	1.149	0.626	0.385	0.382	0.636			0.3278	0.4376	0.6341	0.2429													0.3278	0.4376	0.2353					0.3278	0.4376	0.2353
	2.294	1.266	1.619	0.733	0.416	1.13	0.737			0.1009	0.5799	0.5622	0.5069													0.1009	0.5799						0.1009	0.5799
	1.113	0.85	1.155	1.065	0.21	0.248	0.419			0.243	0.3393	0.5591	0.6263													0.243	0.3393						0.243	0.3393
	1.471	1.114	1.163	0.729	0.495	0.64	0.263			0.3438	0.4819	0.4806	0.1813													0.3438	0.4819						0.3438	0.4819
	1.163	0.8	1.27	1.114	0.36	0.701	0.709			0.1821	0.7274	0.3767	0.5288													0.1821	0.7274						0.1821	0.7274
	1.107	1.79	1.654	0.573	0.564	0.785				0.2619	0.6197	0.5768	0.4889													0.2619	0.6197						0.2619	0.6197
	1.357	0.829	0.722	0.268	0.393	0.516				0.1273	0.2964	0.4024	0.5308													0.1273	0.2964						0.1273	0.2964
	2.208	0.901	0.948	0.566	0.307	0.353				0.4	0.4488	0.3666	0.1243													0.4	0.4488						0.4	0.4488
	1.943	1.742	1.363	0.397	0.312	0.633				0.1577	0.3092	0.4664	0.8121													0.1577	0.3092						0.1577	0.3092
	1.458	1.31	1.232	0.411	0.256	0.262				0.6114	0.4957	0.2575	0.6631													0.6114	0.4957						0.6114	0.4957
	1.746	1.101	0.996	1.004	0.258	0.565				0.1828	0.3808	0.2976	0.2987													0.1828	0.3808						0.1828	0.3808
	1.127	2.262	0.9	0.919	0.566	0.213				0.378	0.5791	0.6867	0.5717													0.378	0.5791						0.378	0.5791
	1.207	2.128	1.093	0.726	0.256	0.751				0.4021	0.3593	0.3608	0.4456													0.4021	0.3593						0.4021	0.3593
	1.065	1.232	1.155	0.403	0.217	0.608				0.3824	0.8603	0.8066	0.5644													0.3824	0.8603						0.3824	0.8603
	1.134	1.681	0.613	0.616	0.19	0.38				0.5055	0.1927	0.5733	0.3738													0.5055	0.1927						0.5055	0.1927
	0.755	1.983	0.866	0.335	0.207	0.52				0.5135	0.1567	0.6978	0.6414													0.5135	0.1567						0.5135	0.1567
	1.226	1.517	1.143	0.412	0.218	0.377				0.1796	0.454	0.2956	0.4634													0.1796	0.454						0.1796	0.454
	1.379	0.772	1.759		0.319	0.837				0.55	0.0992		0.3725													0.55	0.0992						0.55	0.0992
	1.172	1.296	1.365		0.727	0.39				0.1437	0.3501		0.6254													0.1437	0.3501						0.1437	0.3501
	2.238	1.856	0.696		0.525	0.955				0.2093	0.3996		0.434													0.2093	0.3996						0.2093	0.3996
	0.898	0.466	1.077		0.541	0.54				0.4993	0.1119		0.8525													0.4993	0.1119						0.4993	0.1119
	1.827	1.068	1.39		0.353					0.0154	0.4448															0.0154	0.4448						0.0154	0.4448
	1.76	1.16	0.731		0.42					0.7323	0.2312															0.7323	0.2312						0.7323	0.2312
	0.619	0.864	0.898		0.62					0.5327	0.1334															0.5327	0.1334						0.5327	0.1334
	1.304	1.385	1.539		0.251					0.34	0.4226															0.34	0.4226						0.34	0.4226
	1.28	0.866	0.441		0.146					0.2941	0.496															0.2941	0.496						0.2941	0.496
	1.865	1.404	1.548		0.361					0.125	0.3588															0.125	0.3588						0.125	0.3588
	1.297	0.735	1.225		0.314					0.3307	0.346															0.3307	0.346						0.3307	0.346
	2.111	1.293	1.282		0.281					0.3084	0.3737															0.3084	0.3737						0.3084	0.3737
	0.99	0.929	1.396		0.506					0.3237	0.6979															0.3237	0.6979						0.3237	0.6979
	1.472	1.01	1.356		0.434					0.388	0.4896															0.388	0.4896						0.388	0.4896
	1.38	1.449	1.568		0.575					0.2317	0.4905															0.2317	0.4905						0.2317	0.4905
	1.459	1.385	1.841		0.507					0.5159	0.537															0.5159	0.537						0.5159	0.537
	1.425	1.671	1.217		0.717					0.3493	0.4333															0.3493	0.4333						0.3493	0.4333
	1.994	1.14	1.396							0.3292	0.4911															0.3292	0.4911						0.3292	0.4911
	1.747	1.212	0.646							0.4258	0.731															0.4258	0.731						0.4258	0.731
	1.808	1.418	0.806							0.6222	0.5651															0.6222	0.5651						0.6222	0.5651
	0.94		0.889							0.0731																0.0731							0.0731
	1.234									0.1673																0.1673							0.1673
	0.789									0.2628																0.2628							0.2628
	1.21									0.1173																0.1173							0.1173
	1.389									0.4989																0.4989							0.4989
	0.974									0.3392																0.3392							0.3392
	0.753									0.423																0.423							0.423
	0.979									0.4941																0.4941							0.4941
	1.86									0.4907																0.4907							0.4907
	1.667									0.3984																0.3984							0.3984
	1.667									0.1453																0.1453							0.1453
	1.156									0.5507																0.5507							0.5507
	1.08									0.194																0.194							0.194
	1.741									0.4943																0.4943							0.4943
	1.796									0.4848																0.4848							0.4848
	1.296									0.5371																0.5371							0.5371
	1.255									0.3795																0.3795							0.3795
	1.894									0.2624																0.2624							0.2624
	1.337									0.4687																0.4687							0.4687
	1.91									0.4973																0.4973							0.4973
	2.063									0.5045																0.5045							0.5045
	1.794									0.1462																0.1462							0.1462
	1.017									0.474																0.474							0.474
	0.448									0.6469																0.6469							0.6469
	1.339									0.058																0.058							0.058
	1.199									0.4206																0.4206							0.4206
	1.443									0.4229																0.4229							0.4229
	1.65									0.4272																0.4272							0.4272
	1.368									0.4126																0.4126							0.4126
	1.048									0.6253																0.6253							0.6253
	1.217									0.34																0.34							0.34
	1.324									0.1624																0.1624							0.1624
	1.108									0.5389																0.5389							0.5389
	1.988									0.2419																0.2419							0.2419
	1.806									0.5636																0.5636							0.5636
	2.31									0.3039																0.3039							0.3039
	2.166									0.3297																0.3297							0.3297
	2.193									0.0774																0.0774							0.0774
	1.116									0.3385																0.3385							0.3385
	2.017									0.0816																0.0816							0.0816
	2.166									0.1961																0.1961							0.1961
	1.59									0.5068																0.5068							0.5068
	1.059									0.2655																0.2655							0.2655
	1.551									0.3768																0.3768							0.3768
	1.116									0.5333																0.5333							0.5333
	1.648									0.2424																0.2424							0.2424
	0.959									0.3118																0.3118							0.3118
	1.83									0.4699																0.4699							0.4699
	1.58									0.3329																0.3329							0.3329
	1.021									0.5614																0.5614							0.5614
	1.886									0.1135																0.1135							0.1135
	1.532									0.2889																0.2889							0.2889
	1.331									0.2844																0.2844							0.2844
	1.732									0.2339																0.2339							0.2339
	1.683									0.3935																0.3935							0.3935
	0.873									0.199																0.199							0.199
Statistics	p-value								Statistics	p-value															Statistics	p-value						Statistics	p-value
Kuskal-Wallis test	< 0.0001								Kuskal-Wallis test	< 0.0001															Kuskal-Wallis test	< 0.0001						Kuskal-Wallis test	< 0.0001
Dunn's									Dunn's																Dunn's							Dunn's
B16-F1 vs E-KO #23	n.s.								B16-F1 vs E-KO #23	***															B16-F1 vs EVM-KO	***						B16-F1 vs EVM-KO	***
B16-F1 vs E-KO #27	**								B16-F1 vs EV-KO #23	***															B16-F1 vs VASP rescue	***						B16-F1 vs VASP rescue	n.s.
B16-F1 vs EV-KO #23	***								B16-F1 vs EVM-KO #23	***															B16-F1 vs Evl rescue	***						B16-F1 vs Evl rescue	n.s.
B16-F1 vs EV-KO #27	***								E-KO #23 vs EV-KO #23	n.s.															B16-F1 vs Mena rescue	***						B16-F1 vs Mena rescue	n.s.
B16-F1 vs EVM-KO #23	***								E-KO #23 vs EVM-KO #23	n.s.															EVM-KO vs VASP rescue	***						EVM-KO vs VASP rescue	***
B16-F1 vs EVM-KO #27	***								EV-KO #23 vs EVM-KO #23	n.s.															EVM-KO vs Evl rescue	***						EVM-KO vs Evl rescue	***
E-KO #23 vs E-KO #27	n.s.																								EVM-KO vs Mena rescue	***						EVM-KO vs Mena rescue	***
E-KO #23 vs EV-KO #23	***								*	< 0.05															VASP rescue vs Evl rescue	***						VASP rescue vs Evl rescue	n.s.
E-KO #23 vs EV-KO #27	***								**	< 0.01															VASP rescue vs Mena rescue	***						VASP rescue vs Mena rescue	n.s.
E-KO #23 vs EVM-KO #23	***								***	< 0.001															Evl rescue vs Mena rescue	n.s.						Evl rescue vs Mena rescue	n.s.
E-KO #23 vs EVM-KO #27	***								n.s.	> 0.05
E-KO #27 vs EV-KO #23	***																								*	< 0.05						*	< 0.05
E-KO #27 vs EV-KO #27	***																								**	< 0.01						**	< 0.01
E-KO #27 vs EVM-KO #23	***																								***	< 0.001						***	< 0.001
E-KO #27 vs EVM-KO #27	***																								n.s.	> 0.05						n.s.	> 0.05
EV-KO #23 vs EV-KO #27	n.s.
EV-KO #23 vs EVM-KO #23	*
EV-KO #23 vs EVM-KO #27	**
EV-KO #27 vs EVM-KO #23	n.s.
EV-KO #27 vs EVM-KO #27	n.s.
EVM-KO #23 vs EVM-KO #27	n.s.
*	< 0.05
**	< 0.01
***	< 0.001
n.s.	> 0.05
