# Supplementary material for: Loss of Ena/VASP interferes with lamellipodium architecture, motility and integrin-dependent adhesion
Source: eLife. 2020 May 11;9:e55351. doi: 10.7554/eLife.55351 (PMC7239657; doi:10.7554/eLife.55351)
Supplement: Figure 2—figure supplement 1—source data 1. [file elife-55351-fig2-figsupp1-data1.xlsx]

## Sheet: Sheet1
Source Data Figure 2-figure supplement 1			Figure 2-figure supplement 1. Elimination of Evl in MVD7 cells affects directionality. (A) Quantification of directionality
Figure 2-figure supplement 1 A
Directionality index
Statistics see below dataset
Cell lines	MVD7	MVE-KO	Evl rescue
Mean	0.327817	0.528895	0.270988
Median	0.3246	0.5527	0.2445
SD	0.210948	0.221886	0.148144
SEM	0.02637	0.01777	0.01722
25 % Percentil	0.1184	0.3452	0.1578
75 % Percentil	0.4865	0.7104	0.3734
C.I. of mean	0.0527	0.0351	0.0343
n	64	158	74
	0.3016	0.7123	0.2955
	0.5413	0.8666	0.3725
	0.3548	0.5249	0.0813
	0.3854	0.7995	0.2046
	0.6991	0.6824	0.161
	0.6467	0.6717	0.2264
	0.3443	0.8667	0.1957
	0.4913	0.672	0.1156
	0.6005	0.4586	0.0615
	0.2373	0.1749	0.531
	0.1564	0.6325	0.3513
	0.0604	0.4578	0.1045
	0.1153	0.7186	0.3212
	0.5954	0.7697	0.451
	0.0895	0.4228	0.2424
	0.3348	0.8549	0.2725
	0.0932	0.8109	0.1397
	0.34	0.7688	0.22
	0.1128	0.6433	0.766
	0.0928	0.7034	0.586
	0.3904	0.6116	0.3983
	0.1778	0.8369	0.0634
	0.6476	0.3954	0.2429
	0.4282	0.5723	0.4459
	0.7354	0.6828	0.4472
	0.123	0.8101	0.0655
	0.0993	0.7347	0.277
	0.3763	0.4659	0.4895
	0.0548	0.7422	0.3524
	0.472	0.6043	0.3927
	0.4421	0.7606	0.2755
	0.123	0.5959	0.2755
	0.1863	0.7361	0.2185
	0.2952	0.8074	0.4769
	0.7472	0.7337	0.1268
	0.1604	0.3638	0.1788
	0.4431	0.6587	0.3621
	0.618	0.1065	0.1893
	0.1168	0.7243	0.2049
	0.2423	0.6202	0.2122
	0.3375	0.6839	0.246
	0.1063	0.6344	0.2991
	0.4122	0.4539	0.2487
	0.1064	0.0374	0.1189
	0.434	0.6663	0.0939
	0.5465	0.5167	0.4574
	0.1542	0.718	0.2235
	0.3953	0.152	0.1226
	0.496	0.7755	0.1658
	0.0835	0.4582	0.113
	0.6428	0.4935	0.148
	0.1332	0.303	0.3552
	0.7679	0.172	0.0225
	0.3144	0.2953	0.4699
	0.1505	0.7073	0.4975
	0.0788	0.7775	0.0266
	0.1828	0.7044	0.3274
	0.4459	0.3685	0.3204
	0.0931	0.1545	0.1324
	0.1165	0.4316	0.17
	0.0663	0.339	0.4479
	0.2791	0.2291	0.2982
	0.5748	0.8363	0.1746
	0.5902	0.8782	0.1343
		0.5618	0.192
		0.6218	0.422
		0.5435	0.2995
		0.7961	0.1695
		0.2915	0.4216
		0.428	0.1413
		0.8606	0.1978
		0.2975	0.4956
		0.8757	0.3762
		0.2748	0.3288
		0.6983
		0.3762
		0.7114
		0.3312
		0.4769
		0.8023
		0.8688
		0.5902
		0.4194
		0.2933
		0.0942
		0.5017
		0.3028
		0.7151
		0.4695
		0.3255
		0.4276
		0.3114
		0.6954
		0.8759
		0.2634
		0.6686
		0.4565
		0.4396
		0.6277
		0.6762
		0.4617
		0.3126
		0.4453
		0.111
		0.7261
		0.5142
		0.441
		0.2591
		0.1943
		0.8339
		0.5243
		0.9035
		0.61
		0.0541
		0.3383
		0.1866
		0.5369
		0.2611
		0.462
		0.813
		0.5794
		0.1621
		0.73
		0.0873
		0.4493
		0.3143
		0.5093
		0.6609
		0.3376
		0.5775
		0.6452
		0.1361
		0.6228
		0.6234
		0.8666
		0.3256
		0.6322
		0.6032
		0.3747
		0.4732
		0.299
		0.4582
		0.5162
		0.423
		0.1685
		0.7585
		0.6166
		0.3861
		0.1577
		0.1192
		0.7636
		0.6098
		0.6885
		0.677
		0.2064
		0.427
		0.1361
		0.6228
Statistics	p-value
Kruskal-Wallis test	< 0.0001
Dunn's
MVD7 vs MVE-KO	***
MVD7 vs Evl rescue	n.s.
MVE-KO vs Evl rescue	***
*	< 0.05
**	< 0.01
***	< 0.001
n.s.	> 0.05
