# Supplementary material for: Loss of Ena/VASP interferes with lamellipodium architecture, motility and integrin-dependent adhesion
Source: eLife. 2020 May 11;9:e55351. doi: 10.7554/eLife.55351 (PMC7239657; doi:10.7554/eLife.55351)
Supplement: Figure 2—source data 1. [file elife-55351-fig2-data1.xlsx]

## Sheet: Sheet1
Source Data Figure 2	Figure 2. Inactivation of Ena/VASP proteins in various fibroblasts impairs cell migration
Figure 2 B					Figure 2 C								Figure 2 E								Figure 2 F					Figure 2 H							Figure 2 I
Cell speed in µm/min					MSD in µm²								Scratch area over time in %								Average wound healing rate in µm²/min					Cell speed in µm/min							MSD in µm²
Statistics see below dataset																					Statistics see below dataset					Statistics see below dataset
Cell line	MVD7	MVE-KO	Evl rescue		Cell line	MVD7	SEM	MVE-KO	SEM	Evl rescue	SEM		Cell line	MVD7	SEM	MVE-KO	SEM	Evl rescue	SEM		Cell line	MVD7	MVE-KO	Evl rescue		Cell line	NIH 3T3	M-KO #10	M-KO #17	MV-KO #10.6	MV-KO #10.9		Cell line	NIH 3T3	SEM	M-KO	SEM	MV-KO	SEM
Mean	0.557812	0.407671	0.67777		Time in min								Time in h								Mean	21250.2	18121.4	23044.1		Mean	0.453288	0.409403	0.400578	0.333304	0.288918		Time in min
Median	0.553	0.392	0.6945		0	0	0	0	0	0	0		0	100	0	100	0	100	0		Median	23833	18209	23282		Median	0.443	0.375	0.3765	0.2705	0.3025		0	0	0	0	0	0	0
SD	7.87134	12.5384	8.47101		10	26.695	14.784	13.915	1.495	38.364	7.084		1	97.2777	1.1025	98.648	0.5423	95.1339	2.2034		SD	2042.67	2658.02	2066.24		SD	0.181396	0.176627	0.170631	0.156403	0.118225		10	15.401	2.854	13.865	2.639	8.167	1.429
SEM	0.02401	0.01328	0.03226		20	58.982	21.375	44.162	4.649	129.653	20.878		2	92.9993	1.9782	96.1228	1.2396	89.1191	3.0956		SEM	722.2	939.8	730.5		SEM	0.01539	0.01619	0.01584	0.01021	0.01549		20	59.789	10.634	40.918	6.132	22.473	3.735
25 % Percentil	0.4428	0.2775	0.4413		30	107.108	26.332	89.127	9.247	239.269	37.059		3	88.323	2.4303	92.7121	2.3722	83.3877	3.9357		25 % Percentil	22582	15734	20879		25 % Percentil	0.333	0.296	0.2748	0.208	0.2168		30	122.064	19.625	85.417	12.385	41.945	6.78
75 % Percentil	0.6798	0.5248	0.9168		40	167.229	31.086	145.729	14.679	369.403	53.586		4	82.4934	2.5503	88.6717	3.7673	77.5914	5.3576		75 % Percentil	26027	20873	24605		75 % Percentil	0.57	0.517	0.4728	0.3483	0.841		40	198.889	28.769	148.735	20.88	65.506	9.923
C.I. of mean	0.048	0.0262	0.0643		50	238.471	37.501	209.86	20.593	503.247	67.183		5	76.7309	3.007	84.847	5.1143	71.8727	6.3665		C.I. of mean	1707.72	2222.16	1727.42		C.I. of mean	0.0304	0.0321	0.0314	0.0307	0.0202		50	287.796	38.846	225.874	30.768	93.279	13.473
n	64	158	74		60	312.871	45.085	277.53	26.444	645.215	82.132		6	70.5964	3.5013	80.7245	6.3186	65.7648	7.3976		n	8	8	8		n	139	119	116	102	134		60	389.225	49.487	318.212	42.632	124.85	17.322
	0.673	0.524	0.274		70	388.528	52.549	352.516	32.794	790.896	95.098		7	64.7378	3.7568	77.2719	6.8329	60.3142	7.9691			20491	17509.4	21011.5			0.145	0.226	0.462	0.428	0.299		70	499.56	60.139	420.134	55.75	161.108	21.791
	0.166	0.207	0.454		80	468.579	60.145	430.483	39.016	934.518	107.464		8	58.937	4.3116	73.1492	7.798	54.8532	8.7363			26442.2	18908.4	23419			0.483	0.313	0.444	0.257	0.288		80	621.366	71.689	536.548	71.868	202.542	27.658
	0.546	0.215	0.919		90	544.388	67.223	512.732	44.965	1084.24	121.672		9	52.9701	5.3838	69.1744	8.0881	49.9051	8.1619			22978.2	18969.4	24839.4			0.551	0.296	0.437	0.237	0.203		90	752.928	84.245	661.331	87.406	244.297	33.309
	0.466	0.237	0.668		100	616.261	73.132	597.899	50.817	1245.52	138.47		10	46.6912	6.0414	64.2756	9.1255	45.2634	9.4413			22449.7	14351.3	23901.9			0.35	0.296	0.254	0.147	0.167		100	896.094	97.034	792.311	103.013	286.593	38.576
	0.489	0.3	0.819		110	687.341	78.208	684.759	56.702	1408.06	155.586		11	40.7699	6.9224	58.9597	11.2026	39.937	9.2528			24512.8	15442	20835.1			0.357	0.439	0.196	0.177	0.196		110	1046.15	109.532	930.367	117.258	330.999	43.52
	0.313	0.287	0.974		120	764.497	82.927	774.96	62.99	1576.14	172.741		12	34.5352	8.0028	53.403	11.6915	35.396	9.6531			26442.2	16611.8	26442.2			0.279	0.321	0.267	0.174	0.169		120	1199.87	121.202	1076	130.909	374.116	47.948
	0.587	0.413	1.076		130	846.066	88.147	868.776	69.409	1753.49	191.171		13	27.9292	8.4512	48.4173	11.8558	30.3401	9.0186			24781.2	21672.1	23144.1			0.265	0.287	0.121	0.27	0.257		130	1358.03	132.637	1227.12	144.276	418.226	52.033
	0.581	0.303	0.357		140	932.677	93.412	964.776	75.789	1934.19	211.971		14	22.6012	8.9752	43.5895	11.8037	25.4091	8.9248			23154	21507.1	20759.8			0.297	0.306	0.418	0.27	0.35		140	1521.08	144.772	1376.8	157.086	464.066	56.229
	0.448	0.139	0.503		150	1022.6	99.813	1063.99	82.067	2116.2	234.556		15	17.8232	8.7891	38.6789	11.8913	21.6212	8.8047								0.558	0.113	0.26	0.622	0.229		150	1685.47	156.721	1526.05	169.65	511.771	60.532
	0.547	0.228	0.317		160	1124.01	107.747	1166.12	88.298	2302.93	258.018		16	13.5918	8.4591	34.2507	11.0162	16.7176	8.2935								0.624	0.191	0.293	0.188	0.277		160	1854.32	168.972	1676.32	182.248	561.583	64.858
	0.568	0.22	0.554		170	1231	116.776	1273.61	94.821	2489.25	280.724		17	9.5898	7.7251	30.9443	10.3477	12.8508	7.8142		Statistics	p-value					0.326	0.472	0.255	0.483	0.213		170	2025.36	181.525	1830.59	195.103	613.404	69.37
	0.579	0.378	0.386		180	1338.06	126.517	1385.59	101.72	2682.18	303.705										Kruskal-Wallis test	0.0024					0.624	0.201	0.16	0.108	0.27		180	2197.39	194.198	1987.33	208.137	668.898	74.354
	0.35	0.232	0.492		190	1451.79	136.111	1503.82	108.874	2874.25	323.727										Dunn's						0.362	0.463	0.266	0.274	0.35		190	2371.02	207.095	2146.77	221.362	725.806	79.708
	0.634	0.225	0.444		200	1565.21	144.828	1628.13	116.185	3068.84	340.716										MVD7 vs MVE-KO	**					0.639	0.098	0.261	0.343	0.437		200	2543.55	220.032	2306.2	234.762	785.148	85.399
	0.515	0.187	0.466		210	1680.05	153.409	1757.79	123.686	3255.37	353.248										MVD7 vs Evl rescue	n.s.					0.264	0.203	0.36	0.196	0.762		210	2713.66	233.152	2468.1	249.098	849.677	91.88
	0.452	0.243	0.282		220	1793.61	161.155	1893.2	131.281	3440.18	364.753										MVE-KO vs Evl rescue	*					0.732	0.179	0.269	0.245	0.233		220	2882.71	246.393	2628.73	263.749	916.998	98.961
	0.685	0.25	0.543		230	1905.61	168.283	2031.62	139.285	3624.33	375.144																0.924	0.336	0.371	0.345	0.104		230	3046.67	259.245	2786.44	278.589	988.14	106.676
	0.632	0.295	0.527		240	2021.57	177.217	2174.64	147.631	3801.04	384.433										*	< 0.05					0.303	0.252	0.241	0.661	0.167		240	3206.59	271.843	2943.4	293.158	1061.53	115.059
	0.902	0.372	0.515		250	2144.73	187.815	2320.01	156.122	3988.19	394.254										**	< 0.01					0.563	0.326	0.258	0.739	0.154		250	3364.77	284.336	3099.32	307.639	1136.32	123.932
	0.748	0.341	0.396		260	2268.07	199.21	2465.53	164.874	4177.22	405.235										***	< 0.001					0.493	0.38	0.176	0.358	0.218		260	3520.71	296.659	3252.22	321.63	1212.99	133.48
	0.587	0.527	0.199		270	2390.12	211.169	2612.76	173.908	4367.1	416.524										n.s.	> 0.05					0.392	0.338	0.432	0.199	0.216		270	3674.19	308.75	3402.45	334.901	1291.39	143.623
	0.916	0.215	0.344		280	2518.03	224.495	2762.7	183.512	4561.16	428.224																0.346	0.301	0.411	0.314	0.563		280	3828	320.871	3551.16	347.808	1369.41	154.022
	0.495	0.206	0.485		290	2645.68	238.362	2914.35	193.613	4755	440.597																0.321	0.358	0.371	0.581	0.216		290	3978.61	332.996	3700.58	360.252	1448.19	165.055
	0.57	0.304	0.538		300	2773.14	252.234	3067.9	204.038	4939.33	452.824																0.463	0.127	0.209	0.275	0.162		300	4128.47	345.063	3849.06	372.591	1527.15	176.328
	0.649	0.217	0.713		310	2899.43	265.995	3223.71	214.845	5113.3	465.034																0.311	0.204	0.399	0.313	0.334		310	4278.25	357.441	3999.41	385.037	1605.89	187.632
	0.624	0.102	0.495		320	3022.01	279.52	3380.49	226.007	5288.82	478.393																0.216	0.695	0.381	0.431	0.344		320	4428.53	369.691	4151.68	397.287	1685.81	199.368
	0.741	0.374	0.769		330	3139.42	293.549	3539.79	237.613	5468.35	492.831																0.303	0.235	0.459	0.214	0.296		330	4579.98	382.134	4304.94	409.426	1767.06	211.753
	0.811	0.251	0.565		340	3250.94	307.288	3699.41	249.427	5654.33	508.842																0.382	0.433	0.194	0.53	0.232		340	4734.26	394.645	4457.57	421.393	1847.9	224.164
	0.715	0.185	0.534		350	3361.64	321.371	3861.22	261.584	5843.39	525.816																0.355	0.375	0.198	0.244	0.175		350	4891.05	407.64	4607.12	432.987	1928.74	236.725
	0.441	0.187	0.35		360	3472.49	335.783	4023.79	273.904	6036.51	543.677																0.477	0.267	0.27	0.831	0.19		360	5049.96	420.834	4753.84	444.141	2011.92	249.709
	0.945	0.259	0.421		370	3586.68	350.565	4187.84	286.414	6232.26	561.783																0.593	0.522	0.498	0.153	0.224		370	5211.64	434.469	4896.91	454.786	2096.63	262.95
	0.687	0.363	0.433		380	3704.18	365.795	4353.77	298.977	6427.88	579.87																0.473	0.397	0.315	0.39	0.606		380	5373.34	448.421	5035.41	464.935	2183.51	276.627
	0.937	0.11	0.489		390	3822.64	381.866	4519.74	311.294	6619.19	597.251																0.235	0.441	0.474	0.322	0.261		390	5537.06	462.778	5170.22	474.715	2270.43	290.158
	0.788	0.343	0.242		400	3941.85	398.642	4685.21	323.422	6804.5	614.025																0.348	0.943	0.493	0.526	0.136		400	5702.25	477.349	5302.56	484.401	2358.48	303.953
	0.229	0.386	1.057		410	4063.87	416.308	4850.4	335.521	6982.85	630.359																0.485	0.49	0.733	0.402	0.264		410	5866.45	492.221	5432.49	493.998	2447.71	317.989
	0.579	0.163	1.079		420	4187.52	434.273	5016.97	347.529	7150.74	646.167																0.69	0.343	0.845	0.419	0.243		420	6030.48	507.629	5559.61	503.25	2536.92	331.955
	0.362	0.238	0.928		430	4309.52	452.054	5183.3	359.512	7314.07	661.88																0.771	0.455	0.426	0.215	0.256		430	6194.29	523.421	5687.21	512.422	2625.51	345.787
	0.305	0.556	0.862		440	4430.51	469.587	5350.02	371.715	7471.81	677.973																0.739	0.316	0.163	0.261	0.282		440	6356.86	539.42	5816.32	521.614	2714.08	359.47
	0.559	0.374	1.281		450	4549.77	486.506	5516.82	383.919	7624.57	694.133																0.605	0.448	0.798	0.22	0.246		450	6520.47	555.973	5944.62	530.489	2804.11	373.664
	0.47	0.291	0.711		460	4666.77	502.822	5682.22	396.008	7775.73	710.576																0.674	0.578	0.625	0.233	0.288		460	6686.72	573.509	6073.88	539.432	2894.55	387.712
	0.315	0.391	0.689		470	4783.72	518.751	5850.1	408.146	7924.54	727.117																0.764	0.534	0.308	0.395	0.228		470	6853.51	591.298	6203.52	548.359	2985.35	401.83
	0.398	0.175	0.719		480	4900.06	534.629	6018.82	420.184	8065.06	743.261																0.625	0.292	0.361	0.267	0.488		480	7020.64	609.417	6334.02	557.423	3074.97	415.693
	0.465	0.321	1.26		490	5016.52	550.469	6187.87	432.104	8201.69	759.291																0.497	0.475	0.427	0.504	0.291		490	7186.06	627.899	6465.5	566.491	3163.72	429.181
	0.397	0.321	0.952		500	5135.07	566.841	6357.57	443.918	8332.85	774.324																0.451	0.683	0.176	0.217	0.28		500	7350.96	646.478	6595.81	575.906	3254.25	442.748
	0.332	0.46	1.014		510	5254.43	583.582	6527.2	455.75	8461.78	789.307																0.504	0.431	0.237	0.213	0.221		510	7515.2	665.318	6724.57	585.702	3344.99	455.991
	0.288	0.215	1.094		520	5373.13	600.242	6697.02	467.529	8586.21	803.97																0.696	0.253	0.232	0.24	0.386		520	7679.01	684.368	6852.39	595.607	3436.55	469.06
	0.765	0.392	1.039		530	5490.09	616.784	6866.27	479.2	8705.45	818.285																0.372	0.316	0.516	0.313	0.262		530	7840.75	703.606	6979.48	605.646	3528.46	481.696
	0.487	0.443	0.723		540	5606.48	633.039	7034.26	490.879	8822.72	832.685																0.387	0.564	0.334	0.163	0.324		540	8000.68	722.836	7104.56	615.66	3620.63	493.737
	0.488	0.93	0.963		550	5722.46	649.339	7202.41	502.47	8936.39	846.721																0.434	0.314	0.366	0.327	0.233		550	8159.1	742.06	7229.09	625.986	3712.41	505.192
	0.931	0.408	0.66		560	5835.4	665.178	7369.75	513.886	9043.64	859.898																0.612	0.297	0.405	0.213	0.117		560	8313.51	760.663	7353.44	636.773	3803.97	516.266
	0.272	0.439	0.983		570	5947.45	680.82	7535.95	525.202	9146.65	872.569																0.512	0.526	0.26	0.267	0.277		570	8465.79	779.242	7477.26	647.809	3895.8	527.024
	0.476	0.447	0.904		580	6058.73	695.875	7700.11	536.346	9246.12	884.375																0.318	0.401	0.476	0.361	0.354		580	8618.37	798.248	7599.83	659.007	3987.97	537.551
	0.329	0.406	0.245		590	6171.37	711.376	7863.07	547.318	9342.4	895.932																0.164	0.36	0.307	0.562	0.288		590	8768.39	817.129	7720.35	670.298	4079.7	547.85
	0.51	0.559	0.263																								0.101	0.646	0.559	0.233	0.323		600	8915.8	835.99	7841.24	682.302	4171.08	557.73
	0.682	0.351	0.695																								0.414	0.338	0.318	0.235	0.258
	0.49	0.283	0.741																								0.38	0.314	0.343	0.246	0.197
	0.652	0.306	0.754																								0.463	0.438	0.491	0.242	0.256
	0.274	0.304	1.144																								0.428	0.423	0.459	0.369	0.208
	0.585	0.613	0.994																								0.924	0.461	0.359	0.408	0.185
	0.656	0.116	0.986																								0.461	0.517	0.274	0.377	0.375
	0.994	0.392	0.844																								0.338	0.193	0.857	0.24	0.412
	0.767	0.253	0.894																								1.09	0.363	0.42	0.329	0.247
	0.465	0.361	0.882																								0.554	0.401	0.439	0.19	0.126
	0.391	0.356	0.787																								0.47	0.507	0.5	0.119	0.339
		0.323	0.697																								0.605	0.412	0.532	0.13	0.349
		0.432	0.411																								0.651	0.59	0.541	0.26	0.208
		0.591	0.841																								0.524	0.431	0.532	0.376	0.142
		0.232	0.424																								0.411	0.58	0.277	0.666	0.286
		0.22	0.694																								0.642	0.813	0.388	0.457	0.144
		0.239	0.83																								0.487	0.399	0.3	0.635	0.206
		0.247	1.01																								0.701	0.71	0.283	0.15	0.313
		0.219	0.369																								0.162	0.586	0.393	0.446	0.209
		0.171	0.916																								0.782	0.646	0.638	0.403	0.121
		0.217	0.273																								0.341	0.247	0.54	0.392	0.231
		0.662																									0.291	0.321	0.67	0.216	0.398
		0.667																									0.521	0.507	1.232	0.504	0.291
		0.742																									0.355	0.612	0.892	0.511	0.395
		0.38																									0.423	0.14	0.563	0.841	0.344
		0.72																									0.443	0.647	0.645	0.368	0.257
		0.731																									0.532	0.711	0.346	0.191	0.212
		0.35																									0.57	0.97	0.459	0.325	0.167
		0.266																									0.556	0.94	0.442	0.132	0.181
		0.351																									0.362	0.57	0.469	0.493	0.271
		0.515																									0.226	0.522	0.374	0.197	0.148
		0.456																									0.343	0.546	0.432	0.184	0.335
		0.342																									0.573	0.564	0.632	0.304	0.322
		0.415																									0.5	0.808	0.448	0.176	0.44
		0.393																									0.735	0.669	0.354	0.301	0.167
		0.325																									0.717	0.308	0.451	0.152	0.201
		0.366																									0.62	0.269	0.626	0.163	0.216
		0.472																									0.365	0.24	0.342	0.268	0.326
		0.542																									0.705	0.461	0.214	0.306	0.383
		0.494																									0.717	0.25	0.371	0.256	0.283
		0.374																									0.558	0.128	0.266	0.296	0.27
		0.412																									0.507	0.375	0.241	0.354	0.266
		0.699																									0.345	0.357	0.333	0.385	0.306
		0.425																									0.319	0.216	0.322	0.324	0.11
		0.466																									0.578	0.406	0.332	0.376	0.374
		0.46																									0.272	0.233	0.147	0.233	0.171
		0.43																									0.134	0.221	0.412	0.658	0.244
		0.459																									0.319	0.336	0.316	0.539	0.153
		0.534																									0.355	0.444	0.518	0.404	0.256
		0.607																									0.384	0.357	0.365		0.141
		0.541																									0.125	0.385	0.379		0.319
		0.513																									0.394	0.292	0.407		0.348
		0.194																									0.402	0.431	0.493		0.171
		0.356																									0.139	0.237	0.289		0.412
		0.635																									0.226	0.331	0.188		0.246
		0.714																									0.333	0.37	0.454		0.284
		0.625																									0.363	0.433	0.42		0.37
		0.413																									0.387	0.767	0.401		0.55
		0.332																									0.294	0.527	0.208		0.382
		0.541																									0.15	0.33	0.31		0.219
		0.318																									0.62	0.232	0.537		0.413
		0.612																									0.267	0.345	0.495		0.382
		0.523																									0.463	0.535	0.361		0.306
		0.454																									0.164	0.307			0.385
		0.636																									0.583	0.413			0.169
		0.285																									0.164	0.231			0.271
		0.592																									0.245				0.296
		0.626																									0.407				0.341
		0.298																									0.199				0.167
		0.267																									0.531				0.296
		0.458																									0.289				0.398
		0.405																									0.221				0.345
		0.774																									0.696				0.399
		0.708																									0.563				0.368
		0.4																									0.453				0.454
		0.424																									0.57				0.543
		0.613																									0.47				0.627
		0.497																									0.524				0.173
		0.522																									0.764				0.479
		0.294																									0.578				0.546
		0.534																									0.541				0.667
		0.281																									0.51
		0.682																									0.367
		0.217																									0.389
		0.197																									0.338
		0.409																									0.37
		0.417
		0.4																								Statistics	p-value
		0.486																								Kruskal-Wallis test	0.0024
		0.588																								Dunn's
		0.58																								NIH 3T3 vs M-KO #10	n.s.
		0.79																								NIH 3T3 vs M-KO #17	n.s.
		0.734																								NIH 3T3 vs MV-KO #10.6	***
		0.564																								NIH 3T3 vs MV-KO #10.9	***
		0.202																								M-KO #10 vs M-KO #17	n.s.
		0.654																								M-KO #10 vs MV-KO #10.6	***
		0.486																								M-KO #10 vs MV-KO #10.9	**
		0.435																								M-KO #17 vs MV-KO # 10.6	***
		0.649																								M-KO #17 vs MV-KO # 10.9	**
		0.47																								MV-KO #10.6 vs MV-KO #10.9	n.s.
		0.547
		0.435																								*	< 0.05
		0.672																								**	< 0.01
		0.673																								***	< 0.001
		0.305																								n.s.	> 0.05
Statistics	p-value
Kruskal-Wallis test	< 0.0001
Dunn's
MVD7 vs MVE-KO	***
MVD7 vs Evl rescue	n.s.
MVE-KO vs Evl rescue	***
*	< 0.05
**	< 0.01
***	< 0.001
n.s.	> 0.05
