# Supplementary material for: Loss of Ena/VASP interferes with lamellipodium architecture, motility and integrin-dependent adhesion
Source: eLife. 2020 May 11;9:e55351. doi: 10.7554/eLife.55351 (PMC7239657; doi:10.7554/eLife.55351)
Supplement: Figure 3—figure supplement 1—source data 1. [file elife-55351-fig3-figsupp1-data1.xlsx]

## Sheet: Sheet1
Source Data Figure 3-figure supplement 1			Figure 3-figure supplement 1. Expression of Evl and Mena is sufficient for rescuing lamellipodial parameters in B16-F1 cells
Figure 3-figure supplement 1 B						Figure 3-figure supplement 1 C
Phalloidin intensity in lamellipodium in %						Lamellipodium width in µm
Statistics see below dataset						Statistics see below dataset
Cell line	B16-F1	EVM-KO	Evl rescue	Mena rescue		Cell line	B16-F1	EVM-KO	Evl rescue	Mena rescue
Mean	100	69.4784	83.5654	80.3437		Mean	2.57935	0.682244	1.89133	1.5887
Median	103.7	68.68	83.8	78.42		Median	2.608	0.6605	1.86	1.391
SD	16.2095	14.4323	16.049	22.6913		SD	0.638491	0.24967	0.728334	0.703204
SEM	2.292	2.041	2.27	3.209		SEM	0.0903	0.3531	0.103	0.09945
25 % Percentil	87.9	58.26	74.2	61.81		25 % Percentil	2.134	0.5155	1.281	1.174
75 % Percentil	112.4	79.04	93.12	94.32		75 % Percentil	3.028	0.8343	2.454	1.799
C.I. of mean	4.607	4.102	4.561	6.449		C.I. of mean	0.181	0.071	0.207	0.2
n	50	50	50	50		n	50	50	50	50
	110.587	111.42	108.664	109.777			2.613	0.5676	2.1637	3.9297
	89.5471	72.6363	102.785	71.6419			1.7997	0.8653	2.6598	1.273
	105.181	57.3487	92.9222	88.9115			2.1442	0.7263	1.309	2.7671
	112.147	76.624	103.99	67.1688			2.5136	0.8653	3.4035	1.3802
	93.547	74.3753	83.1499	68.6837			2.1622	0.5548	2.9363	1.7793
	125.305	64.7481	96.991	40.2179			2.7193	1.1589	1.9393	1.3274
	87.0323	50.5186	89.5416	98.919			2.105	1.0056	1.0502	2.1783
	73.0587	48.3369	34.6561	68.1009			1.3982	1.1168	1.168	0.9701
	112.533	68.3832	79.079	72.4826			2.7921	1.1589	1.1083	1.8123
	114.668	70.0694	84.444	89.4936			3.2911	0.3497	0.6548	1.5294
	87.5874	56.6758	83.0079	62.1			2.3592	0.6753	2.8398	1.5307
	103.287	51.7729	53.9496	74.665			2.9507	0.5715	1.4085	1.3246
	94.1853	82.6899	119.107	94.1095			1.784	0.65	1.2525	2.1744
	90.3079	55.6489	85.6583	103.261			2.061	0.9519	0.9993	2.9238
	101.027	63.5973	98.517	70.6414			3.3477	1.5788	1.1448	0.8481
	75.0466	106.899	79.692	123.599			2.6618	0.5523	1.933	0.686
	117.156	56.0319	113.858	95.2614			1.2105	1.0613	1.855	1.2708
	124.874	87.4336	49.6317	94.9706			2.5283	0.8398	1.7383	2.54
	113.262	65.2118	60.9821	71.6442			1.854	0.7548	1.3893	1.5315
	104.83	57.7388	94.3037	53.5683			1.6313	0.6725	1.4098	1.4055
	126.46	58.8125	86.153	57.4868			2.4088	0.7223	2.855	1.553
	81.356	61.1853	84.6572	84.2434			2.0568	0.8905	1.9048	1.3935
	115.741	72.1378	69.3148	138.72			3.0898	0.6895	1.0508	1.1835
	61.6777	41.6093	74.4902	116.133			2.267	0.502	2.3198	1.7523
	114.277	56.855	88.7538	129.246			3.2368	0.6853	2.0845	4.0533
	109.318	82.2745	90.9277	59.7407			2.704	0.538	1.1438	2.0685
	86.1702	59.6501	93.6999	47.6388			3.414	0.5813	1.7603	2.2465
	87.4905	86.2256	56.5414	80.6782			3.2695	0.4678	3.0655	1.5515
	78.9331	79.1631	102.942	58.3899			3.0195	0.4838	1.2902	1.2183
	103.409	78.9991	73.6095	50.584			1.697	0.684	1.2557	1.7283
	67.7995	88.3875	79.2629	86.1362			2.4278	0.7603	2.187	0.9133
	94.321	69.6646	85.1916	117.352			3.1568	0.7353	1.832	2.336
	109.435	72.5605	76.9794	66.9057			3.016	0.576	2.304	1.801
	109.633	49.3227	91.6233	88.7984			3.0973	0.671	2.461	1.7978
	92.0579	73.295	74.0245	86.4825			2.645	0.4083	2.691	1.2942
	107.195	77.399	83.068	93.1179			2.4082	0.6905	2.706	1.3898
	118.425	75.1581	85.7703	76.1683			4.4795	0.584	0.992	1.0402
	97.6363	68.9829	71.8295	70.732			3.0543	0.4418	0.915	1.1105
	88.0077	52.9414	74.2629	93.7607			3.941	0.4553	1.994	1.2023
	112.42	65.5581	71.567	70.6679			3.3995	0.2733	1.571	1.3243
	103.935	87.9638	87.1632	50.6713			2.204	0.4265	1.864	1.0438
	121.192	60.9111	80.5447	48.5967			1.8715	0.6408	1.517	1.4205
	115.797	88.35	73.4947	60.9293			2.705	0.52	1.29	1.2455
	75.1744	67.2712	104.065	50.0991			2.9623	0.8325	1.486	0.7065
	110.04	72.7371	73.5315	54.8123			2.285	0.6145	4.021	0.8443
	69.9265	58.4289	78.4352	85.9818			2.7645	0.5643	2.451	1.3825
	111.986	79.1511	78.8851	96.8697			2.1822	0.4825	2.183	1.1463
	98.0694	86.9003	103.162	100.142			2.6023	0.2943	2.602	1.0243
	89.887	63.4548	89.9185	87.5998			2.0583	0.8398	2.512	1.3928
	107.061	60.4084	79.4673	89.2857			2.6168	0.3793	1.894	1.0883
Statistics	p-value					Statistics	p-value
Kruskal-Wallis test	< 0.0001					Kruskal-Wallis test	< 0.0001
Dunn's						Dunn's
B16-F1 vs EVM-KO	***					B16-F1 vs EVM-KO	***
B16-F1 vs Evl rescue	***					B16-F1 vs Evl rescue	**
B16-F1 vs Mena rescue	***					B16-F1 vs Mena rescue	***
EVM-KO vs Evl rescue	***					EVM-KO vs Evl rescue	***
EVM-KO vs Mena rescue	*					EVM-KO vs Mena rescue	***
Evl rescue vs Mena rescue	n.s.					Evl rescue vs Mena rescue	n.s.
*	< 0.05					*	< 0.05
**	< 0.01					**	< 0.01
***	< 0.001					***	< 0.001
n.s.	> 0.05					n.s.	> 0.05
