# Supplementary material for: Loss of Ena/VASP interferes with lamellipodium architecture, motility and integrin-dependent adhesion
Source: eLife. 2020 May 11;9:e55351. doi: 10.7554/eLife.55351 (PMC7239657; doi:10.7554/eLife.55351)
Supplement: Figure 3—source data 1. [file elife-55351-fig3-data1.xlsx]

## Sheet: Sheet1
Source Data Figure 3	Figure 3. Loss of Ena/VASP perturbs lamellipodia and abrogates microspike formation in B16-F1 cells
Figure 3 B					Figure 3 C					Figure 3 E					Figure 3 E
Phalloidin intensity in lamellipodium in %					Lamellipodium width in µm					Microspikes per cell					Microspike length in µm
Statistics see below dataset					Statistics see below dataset					Statistics see below dataset					Statistics see below dataset
Cell line	B16-F1	EVM-KO	VASP rescue		Cell line	B16-F1	EVM-KO	VASP rescue		Cell line	B16-F1	EVM-KO	VASP rescue		Cell line	B16-F1	EVM-KO	VASP rescue
Mean	100	54.7228	139.043		Mean	2.30171	0.798684	2.677		Mean	20	0.96	15.46		Mean	2.25062	1.22528	1.99528
Median	94.56	54.64	136.4		Median	2.285	0.7339	0.2558		Median	19.5	0.5	15		Median	2.201	1.252	1.861
SD	27.5809	15.0922	34.542		SD	0.728198	0.212769	0.853967		SD	9.94475	1.30868	7.08609		SD	0.993252	0.40417	0.92376
SEM	3.901	2.134	4.885		SEM	0.103	0.03009	0.1208		SEM	1.406	0.1851	1.002		SEM	0.093	0.06472	0.08218
25 % Percentil	81.63	44.65	107.9		25 % Percentil	1.718	0.6474	2.106		25 % Percentil	12.75	0	9.75		25 % Percentil	1.506	0.8159	0.1372
75 % Percentil	112.1	60.28	168.3		75 % Percentil	2.726	0.9588	3.307		75 % Percentil	27.25	2	21		75 % Percentil	2.769	1.455	2.539
C.I. of mean	7.838	4.289	9.817		C.I. of mean	0.207	0.0605	0.243		C.I. of mean	2.826	0.372	2.014		C.I. of mean	0.185	0.131	0.163
n	50	50	50		n	50	50	50		n	50	50	50		n	100	39	100
	123.068	94.4306	114.04			3.9181	0.5785	3.674			17	0	8			2.6113	1.3572	1.3468
	105.275	55.2513	196.816			2.5541	0.7157	3.995			27	1	34			1.2347	2.233	2.2841
	107.37	73.433	118.373			4.4538	0.6553	2.529			35	1	19			1.9476	1.2803	1.5973
	184.461	53.4907	137.033			2.3121	0.7118	2.847			23	6	19			2.2832	1.5865	2.893
	78.5259	77.4015	195.456			2.3363	0.7463	1.58			32	0	22			1.0198	1.2721	1.4891
	122.561	73.6869	150.061			1.5534	0.625	1.445			23	0	19			2.4951	0.9845	1.3682
	57.8205	57.4706	179.451			2.4914	0.5789	3.264			28	1	19			2.3631	0.8385	2.914
	87.201	52.9855	167.351			2.3022	0.5627	3.224			27	0	22			3.1227	1.7639	2.4078
	116.25	57.6537	114.352			2.6843	0.8865	2.798			14	0	18			1.356	0.8159	1.3
	95.0163	58.498	180.246			2.9712	0.9815	2.572			9	0	15			1.8163	0.7211	0.8653
	179.508	48.5237	91.5146			2.722	0.8215	1.969			37	2	15			3.9939	0.7354	2.9904
	77.1835	44.9188	137.462			2.8628	0.6731	2.164			25	4	26			2.299	1.7991	2.5396
	132.758	41.1434	121.693			1.5534	0.5627	2.18			34	2	13			2.3195	0.8385	3.5799
	97.3526	45.9763	91.0461			2.065	0.9233	2.251			22	1	29			2.6477	1.356	1.8164
	69.5183	55.89	97.5024			2.4898	0.856	3.629			31	3	15			1.5099	0.7978	2.5361
	111.487	51.7922	128.821			2.8563	0.5644	3.464			1	0	26			1.6125	1.0677	2.8106
	84.2329	52.6699	136.053			2.2905	0.6751	2.191			13	1	24			2.5592	1.2523	4.488
	106.594	81.2934	192.945			2.065	0.6832	2.151			12	0	16			2.5054	0.8082	0.9167
	90.8553	57.0734	189.797			2.722	0.7794	3.604			19	0	16			1.9912	1.4494	3.0728
	54.0614	55.8373	127.109			2.1441	0.6549	4.043			13	1	10			0.9696	0.6856	2.6406
	83.4228	58.6502	128.208			2.7365	1.0038	2.82			12	1	7			2.647	0.8082	0.9065
	69.4043	58.0015	180.497			2.0397	0.6238	1.811			10	0	12			1.0519	0.7767	1.4906
	78.593	71.2989	129.476			1.4146	0.9615	4.36			19	2	13			2.3918	0.8082	2.3507
	89.6855	32.6607	171.096			1.6444	0.6832	2.7			9	1	23			0.9825	1.05	2.1569
	160.177	60.9702	87.0396			1.3606	0.9154	2.644			25	0	21			2.2013	1.3924	3.8343
	87.9146	58.873	106.302			1.4322	0.6624	3.355			20	0	8			2.81	1.2118	1.6287
	123.415	87.9003	146.54			1.7211	0.8429	1.29			24	0	9			1.5387	1.4552	1.3288
	88.2349	86.0543	233.67			1.2721	0.7147	1.963			18	0	10			2.4177	0.9761	1.48
	82.809	63.0435	163.347			2.0243	1.2721	2.64			31	0	15			1.6733	1.7819	0.7874
	107.963	54.0247	152.967			2.4177	1.0198	2.233			40	1	12			2.1157	1.3297	2.3594
	105.087	49.7606	119.463			1.7546	0.6923	2.969			18	0	9			1.2272	1.3789	1.8705
	95.3258	43.8268	94.726			2.2566	0.7354	3.875			33	0	4			4.7054	1.9552	3.3446
	81.7462	64.8459	126.687			1.7077	0.9073	2.687			17	0	14			4.9521	0.755	1.5044
	139.596	65.6582	171.018			1.7886	1.2059	2.471			18	2	16			2.7162	1.8203	0.6353
	56.1782	35.8529	91.0445			3.722	0.9845	3.291			32	0	5			4.1163	0.9158	1.5931
	83.1857	38.013	108.123			3.354	1.3382	3.75			5	0	2			2.2014	1.4598	2.1361
	107.01	35.8031	138.178			1.3234	1.0613	2.544			36	1	22			2.428	1.306	0.8195
	80.2612	42.2389	144.299			1.8072	1.0963	1.952			2	1	11			0.7211	1.7943	3.6674
	94.0972	56.9104	183.22			1.0965	0.9579	1.277			23	0	21			2.2859	1.1673	1.0437
	79.616	38.744	154.228			1.6125	0.6115	1.87			7	2	8			2.7794		1.4087
	88.9207	58.9177	121.025			3.1453	0.7608	4.988			14	0	18			1.7743		0.9167
	140.217	38.5158	105.246			3.186	0.7186	3.883			6	2	8			1.3297		2.1317
	81.2657	48.7176	99.4585			2.1	0.9167	1.605			13	3	9			1.0579		1.1858
	116.832	52.2466	136.804			1.1998	1.0277	1.51			26	0	26			2.921		2.4144
	107.522	46.9176	107.413			2.2795	0.7323	1.739			21	4	3			2.1441		2.9878
	87.7259	45.4271	144.249			2.7159	0.5413	2.378			14	0	10			3.3827		0.8082
	79.8541	19.1619	171.229			2.3995	0.5978	2.713			30	1	20			4.8103		1.5102
	106.452	60.0465	105.391			2.239	0.3282	2.308			12	0	17			1.3545		1.1752
	113.78	33.0621	101.686			3.2256	0.5974	2.298			20	2	22			1.4146		2.8563
	102.609	40.5777	162.419			2.7607	1.1874	2.352			3	2	13			1.7211		1.5746
																4.2768		1.3848
Statistics	p-value				Statistics	p-value				Statistics	p-value					2.1834		2.2297
Kruskal-Wallis test	< 0.0001				Kruskal-Wallis test	< 0.0001				Kruskal-Wallis test	< 0.0001					2.6088		3.1192
Dunn's					Dunn's					Dunn's						1.5044		1.1175
B16-F1 vs EVM-KO	***				B16-F1 vs EVM-KO	***				B16-F1 vs EVM-KO	***					2.1204		1.784
B16-F1 vs VASP rescue	***				B16-F1 vs VASP rescue	n.s.				B16-F1 vs VASP rescue	n.s.					0.8744		1.1628
EVM-KO vs VASP rescue	***				EVM-KO vs VASP rescue	***				EVM-KO vs VASP rescue	***					3.2811		1.8616
																2.8409		1.8094
*	< 0.05				*	< 0.05				*	< 0.05					1.177		3.091
**	< 0.01				**	< 0.01				**	< 0.01					2.0058		2.1711
***	< 0.001				***	< 0.001				***	< 0.001					2.7221		2.6653
n.s.	> 0.05				n.s.	> 0.05				n.s.	> 0.05					2.2048		1.05
																1.4322		3.2725
																2.1181		1.7607
																2.2804		2.567
																2.3355		1.9058
																1.276		1.548
																1.6444		0.9523
																1.05		2.3241
																3.2613		1.6473
																2.6205		2.1014
																0.6353		1.7639
																1.6413		2.3795
																1.9066		0.8773
																3.0902		1.0401
																2.8668		2.4812
																3.4422		1.3648
																0.9845		1.4654
																0.5947		2.065
																3.3658		2.1119
																1.1135		3.4833
																2.2649		2.4246
																2.9739		3.6233
																2.0899		1.2944
																1.8497		2.0975
																1.7787		2.6984
																3.8123		1.5889
																1.2825		1.8101
																3.1718		2.8824
																0.9235		1.6733
																2.2436		2.1425
																3.0803		0.645
																2.9571		2.1
																1.4313		2.3717
																2.0005		1.8611
																1.935		1.6333
																3.2167		2.6615
																1.8909		0.7238
																2.738		2.9373
																2.9268		1.6162
															Statistics	p-value
															Kruskal-Wallis test	< 0.0001
															Dunn's
															B16-F1 vs EVM-KO	***
															B16-F1 vs VASP rescue	n.s.
															EVM-KO vs VASP rescue	***
															*	< 0.05
															**	< 0.01
															***	< 0.001
															n.s.	> 0.05
