# Supplementary material for: Loss of Ena/VASP interferes with lamellipodium architecture, motility and integrin-dependent adhesion
Source: eLife. 2020 May 11;9:e55351. doi: 10.7554/eLife.55351 (PMC7239657; doi:10.7554/eLife.55351)
Supplement: Figure 4—figure supplement 1—source data 1. [file elife-55351-fig4-figsupp1-data1.xlsx]

## Sheet: Sheet1
Source Data Figure 4-figure supplement 1			Figure 4-figure supplement 1. Quantification of microspikes after rescue of EVM-KO cells with EGFP-tagged Evl or Mena
Figure 3 A						Figure 3 B
Microspikes per cell						Microspike length in µm
Statistics see below dataset						Statistics see below dataset
Cell line	B16-F1	EVM-KO	Evl rescue	Mena rescue		Cell line	B16-F1	EVM-KO	Evl rescue	Mena rescue
Mean	19.58	0.6	12.52	10.42		Mean	2.83038	1.23074	2.38746	3.42818
Median	19	0	13	9		Median	2.619	1.239	2.206	2.785
SD	6.42727	0.782461	5.09197	5.37223		SD	0.899978	0.394695	0.826057	1.47694
SEM	0.909	0.111	0.72	0.76		SEM	0.0945	0.076	0.0841	0.153
25 % Percentil	16	0	9	6		25 % Percentil	2.194	0.95	1.728	2.111
75 % Percentil	24	1	16	14		75 % Percentil	3.301	1.361	2.873	4.137
C.I. of mean	1.827	0.222	1.447	1.527		C.I. of mean	0.188	0.156	0.167	0.304
n	50	50	50	50		n	50	27	50	50
	20	0	16	17			2.199	1.489	2.428	2.193
	11	2	9	11			3.147	1.989	4.011	1.847
	11	0	11	15			2.116	1.05	1.714	1.163
	14	1	10	13			3.775	1.096	2.001	5.654
	20	1	7	19			1.778	1.141	1.612	4.285
	24	0	14	12			4.068	0.917	2.316	2.973
	33	1	20	6			0.898	0.821	3.092	8.162
	19	1	13	7			1.597	0.859	1.703	4.59
	19	2	3	8			3.36	1.241	2.831	5.801
	18	0	16	6			5.137	0.551	2.235	2.902
	27	2	22	12			3.184	1.918	1.915	4.921
	21	0	16	7			2.774	0.898	1.779	2.098
	32	3	8	11			3.163	0.465	1.811	1.924
	13	0	6	20			4.558	0.841	2.224	2.272
	19	1	3	4			2.594	1.096	1.064	4.907
	27	0	5	7			2.304	1.835	2.891	4.907
	9	0	9	9			2.9	1.252	2.007	2.603
	32	1	18	29			2.235	1.239	2.379	1.827
	16	0	7	11			2.08	1.98	3.236	3.988
	9	0	16	14			4.794	1.306	2.405	6.874
	17	0	8	5			3.297	1.064	3.08	2.516
	19	0	15	16			2.948	1.596	2.136	3.715
	14	1	3	16			3.238	1.342	1.965	5.233
	16	0	15	9			2.438	1.29	1.918	2.061
	24	2	20	9			3.96	1.361	2.191	3.17
	20	1	12	8			2.21	1.232	3.153	4.772
	16	0	19	17			1.267	1.361	2.624	1.789
	10	1	15	20			2.569		2.239	2.644
	16	1	3	7			3.351		1.992	2.856
	26	0	15	14			3.746		1.304	2.529
	10	0	20	10			2.762		1.979	3.875
	22	0	13	6			2.609		4.33	2.6
	33	1	16	6			2.019		3.139	2.635
	18	2	8	9			2.418		1.87	2.478
	20	0	19	4			2.214		1.688	2.625
	22	0	10	4			3.225		3.06	2.701
	25	1	15	17			2.311		1.737	1.94
	22	1	12	8			2.625		1.884	4.072
	26	1	18	11			3.491		1.717	4.084
	14	0	16	5			3.304		4.155	4.696
	12	0	15	8			3.583		3.764	1.653
	13	0	14	6			1.762		2.389	3.512
	19	0	10	6			2.217		1.368	4.126
	19	0	9	8			2.755		1.615	2.183
	16	0	11	12			2.505		1.415	5.385
	20	1	19	16			2.269		2.452	2.621
	16	2	18	14			2.683		2.529	3.8
	31	0	7	2			4.867		4.865	4.412
	22	0	10	5			2.162		3.262	1.602
	27	0	12	5			2.053		1.899	3.233
							2.942		2.468	2.137
Statisitcs	p-value						2.897		2.827	2.49
Kruskal-Wallis test	< 0.0001						2.769		2.652	1.714
Dunn's							3.758		1.224	2.722
B16-F1 vs EVM-KO	***						1.56		4.321	4.148
B16-F1 vs Evl rescue	**						1.688		2.109	3.663
B16-F1 vs Mena rescue	***						3.224		3.356	3.209
EVM-KO vs Evl rescue	***						1.539		2.011	2.113
EVM-KO vs Mena rescue	***						2.472		3.473	1.935
Evl rescue vs Mena rescue	n.s.						3.077		3.486	3.52
							3.357		1.793	2.11
*	< 0.05						4.859		3.491	2.829
**	< 0.01						2.239		1.72	2.41
***	< 0.001						4.283		2.856	2.323
n.s.	> 0.05						2.122		2.707	2.785
							4.185		1.969	1.848
							2.073		1.708	4.679
							4.572		2.97	1.938
							2.798		2.893	3.761
							2.289		1.807	1.875
							2.163		1.624	4.59
							3.632		3.848	1.522
							2.372		2.722	3.669
							2.224		1.367	1.936
							1.992		2.618	6.625
							3.264		1.845	3.953
							1.987		3.576	2.845
							2.721		1.163	2.874
							2.614		1.522	4.96
							2.193		2.253	4.569
							1.677		2.206	6.764
							3.548		2.73	1.743
							2.319		1.246	7.416
							5.613		3.285	3.881
							1.415		2.354	2.164
							1.833		3.345	1.459
							1.323		2.206	1.847
							2.41		2.829	1.553
							3.173		1.779	1.008
							2.691		1.717	2.221
							3.364		1.368	2.431
							2.874		3.72	1.539
							1.703		1.292	2.6
							4.622		1.073	3.347
							1.752		1.367	5.431
							4.825		0.777	7.067
							2.645		2.8	2.785
							2.28		1.001	5.977
							2.524		2.059	1.91
							2.194		1.924	2.765
						Statisitcs	p-value
						Kruskal-Wallis test	< 0.0001
						Dunn's
						B16-F1 vs EVM-KO	***
						B16-F1 vs Evl rescue	**
						B16-F1 vs Mena rescue	n.s.
						EVM-KO vs Evl rescue	***
						EVM-KO vs Mena rescue	***
						Evl rescue vs Mena rescue	***
						*	< 0.05
						**	< 0.01
						***	< 0.001
						n.s.	> 0.05
