# Supplementary material for: Loss of Ena/VASP interferes with lamellipodium architecture, motility and integrin-dependent adhesion
Source: eLife. 2020 May 11;9:e55351. doi: 10.7554/eLife.55351 (PMC7239657; doi:10.7554/eLife.55351)
Supplement: Figure 4—figure supplement 2—source data 1. [file elife-55351-fig4-figsupp2-data1.xlsx]

## Sheet: Sheet1
Source Data Figure 4-figure supplement 2		Figure 4-figure supplement 2. Active FMNL2 or -3 do not rescue microspikes in EVM-KO cell
Figure 4-figure supplement 2B						Figure 4-figure supplement 2C
Microspikes per cell						Microspike length (µm)
Statistics see below dataset						Statistics see below dataset
Cell line	B16-F1	EVM-KO	FMNL2 rescue	FMNL3 rescue		Cell line	B16-F1	EVM-KO	FMNL2 rescue	FMNL3 rescue
Mean	20.72	0.44	0.4	0.56		Mean	2.565	1.391	1.347	1.072
Median	18	0	0	0		Median	2.385	1.316	1.26	0.1049
SD	6.484	0.768	0.816	0.821		SD	0.87	0.294	0.498	0.349
SEM	1.297	0.154	0.163	1.64		SEM	0.087	0.0888	0.157	0.0932
25 % Percentil	15.75	0	0	0		25 % Percentil	2.008	1.211	1.128	0.841
75 % Percentil	25	1	0.25	1		75 % Percentil	2.939	1.498	1.533	1.227
C.I. of mean	2.676	0.317	0.337	0.339		C.I. of mean	0.173	0.198	0.359	0.201
n	25	25	25	25		n	100	11	10	14
	17	0	0	0			2.569	1.182	1.239	1.241
	30	2	0	0			2.224	1.543	0.777	0.939
	25	0	0	1			1.385	1.601	1.682	0.639
	17	0	2	0			2.158	1.11	1.323	1.003
	15	2	0	2			2.61	1.304	1.128	0.608
	39	0	0	0			3.254	1.11	2.529	1.5
	15	0	3	2			1.612	1.298	1.533	0.967
	15	2	0	0			2.569	1.316	1.28	1.095
	16	0	0	1			1.759	2.147	0.848	0.735
	15	0	0	0			3.987	1.361	1.128	0.841
	24	0	1	0			2.053	1.328		1.102
	20	0	0	1			3.107			1.924
	21	0	1	2			1.936			1.186
	18	0	0	0			2.025			1.227
	30	0	0	0			1.342
	26	2	0	2			2.694
	22	0	0	0			5.818
	13	1	0	0			2.575
	16	1	0	2			5.127
	16	0	0	0			2.323
	29	0	2	0			3.572
	14	1	1	0			1.368
	23	0	0	0			2.568
	25	0	0	0			4.552
	17	0	0	1			2.97
							3.023
Statisitcs	p-value						1.843
Kruskal-Wallis test	< 0.0001						1.304
Dunn's							2.049
B16-F1 vs EVM-KO	***						1.673
B16-F1 vs FMNL2 rescue	***						2.799
B16-F1 vs FMNL3 rescue	***						1.959
EVM-KO vs FMNL2 rescue	n.s.						2.973
EVM-KO vs FMNL3 rescue	n.s.						3.909
FMNL2 rescue vs FMNL3 rescue	n.s.						2.988
							3.22
***	< 0.001						2.129
n.s.	> 0.05						2.168
							2.862
							1.843
							3.121
							2.998
							1.489
							2.273
							2.954
							1.729
							1.816
							2.841
							4.781
							2.507
							1.833
							2.611
							4.379
							2.219
							2.465
							2.831
							2.061
							5.019
							1.693
							3.622
							2.015
							2.515
							2.153
							2.726
							2.497
							2.337
							2.529
							2.466
							1.533
							2.308
							2.266
							2.915
							2.239
							1.824
							2.206
							1.475
							3.742
							2.899
							1.442
							3.181
							1.737
							2.713
							2.923
							2.425
							3.411
							2.345
							2.221
							2.224
							1.977
							1.703
							2.236
							2.077
							3.961
							2.618
							2.084
							2.3
							2.548
							1.771
							3.785
							2.001
						Statisitcs	p-value
						Kruskal-Wallis test	< 0.0001
						Dunn's
						B16-F1 vs EVM-KO	***
						B16-F1 vs FMNL2 rescue	***
						B16-F1 vs FMNL3 rescue	***
						EVM-KO vs FMNL2 rescue	n.s.
						EVM-KO vs FMNL3 rescue	n.s.
						FMNL2 rescue vs FMNL3 rescue	n.s.
						***	< 0.001
						n.s.	> 0.05
