# Supplementary material for: Loss of Ena/VASP interferes with lamellipodium architecture, motility and integrin-dependent adhesion
Source: eLife. 2020 May 11;9:e55351. doi: 10.7554/eLife.55351 (PMC7239657; doi:10.7554/eLife.55351)
Supplement: Figure 4—source data 1. [file elife-55351-fig4-data1.xlsx]

## Sheet: Sheet1
Source Data Figure 4	Figure 4. Microspike formation is exclusively rescued by all three Ena/VASP members, but not by active Rif-L77, myosin X, active mDia2DAD or active FMNL2 and -3
Figure 4 C				Figure 4 E
Filopodia per cell				Filopodia per cell
Statistics see below dataset				Statistics see below dataset
Cell line	B16-F1	EVM-KO		Cell line	B16-F1	EVM-KO
Mean	22.1789	14.6829		Mean	149.3	147.8
Median	20	14		Median	135.5	127.5
SD	8.924	6.14813		SD	52.8816	70.0723
SEM	0.916	0.679		SEM	7.579	9.91
25 % Percentil	16	10		25 % Percentil	114	99
75 % Percentil	28	18		75 % Percentil	192	188
C.I. of mean	1.818	1.351		C.I. of mean	15.029	19.914
n	95	82		n	50	50
	10	8			78	255
	18	10			116	108
	26	10			144	127
	32	20			114	83
	12	6			247	154
	14	22			121	164
	24	16			119	150
	19	9			194	114
	21	11			143	81
	16	11			258	108
	14	13			102	188
	10	11			138	236
	12	7			201	145
	15	8			187	57
	17	10			214	114
	15	13			131	96
	27	12			94	102
	23	21			207	278
	11	18			54	89
	29	20			233	115
	17	13			210	128
	24	10			140	82
	19	12			186	123
	20	12			113	191
	17	23			142	157
	20	11			110	140
	17	14			148	294
	13	15			252	112
	26	16			199	171
	46	28			192	183
	10	8			173	388
	28	14			230	115
	26	31			89	48
	16	37			125	65
	37	15			178	114
	14	10			130	72
	8	21			122	203
	8	19			79	99
	38	19			162	66
	25	17			64	215
	8	15			133	237
	12	26			103	185
	31	14			128	69
	12	19			261	107
	33	12			123	151
	19	9			114	158
	29	18			110	199
	14	12			100	268
	20	22			138	93
	16	13			116	193
	15	9
	17	4		Statistics	p-value
	21	8		Mann-Whitney rank sum test	n.s.
	17	10		B16-F1 vs EVM-KO	0.484
	23	16
	28	15
	35	17
	12	17
	22	9
	14	18
	40	14
	28	13
	22	15
	22	11
	22	18
	26	19
	20	31
	17	11
	20	18
	32	23
	13	13
	18	16
	43	4
	29	20
	41	5
	28	15
	16	10
	39	19
	17	6
	16	11
	21	14
	33	14
	27
	18
	25
	26
	32
	37
	28
	19
	15
	32
	45
	30
	18
Statistics	p-value
Mann-Whitney rank sum test	***
B16-F1 vs EVM-KO	< 0.001
