# Supplementary material for: Loss of Ena/VASP interferes with lamellipodium architecture, motility and integrin-dependent adhesion
Source: eLife. 2020 May 11;9:e55351. doi: 10.7554/eLife.55351 (PMC7239657; doi:10.7554/eLife.55351)
Supplement: Figure 5—figure supplement 1—source data 1. [file elife-55351-fig5-figsupp1-data1.xlsx]

## Sheet: Sheet1
Source Data Figure 5-figure supplement 1			Figure 5-figure supplement 1. Loss of Ena/VASP affects additional lamellipodial parameters
Figure 5-figure supplement 1 A						Figure 5-figure supplement 1 B						Figure 5-figure supplement 1 E						Figure 5-figure supplement 1 F						Figure 5-figure supplement 1 H							Figure 5-figure supplement 1 I							Figure 5-figure supplement 1 I
p16 intensity in lamellipodium in %						p16 signal width in µm						CP intensity in lamellipodium in %						CP signal width in µm						Cortactin intensity in lamellipodium in %							Cortactin signal width in µm							WAVE2 intensity in lamellipodium in %
Statistics see below dataset						Statistics see below dataset						Statistics see below dataset						Statistics see below dataset						Statistics see below dataset							Statistics see below dataset							Statistics see below dataset
Cell line	B16-F1	EVM-KO	Evl rescue	Mena rescue		Cell line	B16-F1	EVM-KO	Evl rescue	Mena rescue		Cell line	B16-F1	EVM-KO	Evl rescue	Mena rescue		Cell line	B16-F1	EVM-KO	Evl rescue	Mena rescue		Cell line	B16-F1	EVM-KO	VASP rescue	Evl rescue	Mena rescue		Cell line	B16-F1	EVM-KO	VASP rescue	Evl rescue	Mena rescue		Cell line	B16-F1	EVM-KO
Mean	100	173.592	91.8584	162.021		Mean	1.26244	0.399354	0.91115	0.745734		Mean	100	179.507	128.681	128.397		Mean	1.23584	0.500498	1.11944	0.98922		Mean	100.479	160.453	73.1458	113.133	110.44		Mean	1.66046	0.545014	1.41106	1.45668	1.27262		Mean	100	101.76
Median	95.27	171.874	86.835	146.666		Median	1.235	0.377	0.861	0.728		Median	101.714	172.146	126.394	118.875		Median	1.204	0.501	1.074	0.939		Median	102.354	158.683	71.811	112.299	105.763		Median	1.672	0.526	1.287	1.463	1.081		Median	98.265	100.97
SD	35.0027	43.1503	39.1976	67.4623		SD	0.333749	0.0965703	0.418414	0.255513		SD	29.6355	42.7236	40.7216	40.3166		SD	0.328447	0.109842	0.440191	0.263849		SD	28.0901	20.4491	30.0167	41.0639	36.2145		SD	0.698255	0.137167	0.594539	0.582884	0.576489		SD	20.402	22.739
SEM	4.95	6.102	5.543	9.541		SEM	0.0472	0.0137	0.0592	0.0361		SEM	4.191	6.042	5.759	5.702		SEM	0.0464	0.0155	0.0632	0.0373		SEM	3.973	2.892	4.245	5.807	5.122		SEM	0.0987	0.0184	0.0841	0.0824	0.0815		SEM	1.862	2.076
25 % Percentil	80.846	153.204	59.36	108.644		25 % Percentil	1.073	0.377	0.647	0.588		25 % Percentil	83.386	146.358	98.502	100.269		25 % Percentil	0.979	0.43	0.868	0.808		25 % Percentil	75.913	144.829	54.479	79.567	91.078		25 % Percentil	1.195	0.438	0.944	1.047	0.85		25 % Percentil	85.629	86.14
75 % Percentil	117.374	203.247	115.077	213.465		75 % Percentil	1.503	0.445	1.129	0.938		75 % Percentil	108.272	207.287	153.974	158.987		75 % Percentil	1.422	0.552	1.283	1.125		75 % Percentil	120.259	176.924	88.271	148.036	138.58		75 % Percentil	2.005	0.638	1.716	1.681	1.494		75 % Percentil	113.356	117.463
C.I. of mean	9.948	12.263	11.14	19.173		C.I. of mean	0.0949	0.0274	0.119	0.0726		C.I. of mean	8.422	12.142	11.573	11.458		C.I. of mean	0.0933	0.0312	0.125	0.075		C.I. of mean	7.983	5.812	8.531	11.67	10.292		C.I. of mean	0.198	0.039	0.169	0.166	0.164		C.I. of mean	3.688	4.11
n	50	50	50	50		n	50	50	50	50		n	50	50	50	50		n	50	50	50	50		n	50	50	50	50	50		n	50	50	50	50	50		n	50	50
	110.114	154.062	69.6607	99.2141			1.2315	0.5225	1.7585	1.056			86.9284	201.377	143.607	64.3015			1.3968	0.539	1.229	0.8075			97.6124	131.363	49.2663	51.3773	144.586			1.8368	0.4903	1.2165	1.2783	0.9235			132.98	136.299
	53.5832	224.686	79.5926	271.975			1.0498	0.485	2.1208	0.7055			79.6016	171.956	131.255	83.7667			0.8652	0.5083	2.677	0.8003			73.4758	142.387	70.9419	145.215	145.819			1.6463	0.7785	2.0475	1.2133	0.7213			132.054	92.226
	119.983	155.425	52.8359	199.107			1.5033	0.3645	1.4913	0.8585			127.515	148.731	105.671	125.849			0.913	0.4128	1.0333	0.7273			129.635	162.339	68.635	153.663	146.28			2.187	0.5223	1.615	0.7935	0.959			113.639	122.843
	254.741	118.003	52.1265	107.977			1.2275	0.4908	1.0243	0.7298			105.876	110.194	133.028	84.7782			1.5035	0.335	0.9475	0.5858			130.907	178.654	26.6983	166.761	73.1789			1.5408	0.6448	1.5913	2.9565	1.633			113.415	137.222
	105.83	175.649	95.1839	242.536			1.3385	0.318	1.0288	0.9393			161.837	237.847	68.4345	184.28			1.0361	0.3688	0.868	0.7408			92.0113	170.827	99.5602	162.09	116.815			2.179	0.7223	1.5475	0.8923	1.2595			132.948	137.302
	80.8459	159.968	104.544	163.262			1.7075	0.2785	0.7735	0.822			101.802	219.332	101.064	156.359			1.9126	0.3805	0.7978	1.154			53.1132	188.828	59.3158	172.622	166.904			2.0563	0.7818	0.8608	1.398	0.9533			130.014	135.301
	130.005	243.186	58.3914	261.076			1.3215	0.379	1.0878	0.4568			87.1745	144.145	54.0009	118.289			1.1545	0.3152	0.9398	1.209			75.9127	160.662	54.4786	152.868	91.0783			2.3675	0.8395	0.9335	1.5475	1.0763			135.395	130.995
	83.2939	183.674	87.5779	251.021			1.4605	0.319	1.1998	0.9378			43.256	146.358	160.194	98.5877			1.772	0.476	1.571	1.6165			133.668	181.413	79.3023	141.883	81.1073			2.0048	0.6213	1.5558	1.1103	1.8748			120.651	110.994
	97.0264	87.4761	87.0763	190.037			0.6883	0.3132	1.1848	0.3898			95.5794	210.139	126.223	82.6081			2.1069	0.5427	0.4048	0.9423			65.5061	145.127	37.1111	55.1472	177.697			1.6123	0.6318	1.716	0.99	0.6883			90.0814	117.495
	78.0259	182.863	72.7997	213.465			1.142	0.402	1.3918	0.3475			93.7614	234.589	160.331	223.655			1.5709	0.6345	0.657	0.772			97.7257	154.956	73.077	82.9976	97.3679			1.8865	0.4628	1.289	1.292	0.733			87.6239	125.423
	80.746	79.5518	72.9907	332.75			1.6633	0.3232	1.1023	1.011			76.8934	207.287	113.292	114.223			1.5764	0.4645	0.4485	0.8015			109.468	195.346	50.3546	85.3126	95.0612			1.6408	0.574	1.4083	0.673	1.113			108.698	131.937
	99.3473	167.455	56.4144	134.795			1.5085	0.35	1.1287	0.6082			63.43	200.391	120.524	79.9767			0.9604	0.5525	0.625	0.8303			102.863	126.01	20.6456	111.175	115.727			2.7708	0.475	1.165	1.5793	0.8493			102.22	100.687
	119.309	127.208	62.2412	228.028			1.3168	0.3177	1.0258	0.7635			127.705	164.474	116.391	181.216			1.3683	0.9023	0.8448	0.9365			134.562	170.806	12.0032	87.6851	105.782			1.4775	0.4225	1.648	1.1075	1.3235			123.203	150.728
	41.7233	152.174	52.2782	150.659			2.1388	0.3145	0.8108	0.3635			128.75	156.519	182.536	130.157			0.9154	0.507	0.5503	0.7965			115.362	177.53	65.7899	169.043	82.4523			1.542	0.3728	1.0978	0.7218	0.9665			124.99	116.796
	45.4272	186.103	35.449	186.557			1.0063	0.409	1.32	0.9845			154.46	153.589	232.442	158.987			0.9667	0.4993	0.5945	0.9668			88.1775	140.889	94.5171	142.174	91.3222			1.766	0.438	1.3108	0.9323	0.7013			107.712	126.886
	91.6681	176.427	122.746	168.439			1.1275	0.4178	0.8603	1.638			101.911	291.906	94.0764	156.892			1.2334	0.5153	1.5253	1.0455			71.6442	155.612	64.9839	151.859	150.283			1.7728	0.5345	1.905	1.0073	2.2487			106.694	124.291
	100.555	193.86	144.487	123.526			1.4078	0.3373	1.8815	0.9815			86.4112	197.692	106.541	143.205			0.618	0.6045	1.6463	0.9198			123.234	203.085	89.3088	106.049	127.163			1.702	0.6385	2.4322	0.8113	0.788			112.482	86.191
	93.7134	240.259	53.8342	44.0992			1.239	0.3343	1.6073	0.6288			85.7766	159.874	140.484	118.136			1.6768	0.571	1.1023	1.0308			122.124	128.06	124.432	165.446	100.307			1.996	0.4318	2.6943	0.5225	1.9648			107.065	74.2294
	139.005	290.893	86.5933	180.852			1.0283	0.3493	0.988	0.9178			103.099	172.307	174.813	212.074			1.3638	0.6578	0.9195	0.8845			123.25	125.807	64.2724	126.546	103.818			1.84	0.5193	1.0608	1.0518	1.111			84.5184	69.6873
	55.8384	216.74	59.0364	239.013			1.547	0.358	1.2245	0.799			88.232	202.238	157.847	172.583			1.351	0.823	1.2828	0.8128			106.242	176.924	64.3267	135.01	106.213			2.8698	0.3288	1.5768	1.6298	1.562			104.646	70.1568
	162.891	169.276	74.3537	131.601			0.7348	0.6355	1.1495	0.5955			107.014	105.921	101.776	155.662			1.105	0.4733	0.616	1.053			88.9718	169.054	46.5163	113.422	56.3342			1.8043	0.4678	2.6925	2.0823	1.0688			90.8939	106.198
	75.2499	233.654	100.848	129.336			0.7982	0.7423	0.6475	0.6012			104.711	134.775	200.511	172.941			1.4943	0.5163	0.9185	1.781			110.206	135.297	48.3351	66.5072	172.486			2.4365	0.6223	2.4598	3.2283	2.0008			56.0362	110.622
	94.6018	145.143	125.312	127.244			1.0732	0.5317	0.3232	0.7888			82.6746	206.125	85.577	163.424			0.968	0.5317	1.043	1.0633			111.411	150.875	62.5375	159.073	51.889			1.643	0.6473	2.9665	1.6805	1.0178			78.7526	114.725
	116.257	223.566	115.077	162.505			1.1144	0.2718	0.7365	0.7153			83.3863	211.486	103.018	159.777			1.2842	0.544	1.18	0.9268			72.1078	166.133	131.458	167.57	108.81			2.265	0.5093	1.7113	3.035	1.3868			84.9241	105.013
	95.9373	164.894	217.687	95.0926			1.2469	0.3853	1.4258	0.754			189.831	148.943	143.696	113.186			1.4215	0.5578	1.3258	1.1247			70.8098	168.75	62.7377	139.955	105.745			2.6288	0.3965	2.062	1.5163	1.3625			81.1745	82.7826
	75.5262	172.077	68.6862	97.9331			1.2969	0.4235	0.284	1.1285			102.619	156.722	81.6569	97.9792			1.313	0.4765	0.6223	0.9695			128.774	172.449	74.6283	184.381	103.418			0.4696	0.5343	1.459	1.6928	1.484			91.764	126.55
	113.439	191.418	97.428	310.284			0.9319	0.262	0.886	0.9805			119.324	171.984	98.5017	81.1202			1.4715	0.3965	1.2735	1.1828			86.2675	144.829	104.352	144.871	157.989			0.6575	0.4805	2.214	1.507	1.311			105.522	60.5594
	89.3329	161.664	46.9829	242.904			1.3017	0.3965	0.3278	0.5685			66.3048	240.713	126.564	108.703			1.87	0.5093	0.9885	0.957			88.1563	155.338	83.1856	126.594	97.172			0.4503	0.4378	1.144	1.8085	1.0238			83.7673	71.0169
	74.083	171.67	89.4832	96.3909			1.3184	0.4853	0.416	0.3315			140.149	176.626	78.7896	112.131			1.6953	0.393	1.126	0.8893			108.508	153.547	62.1408	107.678	72.1394			1.9005	0.35	1.252	1.3985	1.085			116.611	109.13
	121.903	203.247	109.251	87.3218			1.9205	0.3668	0.8105	0.3605			77.4445	172.577	131.204	159.028			1.0405	0.4728	1.1692	0.6555			65.6777	153.884	179.693	128.301	64.706			1.9635	0.4598	1.284	1.453	1.4943			92.5565	80.588
	119.096	110.638	158.096	147.198			1.1953	0.415	0.531	0.8758			110.432	176.638	174.37	134.158			1.2108	0.43	1.0448	1.1415			107.907	156.703	82.554	105.692	68.0428			1.8038	0.6323	0.981	1.7038	1.06			104.61	117.845
	80.8714	174.338	137.176	280.346			1.5396	0.5585	1.0725	0.4093			68.7516	128.542	145.967	105.884			1.0718	0.416	1.0005	1.3135			170.374	173.584	92.0341	110.923	122.271			0.5643	0.7725	0.913	2.2338	2.2105			106.869	99.3251
	158.425	204.914	113.399	184.393			1.1757	0.4638	0.4345	0.727			82.9538	142.356	91.546	138.054			1.462	0.4465	0.97	0.8855			65.3873	182.362	76.685	85.9226	107.848			0.5534	0.3895	0.664	1.49	0.853			110.81	78.4822
	61.4221	163.588	75.997	190.789			1.5834	0.339	0.6318	0.691			83.5794	155.536	89.2842	102.849			0.9573	0.3745	2.0025	0.8005			77.7097	133.67	117.251	91.3812	24.4412			1.1946	0.6818	0.801	2.6568	0.4633			130.689	69.5083
	47.1146	222.607	105.79	146.133			2.0267	0.4235	0.672	0.6395			115.565	220.369	51.8402	126.876			1.3958	0.5575	1.496	0.8745			101.238	179.657	64.7707	55.7472	44.8417			1.1261	0.3595	0.6	1.4303	2.7555			91.9324	83.6365
	146.233	89.5712	53.0081	127.227			0.695	0.4083	0.673	0.433			65.2598	166.556	153.974	149.092			0.9098	0.3945	0.5538	1.109			145.499	153.23	24.9096	79.5671	188.262			0.434	0.7128	0.822	1.0468	0.551			85.0918	72.5912
	91.0604	134.218	93.0997	69.5258			1.672	0.3965	0.4275	0.543			84.327	145.133	157.112	40.4265			0.9785	0.539	1.1388	0.8633			63.7114	164.924	72.6801	26.2296	141.017			1.0511	0.535	1.131	0.9775	0.72			100.782	114.563
	96.215	218.674	44.58	108.644			1.698	0.5558	0.7833	0.3935			88.4859	154.977	140.013	119.46			0.9175	0.591	1.2882	0.7553			103.634	185.356	93.4763	119.671	185.288			0.7342	0.385	0.944	1.4735	0.8503			99.8904	118.244
	85.1704	160.212	122.197	228.318			1.1098	0.376	1.0578	1.004			106.454	136.808	110.957	88.2835			1.1438	0.5992	1.4035	1.1007			124.154	185.543	38.2659	96.4762	138.58			0.5507	0.529	0.646	1.7135	1.335			93.4047	115.225
	119.298	161.652	50.5824	106.099			1.09	0.5075	0.4473	0.8428			102.669	175.462	190.037	103.429			0.6215	0.5635	1.1023	0.3453			120.259	199.034	50.5683	147.001	101.189			0.8287	0.7468	1.008	1.1158	1.472			94.7124	116.834
	100.567	208.514	121.635	129.825			1.0833	0.3638	0.6805	1.1063			158.46	273.08	142.923	102.092			1.0103	0.4588	1.0123	0.8613			174.787	151.84	78.1454	69.4891	92.3172			1.6087	0.3775	1.893	1.0785	1.111			104.372	92.683
	117.374	171.409	119.378	133.751			0.8783	0.263	0.9448	0.5875			90.0056	174.286	210.826	81.6577			1.1852	0.618	1.448	0.8138			54.6834	182.893	65.5618	89.731	134.406			1.1509	0.4455	1.898	1.7273	1.0738			84.2224	106.484
	80.9836	119.325	41.4728	139.04			0.7563	0.4453	0.4208	0.7888			101.626	140.01	210.033	209.508			1.1972	0.3823	1.793	1.0315			53.6252	130.752	79.8172	77.8389	86.7978			1.5344	0.4405	1.989	1.7253	2.4508			74.2381	113.242
	92.4842	200.682	70.7261	74.7682			0.8825	0.3528	0.6538	0.7065			108.272	131.063	122.89	117.073			1.2133	0.439	2.2083	1.645			115.756	124.605	82.4929	148.036	109.035			1.6013	0.838	1.322	1.527	0.8763			70.9875	98.8682
	94.5023	187.612	63.4524	55.0014			1.1005	0.3743	0.6688	0.657			107.166	225.77	97.897	83.5204			1.4208	0.5025	0.9918	1.1253			109.116	148.83	103.996	152.067	100.804			1.6968	0.3855	0.981	1.4755	0.7813			121.866	118.055
	78.726	110.921	135.093	102.061			1.2975	0.4585	0.458	1.0215			49.4828	263.972	130.396	103.609			0.6092	0.5103	1.2803	1.3095			100.054	142.351	88.271	64.4072	108.734			2.056	0.5982	1.131	1.615	2.802			92.0063	86.6737
	109.922	153.204	155.387	220.231			1.5798	0.3735	0.3623	1.036			50.7644	137.686	84.1713	100.269			1.252	0.472	0.7185	1.1545			101.845	169.792	84.3985	44.9118	101.602			1.5308	0.447	0.814	1.5913	1.8888			93.2107	98.4788
	99.7402	130.681	85.2501	149.966			1.4008	0.3785	0.9873	0.7005			102.343	140.287	146.051	167.228			1.1478	0.43	1.1483	1.1283			71.1454	174.8	43.1217	61.1377	138.976			3.749	0.599	0.791	1.5475	0.6985			100.629	99.0741
	132.404	215.658	102.011	118.84			1.1187	0.3643	0.8608	0.5613			102.69	176.046	89.3077	157.885			1.0163	0.4448	1.2283	1.4128			105.361	143.626	106.857	59.6196	90.2092			2.739	0.6628	0.707	0.8608	0.71			132.125	93.078
	88.3905	188.922	193.618	119.884			0.848	0.2655	0.7723	0.7993			153.974	253.977	120.398	174.61			1.1463	0.3743	1.2155	0.8065			80.2954	152.296	86.8304	67.5236	127.689			1.6013	0.5763	0.6	0.9335	2.2828			129.93	89.8843
																																							123.891	120.691
Statistics	p-value					Statistics	p-value					Statistics	p-value					Statistics	p-value					Statistics	p-value						Statistics	p-value							132.503	115.471
Kruskal-Wallis test	< 0.0001					Kruskal-Wallis test	< 0.0001					Kruskal-Wallis test	< 0.0001					Kruskal-Wallis test	< 0.0001					Kruskal-Wallis test	< 0.0001						Kruskal-Wallis test	< 0.0001							80.3927	73.559
Dunn's						Dunn's						Dunn's						Dunn's						Dunn's							Dunn's								91.2407	76.439
B16-F1 vs EVM-KO	***					B16-F1 vs EVM-KO	***					B16-F1 vs EVM-KO	***					B16-F1 vs EVM-KO	***					B16-F1 vs EVM-KO	***						B16-F1 vs EVM-KO	***							73.9521	92.7255
B16-F1 vs Evl rescue	n.s.					B16-F1 vs Evl rescue	***					B16-F1 vs Evl rescue	**					B16-F1 vs Evl rescue	n.s.					B16-F1 vs VASP rescue	*						B16-F1 vs VASP rescue	n.s.							63.2186	95.1305
B16-F1 vs Mena rescue	***					B16-F1 vs Mena rescue	***					B16-F1 vs Mena rescue	**					B16-F1 vs Mena rescue	*					B16-F1 vs Evl rescue	n.s.						B16-F1 vs Evl rescue	n.s.							71.1797	98.4838
EVM-KO vs Evl rescue	***					EVM-KO vs Evl rescue	***					EVM-KO vs Evl rescue	***					EVM-KO vs Evl rescue	***					B16-F1 vs Mena rescue	n.s.						B16-F1 vs Mena rescue	n.s.							63.6918	92.7431
EVM-KO vs Mena rescue	n.s.					EVM-KO vs Mena rescue	***					EVM-KO vs Mena rescue	***					EVM-KO vs Mena rescue	***					EVM-KO vs VASP rescue	***						EVM-KO vs VASP rescue	***							58.4812	124.69
Evl rescue vs Mena rescue	***					Evl rescue vs Mena rescue	n.s.					Evl rescue vs Mena rescue	n.s.					Evl rescue vs Mena rescue	n.s.					EVM-KO vs Evl rescue	***						EVM-KO vs Evl rescue	***							66.0404	125.924
																								EVM-KO vs Mena rescue	***						EVM-KO vs Mena rescue	***							89.4529	111.192
*	< 0.05					*	< 0.05					*	< 0.05					*	< 0.05					VASP rescue vs Evl rescue	***						VASP rescue vs Evl rescue	n.s.							99.9495	100.778
**	< 0.01					**	< 0.01					**	< 0.01					**	< 0.01					VASP rescue vs Mena rescue	***						VASP rescue vs Mena rescue	n.s.							117.171	96.7209
***	< 0.001					***	< 0.001					***	< 0.001					***	< 0.001					Evl rescue vs Mena rescue	n.s.						Evl rescue vs Mena rescue	n.s.							89.6926	89.4609
n.s.	> 0.05					n.s.	> 0.05					n.s.	> 0.05					n.s.	> 0.05																				127.556	86.0885
																								*	< 0.05						*	< 0.05							117.817	90.1106
																								**	< 0.01						**	< 0.01							105.228	102.186
																								***	< 0.001						***	< 0.001							93.8172	92.5963
																								n.s.	> 0.05						n.s.	> 0.05							135.347	82.3779
																																							140.37	61.0772
																																							121.595	80.952
																																							149.191	94.5268
																																							84.3018	117.431
																																							103.626	138.026
																																							101.192	116.591
																																							90.3795	97.34
																																							108.055	162.005
																																							73.8398	121.767
																																							96.3268	122.322
																																							89.9881	160.704
																																							98.0257	123.936
																																							92.9291	78.2706
																																							103.423	83.8478
																																							86.1657	91.221
																																							76.9779	106.722
																																							98.5063	81.5392
																																							93.8451	98.9403
																																							72.7614	95.2684
																																							101.441	101.162
																																							94.142	105.26
																																							78.9137	101.441
																																							76.6344	114.352
																																							87.3307	102.623
																																							72.1503	119.285
																																							81.7229	119.325
																																							80.1852	118.99
																																							119.368	127.722
																																							113.297	151.65
																																							107.4	116.568
																																							126.995	91.8387
																																							146.766	91.5445
																																							111.819	107.135
																																							127.058	71.7628
																																							107.823	103.021
																																							122.066	72.4898
																																							105.76	44.8942
																																							112.184	52.5457
																																							129.687	81.8787
																																							93.8531	99.18
																																							93.7013	90.6778
																																							95.4042	73.2313
																																							98.505	94.8051
																																							96.0193	101.848
																																							75.1752	114.984
																																							83.8132	116.11
																																							93.696	111.731
																																							90.1106	73.0649
																																							75.8435	71.6244
																																							56.7821	53.3645
																																							86.8248	67.5463
																																						Statistics	p-value
																																						Mann-Whitney rank sum test	n.s.
																																						B16-F1 vs EVM-KO	0.519
