# Supplementary material for: Loss of Ena/VASP interferes with lamellipodium architecture, motility and integrin-dependent adhesion
Source: eLife. 2020 May 11;9:e55351. doi: 10.7554/eLife.55351 (PMC7239657; doi:10.7554/eLife.55351)
Supplement: Figure 5—source data 1. [file elife-55351-fig5-data1.xlsx]

## Sheet: Sheet1
Source Data Figure 5	Figure 5. Loss of Ena/VASP affects lamellipodial parameters and protrusion dynamics
Figure 5 B					Figure 5 C					Figure 5 E					Figure 5 E					Figure 5 I					Figure 5 J				Figure 5 J
p16 intensity in lamellipodium in %					p16 signal width in µm					CP intensity in lamellipodium in %					CP signal width in µm					Protrusion rate in µm/min					Protrusion persistance in min				Actin polymerization rate in µm/min
Statistics see below dataset					Statistics see below dataset					Statistics see below dataset					Statistics see below dataset					Statistics see below dataset					Statistics see below dataset				Statistics see below dataset
Cell line	B16-F1	EVM-KO	VASP rescue		Cell line	B16-F1	EVM-KO	VASP rescue		Cell line	B16-F1	EVM-KO	VASP rescue		Cell line	B16-F1	EVM-KO	VASP rescue		Cell line	B16-F1	EVM-KO	VASP rescue		Cell line	B16-F1	EVM-KO		Cell line	B16-F1	EVM-KO
Mean	100	176.437	86.8276		Mean	1.2042	0.439751	1.35367		Mean	100	176.946	134.4		Mean	1.23584	0.500498	1.0243		Mean	3.26479	2.31484	3.45599		Mean	21.96	18.75		Mean	4.22466	3.2102
Median	106.019	168.011	77.365		Median	1.14	0.437	1.231		Median	101.714	165.213	127.127		Median	1.204	0.501	0.941		Median	3.128	2.147	3.105		Median	20.5	17.75		Median	4.229	3.117
SD	27.4475	49.1698	35.7872		SD	0.313451	0.095636	0.458048		SD	29.6355	42.4641	34.1132		SD	0.328447	0.109842	0.399453		SD	0.691757	0.74582	1.38057		SD	7.98132	6.14364		SD	0.784148	0.702397
SEM	3.701	6.63	4.826		SEM	0.0423	0.0129	0.0618		SEM	4.191	6.005	4.824		SEM	0.0464	0.0155	0.0565		SEM	0.138	0.152	0.356		SEM	1.596	1.281		SEM	0.12	0.115
25 % Percentil	78.508	144.92	58.471		25 % Percentil	0.964	0.374	1.008		25 % Percentil	83.386	146.126	109.79		25 % Percentil	0.979	0.43	0.734		25 % Percentil	2.915	1.661	2.548		25 % Percentil	17.188	14.5		25 % Percentil	3.707	2.751
75 % Percentil	117.89	212.465	109.78		75 % Percentil	1.462	0.495	1.627		75 % Percentil	108.272	216.118	161.886		75 % Percentil	1.422	0.552	1.249		75 % Percentil	3.81	2.894	3.905		75 % Percentil	26.125	21.688		75 % Percentil	4.742	3.517
C.I. of mean	7.42	13.292	9.675		C.I. of mean	0.0847	0.0259	0.124		C.I. of mean	8.422	12.068	9.695		C.I. of mean	0.0933	0.0312	0.114		C.I. of mean	0.286	0.315	0.765		C.I. of mean	3.295	2.657		C.I. of mean	0.241	0.234
n	55	55	55		n	55	55	55		n	50	50	50		n	50	50	50		n	25	24	15		n	25	23		n	43	37
	114.316	87.5065	77.3654			1.1398	0.4973	1.289			86.9284	158.978	100.918			1.3968	0.539	0.5635			2.4026	3.2411	3.1084			17	28.75			3.9385	4.8
	93.4541	236.289	70.0422			1.8165	0.4475	1.3403			79.6016	251.167	120.662			0.8652	0.5083	0.8088			2.5316	1.4513	2.8564			20	8.5			4.8333	3.4545
	150.169	303.414	44.9717			1.1612	0.3468	0.984			127.515	105.921	115.83			0.913	0.4128	1.0585			3.3056	2.2253	3.942			10.75	14.5			3.296	2.6833
	134.343	161.652	69.8419			1.536	0.4308	1.1458			105.876	291.906	118.342			1.5035	0.335	1.46			3.8216	1.6286	6.4724			28	16.75			4.8267	4.4267
	119.766	102.13	83.5346			1.5983	0.3838	1.7178			161.837	237.847	106.588			1.0361	0.3688	0.6598			3.354	3.4024	3.7936			29.25	17.5			3.6848	3.2
	135.271	177.839	78.6015			1.0758	0.5703	0.9773			101.802	164.474	155.049			1.9126	0.3805	0.819			2.9831	2.0318	6.474			11.5	14.5			2.8833	2.8308
	106.019	180.195	52.5014			1.0355	0.4333	1.0425			87.1745	154.378	117.77			1.1545	0.3152	0.7415			3.8378	1.7093	3.3408			8.25	17.75			4.2581	3.12
	109.922	168.011	50.4193			1.729	0.3903	0.9695			43.256	190.497	165.787			1.772	0.476	0.7345			3.6281	1.9563	4.1672			19.5	22.25			5.0545	2.9538
	114.942	137.648	67.0229			1.4863	0.4455	1.2715			95.5794	134.775	163.916			2.1069	0.5427	0.676			2.9509	3.6765	2.8228			17.25	15			4.7448	2.8
	111.458	248.701	93.7507			1.274	0.435	1.6638			93.7614	220.369	109.977			1.5709	0.6345	0.8205			3.1766	3.612	2.3036			24.75	14.5			5.1714	3.4889
	76.9487	89.5712	40.7893			0.955	0.457	1.0615			76.8934	143.509	169.204			1.5764	0.4645	1.0103			3.8055	2.3005	2.472			30	28			4.1053	3.1875
	84.5158	278.718	58.3229			1.2595	0.4363	2.2073			63.43	173.144	189.178			0.9604	0.5525	0.6092			3.0638	2.3381	2.4928			20.75	26.75			4.7	2.95
	85.2386	154.13	58.9158			0.7958	0.4623	2.102			127.705	118.053	189.212			1.3683	0.9023	0.6868			4.3538	1.5964	3.1052			15	14.25			2.8889	5.1467
	120.271	228.134	76.6682			0.7675	0.4988	1.133			128.75	144.145	102.928			0.9154	0.507	2.17			4.1925	2.0801	2.7148			17.5	12			3.8154	3
	66.1122	139.516	50.9641			0.6765	0.5083	1.5395			154.46	172.307	146.994			0.9667	0.4993	1.0203			3.0746	2.8864	1.7738			16.75	19			3.425	4.2857
	71.4751	182.863	68.7529			1.09	0.3593	0.9258			101.911	146.126	112.498			1.2334	0.5153	0.7235			2.9993	1.6287				25	20			2.8125	2.3619
	89.4579	243.186	53.7799			0.981	0.436	1.0155			86.4112	171.956	148.209			0.618	0.6045	1.1218			2.322	1.2094				25.5	9			3.2348	2.6545
	65.7871	174.338	51.8338			0.81	0.5367	1.0073			85.7766	156.519	146.987			1.6768	0.571	0.9885			3.5153	3.4616				19.25	19.5			3.6903	4
	70.4095	219.059	84.7096			1.1135	0.4835	1.8385			103.099	102.07	160.485			1.3638	0.6578	0.734			2.8058	1.9565				20.5	16.5			4.7333	3.1167
	80.1219	171.409	68.2854			0.8053	0.4543	0.6828			88.232	231.027	143.065			1.351	0.823	0.949			2.967	2.7252				21.5	19			3.7565	2.2222
	96.6997	155.425	68.2819			1.4243	0.4865	1.2678			107.014	216.118	108.623			1.105	0.4733	0.4233			4.4828	1.6931				17.75	19.25			4.52	1.8714
	113.713	118.003	47.2467			1.6068	0.6453	1.1775			104.711	206.125	165.448			1.4943	0.5163	0.5018			2.0801	2.2145				36	31.25			4.7714	3.52
	116.585	215.658	119.925			1.2405	0.4535	1.7323			82.6746	163.737	161.532			0.968	0.5317	0.8795			2.2898	1.6286				21.75	26.75			4.875	2.272
	110.951	161.799	101.694			1.3375	0.5273	1.646			83.3863	233.399	119.171			1.2842	0.544	0.7228			3.1283	2.9025				33				5.536	2.5882
	66.9179	161.664	69.5072			1.1147	0.4468	1.7525			189.831	176.626	140.921			1.4215	0.5578	0.5978			4.5473					42.5				4.3273	2.7636
	117.42	152.174	103.803			1.0635	0.399	1.2303			102.619	263.972	163.27			1.313	0.4765	0.415												4.3429	3.44
	107.174	262.495	165.549			0.9638	0.3865	0.8148			119.324	163.701	108.359			1.4715	0.3965	0.7313		Statistict	p-value				Statistics	p-value				4.2581	3.0286
	123.012	207.869	122.276			1.0978	0.4835	1.0105			66.3048	136.808	178.803			1.87	0.5093	0.7773		Kruskal-Wallis test	0.0002				Mann-Whitney rank sum test	n.s.				4.4	3.3412
	85.9394	218.674	76.9457			0.9185	0.5	1.4895			140.149	155.536	161.887			1.6953	0.393	1.3788		Dunn's					B16-F1 vs EVM-KO	0.112				4	2.4667
	77.9699	203.247	64.265			1.325	0.5317	0.8498			77.4445	141.724	121.248			1.0405	0.4728	1.1715		B16-F1 vs EVM-KO	***									5.6	3.008
	84.8337	142.502	47.3182			1.4745	0.4973	0.8485			110.432	216.815	108.114			1.2108	0.43	1.416		B16-F1 vs VASP rescue	n.s.									4.303	3.3333
	94.7051	202.475	134.363			0.8805	0.4275	0.7608			68.7516	137.686	110.839			1.0718	0.416	1.1115		EVM-KO vs VASP rescue	*									6.6286	3.5667
	70.2645	164.665	188.305			0.7213	0.4588	1.6398			82.9538	165.567	86.7648			1.462	0.4465	0.8378												4.6667	3.0444
	114.286	213.997	154.396			0.8778	0.633	1.2313			83.5794	227.016	78.378			0.9573	0.3745	0.85		*	< 0.05									4	3.72
	119.528	200.682	111.412			2.022	0.4373	1.1752			115.565	166.556	61.3936			1.3958	0.5575	1.2493		**	< 0.01									3.3517	3.5158
	59.228	140.39	118.538			1.6348	0.3835	0.9173			65.2598	197.692	88.0428			0.9098	0.3945	0.9245		***	< 0.001									5.1667	3.9
	35.9571	87.4761	111.181			1.1998	0.298	1.553			84.327	239.758	109.79			0.9785	0.539	0.912		n.s.	> 0.05									3.8571	2.7143
	70.7712	134.218	66.5102			1.1688	0.3708	1.1278			88.4859	156.722	179.984			0.9175	0.591	1.4703												3.6
	38.0362	164.261	31.561			0.8628	0.3103	0.981			106.454	153.589	159.212			1.1438	0.5992	0.933												4.0741
	111.746	156.576	49.5383			1.5375	0.306	1.8998			102.669	176.638	204.34			0.6215	0.5635	1.163												4.0571
	72.8996	130.681	98.6106			1.1623	0.3045	1.7113			158.46	159.874	152			1.0103	0.4588	1.0398												3.8667
	118.046	92.5951	93.0914			1.1983	0.269	1.3835			90.0056	175.462	106.219			1.1852	0.618	1.5478												3.376
	95.4129	204.914	72.9187			0.9885	0.3683	2.214			101.626	171.984	187.309			1.1972	0.3823	2.3948												4.2286
	116.769	159.968	42.3249			1.5693	0.3535	1.446			108.272	218.258	138.169			1.2133	0.439	1.528
	54.1996	216.74	50.5228			1.0203	0.3993	1.5885			107.166	148.943	182.017			1.4208	0.5025	1.1852											Statistics	p-value
	95.3147	131.796	95.9049			1.0485	0.3265	1.5818			49.4828	164.859	121.103			0.6092	0.5103	1.4593											Mann-Whitney rank sum test	***
	95.2025	186.103	149.218			1.5533	0.4598	2.7173			50.7644	239.502	126.936			1.252	0.472	1.3403											B16-F1 vs EVM-KO	< 0.001
	126.241	233.654	141.375			1.8225	0.663	1.2968			102.343	138.302	115.831			1.1478	0.43	1.3523
	110.892	163.588	88.8842			1.3943	0.386	1.3218			102.69	125.139	127.318			1.0163	0.4448	1.3238
	123.418	153.204	154.292			0.9428	0.2398	1.0835			153.974	140.01	63.3802			1.1463	0.3743	1.2215
	102.434	110.921	105.575			1.5925	0.3408	0.917
	152.474	156.064	115.528			0.9538	0.352	0.9333		Statistict	p-value				Statistict	p-value
	120.114	193.86	124.224			1.3323	0.6628	1.2178		Kruskal-Wallis test	< 0.0001				Kruskal-Wallis test	< 0.0001
	152.703	169.276	86.3288			1.108	0.5843	2.7908		Dunn's					Dunn's
	148.143	252.124	103.03			0.9658	0.481	1.2283		B16-F1 vs EVM-KO	***				B16-F1 vs EVM-KO	***
										B16-F1 vs VASP rescue	***				B16-F1 vs VASP rescue	n.s.
Statistict	p-value				Statistict	p-value				EVM-KO vs VASP rescue	***				EVM-KO vs VASP rescue	***
Kruskal-Wallis test	< 0.0001				Kruskal-Wallis test	< 0.0001
Dunn's					Dunn's					*	< 0.05				*	< 0.05
B16-F1 vs EVM-KO	***				B16-F1 vs EVM-KO	***				**	< 0.01				**	< 0.01
B16-F1 vs VASP rescue	n.s.				B16-F1 vs VASP rescue	n.s.				***	< 0.001				***	< 0.001
EVM-KO vs VASP rescue	***				EVM-KO vs VASP rescue	***				n.s.	> 0.05				n.s.	> 0.05
*	< 0.05				*	< 0.05
**	< 0.01				**	< 0.01
***	< 0.001				***	< 0.001
n.s.	> 0.05				n.s.	> 0.05
