# Supplementary material for: Loss of Ena/VASP interferes with lamellipodium architecture, motility and integrin-dependent adhesion
Source: eLife. 2020 May 11;9:e55351. doi: 10.7554/eLife.55351 (PMC7239657; doi:10.7554/eLife.55351)
Supplement: Figure 6—source data 1. [file elife-55351-fig6-data1.xlsx]

## Sheet: Sheet1
Source Data Figure 6	Figure 6. Electron tomography of ultrastructural changes in lamellipodial actin networks
Figure 6 B				Figure 6 B														Figure 6 D
Filament length in nm				Filament density in nm^-1, barbed and pointed end density in µm^-1														Filament angle to cell edge frequency in %
Cell line	B16-F1	EVM-KO		Cell line	B16-F1		EVM-KO		B16-F1		EVM-KO		B16-F1		EVM-KO			Cell line	B16-F1	SEM	EVM-KO	SEM
Mean	206.807	137.334		Distance (µm)/Density	Filament	SEM	Filament	SEM	Barbed end	SEM	Barbed end	SEM	Pointed end	SEM	Pointed end	SEM		Filament angle
Median	103.178	82.985		0	0	0	0.00018917	0.00018917	0.00027317	0.00017498	0.00013783	0.00013783	0	0	0	0		10	0.0457	0.0148	0.0968	0.008942
SD	233.817	133.511		100	0.1044	0.017	0.1261	0.0152	0.0015593	0.00012246	0.0018198	0.00034106	0.0003445	6.6015e-05	0.00066	0.0001095		30	0.0848	0.0112	0.0978	0.0069138
SEM	2.088	1.115		200	0.2243	0.0136	0.2168	0.0073086	0.001595	0.00013153	0.0018272	0.00010508	0.0011178	9.1433e-05	0.0017625	7.4873e-05		50	0.1364	0.0135	0.1168	0.01
25 % Percentil	56.043	56.72		300	0.2412	0.0136	0.2242	0.0148	0.0011948	0.00017011	0.0017102	0.0001835	0.0013447	0.00015542	0.0018572	0.0001557		70	0.1552	0.0123	0.1307	0.0128
75 % Percentil	263.073	161.657		400	0.2272	0.0145	0.196	0.0148	0.0010553	0.00012492	0.0014532	0.00015697	0.0011243	0.00011809	0.001651	0.00017219		90	0.1553	0.0115	0.1293	0.0049426
C.I. of mean	4.094	2.185		500	0.2205	0.0071967	0.1752	0.0176	0.00095367	0.00012764	0.001227	0.00022102	0.0010152	0.00011454	0.0013987	0.00020553		110	0.141	0.012	0.1348	0.012
n	12535	14348		600	0.2142	0.0090964	0.1615	0.0158	0.000867	8.8222e-05	0.001085	0.00021359	0.00091933	9.2626e-05	0.001219	0.00020819		130	0.148	0.0162	0.1118	0.0118
				700	0.2099	0.0089805	0.1399	0.0145	0.000814	6.1203e-05	0.00091867	0.00015887	0.00094783	7.1293e-05	0.0009945	0.00015441		150	0.0782	0.0113	0.0928	0.0083956
Statistics	p-value			800	0.1949	0.0094597	0.1343	0.0212	0.00070817	6.7789e-05	0.00091867	0.00020659	0.00076267	6.8135e-05	0.0010083	0.00017184		170	0.0555	0.0199	0.0893	0.0114
Mann-Whitney rank sum test	***			900	0.1896	0.0111	0.1356	0.0269	0.00065633	5.5221e-05	0.0010392	0.00030717	0.0007055	7.382e-05	0.0010995	0.00029582
B16-F1 vs EVM-KO	< 0.001			1000	0.1808	0.0134	0.1384	0.0259	0.00064217	7.5414e-05	0.001101	0.00033613	0.0007365	7.1e-05	0.0010778	0.00034368
				1100	0.1712	0.0125	0.1224	0.0201	0.00061883	5.6391e-05	0.0008996	0.00030809	0.00068283	6.7556e-05	0.0009658	0.00030862
	B16-F1	EVM-KO		1200	0.1672	0.0151	0.115	0.0234	0.000638	5.7848e-05	0.0006965	0.00031346	0.00075583	6.5868e-05	0.0007325	0.00030571
	62.5695	50.826		1300	0.1501	0.0115	0.0918	0.0224	0.0005705	5.296e-05	0.0005355	0.00020465	0.0006805	6.1818e-05	0.00059	0.00018245
	139.16	60.1496		1400	0.135	0.0066961	0.103	0.0193	0.0006115	0.00011022	0.00058333	0.0001512	0.00066725	7.2323e-05	0.000545	0.00016948
	645.201	98.4488		1500	0.1225	0.0121	0.0809	0.0116	0.00045733	8.7754e-05	0.000354	9.7511e-05	0.000569	7.741e-05	0.000437	5.8129e-05
	276.864	80.1489		1600	0.0984	0	0.082	0	0.000402	0	0.000301	0	0.000465	0	0.000301	0
	54.9285	50.4464		1700			0.082	0			0.00029	0			0.00029	0
	266.49	70.0725
	334.895	50.6313
	353.705	50.6398
	75.6831	50.6313
	118.222	69.6491
	228.989	50.8248
	187.577	59.8972
	46.3657	213.735
	46.4888	194.438
	54.3539	50.2785
	65.8956	157.093
	177.844	99.5102
	54.9631	59.9489
	65.5384	80.5483
	242.028	79.2148
	192.507	70.9763
	72.7892	79.9462
	164.362	79.4716
	55.2241	80.1247
	948.644	58.8209
	55.061	51.0717
	81.8865	78.6719
	83.5335	59.1232
	109.74	71.6591
	357.669	80.1634
	412.653	90.3809
	184.525	785.48
	46.6324	60.3761
	206.408	194.616
	63.4215	71.802
	280.767	87.2356
	101.971	50.423
	56.2435	91.6279
	84.7413	229.616
	111.009	230.967
	112.134	150.854
	63.8789	89.272
	171.284	89.3682
	47.2361	100.014
	108.767	514.709
	402.445	282.45
	100.305	71.7702
	1062.15	69.6172
	55.9484	51.1341
	54.9233	79.5899
	511.156	78.094
	195.912	70.3266
	607.451	182.84
	253.515	70.6262
	55.5604	69.2212
	145.761	244.443
	399.201	72.7891
	184.089	69.4537
	418.409	60.3768
	112.955	79.2597
	46.0913	62.0136
	101.781	59.969
	196.291	214.958
	100.366	60.7094
	56.7996	158.748
	91.8066	60.6788
	278.696	50.6814
	210.21	50.2599
	259.93	59.8705
	54.7081	122.987
	165.92	80.5522
	74.7059	100.065
	83.0749	71.167
	111.705	51.6649
	65.3938	59.7444
	92.4555	69.5812
	54.7045	60.3481
	149.262	90.5393
	258.59	59.7006
	47.1656	69.0332
	91.5932	171.158
	56.0042	51.2304
	168.713	88.4541
	228.637	60.9747
	119.998	69.898
	54.1585	69.0067
	166.242	108.316
	240.533	59.4432
	167.416	50.4262
	907.31	81.1116
	146.079	51.0806
	101.914	244.919
	157.911	71.0401
	110.208	51.263
	74.0121	69.9484
	103.018	92.4956
	201.76	110.406
	55.0962	99.4369
	46.2081	101.686
	178.479	61.8867
	184.169	50.9902
	119.596	51.0889
	73.8992	269.746
	200.299	69.4468
	365.565	82.1497
	710.562	604.507
	122.396	163.625
	139.597	170.891
	66.1142	141.531
	353.635	100.373
	147.654	79.069
	47.0826	70.3985
	131.781	51.4758
	185.784	89.1438
	53.7296	685.532
	176.775	60.4326
	397.299	194.621
	72.0737	649.166
	55.9174	273.707
	63.6448	89.1108
	129.479	50.2281
	238.987	51.2097
	75.5665	241.176
	553.996	60.4472
	53.8445	495.444
	46.2781	101.288
	92.8188	100.467
	64.2038	67.9925
	292.214	59.8323
	109.509	338.215
	53.2885	81.5696
	128.498	418.146
	81.0257	79.6517
	196.671	253.957
	47.2024	180.783
	591.756	86.1095
	158.522	174.811
	149.366	70.0739
	728.748	59.8273
	223.263	185.958
	55.9828	119.032
	269.716	50.7793
	56.2306	79.0655
	230.946	60.7919
	93.1705	80.8939
	46.6326	108.978
	307.607	283.239
	156.762	103.191
	128.985	88.7223
	83.0555	68.8634
	188.503	332.882
	46.4967	98.8739
	298.405	331.152
	64.0953	52.0022
	101.206	140.796
	91.5767	60.1871
	304.09	59.0775
	157.915	60.0795
	64.9676	91.3087
	274.41	601.969
	90.7199	600.206
	54.6741	378.718
	160.728	272.185
	137.946	605.946
	54.2982	366.195
	53.7754	70.5366
	457.071	50.4618
	272.569	141.075
	110.326	61.2336
	434.961	68.0599
	122.611	141.434
	54.9683	59.443
	139.642	436.533
	149.187	328.66
	218.252	59.9447
	187.182	171.218
	56.0124	90.616
	90.4369	69.1805
	112.758	160.189
	176.33	169.51
	166.943	179.031
	62.8683	213.501
	72.5286	606.494
	65.6445	70.3413
	128.314	57.2364
	562.355	140.727
	108.18	60.0131
	463.926	51.2252
	217.703	121.305
	138.441	92.454
	269.257	60.1744
	64.0455	111.142
	55.7029	50.4194
	109.211	576.459
	158.112	59.6992
	167.189	110.626
	100.626	78.904
	162.535	79.5042
	47.001	131.286
	140.548	50.6811
	56.8319	50.6747
	80.6737	79.9043
	55.6018	50.8399
	243.64	50.2856
	82.8113	59.3673
	54.0098	71.5132
	46.5477	51.2065
	256.132	171.492
	473.213	111.127
	128.05	90.1302
	82.8758	121.314
	46.8519	170.706
	54.8653	50.0855
	112.285	112.327
	63.0699	50.5291
	362.124	279.711
	65.9225	110.024
	66.2101	109.624
	107.674	60.2605
	92.3034	51.4274
	149.334	181.7
	223.447	60.6446
	158.059	121.977
	214.009	59.8262
	55.6833	316.806
	950.284	268.246
	241.206	141.537
	145.812	170.675
	100.81	50.4866
	122.562	373.52
	63.3251	108.874
	63.7497	79.0894
	121.66	62.9285
	222.886	80.5428
	46.5001	140.428
	504.811	80.682
	56.0819	80.1086
	47.4683	102.64
	430.311	77.9438
	64.6515	504.241
	65.5718	78.9533
	73.1737	50.0418
	215.304	69.8711
	303.412	69.4855
	403.88	176.411
	53.6353	210.386
	99.4799	711.718
	74.6428	541.8
	46.2218	61.2174
	46.631	234.024
	55.05	50.099
	748.659	89.6173
	343.391	90.6169
	46.502	91.6291
	122.711	99.8755
	509.967	60.1365
	371.664	243.171
	111.598	533.853
	195.923	90.7108
	400.853	89.197
	240.614	149.583
	119.102	91.9189
	46.3967	61.4033
	110.999	536.677
	63.5793	207.87
	110.688	82.4537
	64.4771	222.938
	139.15	256.062
	119.65	60.8905
	119.979	70.3973
	398.614	60.2174
	165.608	71.2505
	46.4857	60.61
	94.445	69.9484
	620.689	50
	109.671	190.247
	191.113	99.6751
	46.9547	131.589
	295.398	60.0829
	230.664	109.006
	92.0417	175.791
	47.4387	268.066
	121.26	131.488
	632.844	79.8442
	388.11	51.0831
	73.6172	280.682
	73.4373	101.299
	54.9915	101.683
	46.0356	78.5006
	74.3418	182.988
	302.052	50.3457
	502.948	121.074
	109.72	531.333
	415.639	59.7811
	64.3419	130.747
	54.4318	160.464
	221.926	121.242
	57.0879	83.1781
	379.484	332.171
	165.381	60.1183
	65.1697	80.8794
	64.2439	207.738
	287.252	102.14
	46.4877	58.0791
	357.869	78.6733
	56.0598	71.616
	196.687	50.7775
	46.1377	50.6313
	540.379	164.849
	174.277	111.542
	107.162	187.47
	595.209	81.1653
	93.8162	50.7418
	247.323	82.6474
	449.301	79.4369
	318.843	129.028
	482.03	61.2651
	285.876	80.9659
	54.7743	69.2584
	291.889	152.418
	90.3428	451.38
	192.075	194.241
	46.2099	69.8979
	167.742	97.6279
	284.449	324.259
	55.9214	178.451
	244.435	142.647
	166.933	199.399
	55.4093	101.047
	84.6603	152.986
	46.3063	139.204
	252.452	142.027
	1046.37	138.593
	310.656	100.544
	127.998	171.049
	101.005	90.0282
	175.845	57.591
	165.236	50.3457
	53.3061	51.9022
	139.786	80.399
	155.291	58.7732
	74.347	337.295
	74.5663	98.0838
	155.044	391.402
	53.0818	50.5294
	46.3023	504.229
	173.015	50.044
	608.685	70.4235
	137.296	70.4277
	54.9991	282.467
	209.721	181.537
	249.981	112.537
	268.339	50.1486
	158.741	62.0631
	329.863	69.998
	93.3665	59.362
	241.223	59.4191
	46.7941	99.0496
	54.0627	440.546
	251.263	308.964
	469.715	309.51
	54.5791	60.68
	253.527	152.56
	441.61	60.2829
	238.637	261.883
	118.125	62.4963
	131.837	112.803
	334.259	161.256
	90.4671	50.7406
	46.6707	79.7305
	203.712	171.973
	184.498	363.731
	93.8436	127.891
	317.11	80.0983
	54.6277	59.9378
	64.4855	110.356
	55.3568	50.1827
	485.7	708.935
	81.6623	50.1855
	84.3561	130.893
	119.779	69.5172
	175.986	59.7944
	467.018	50.4464
	296.821	108.516
	222.14	161.485
	55.2436	367.327
	54.5893	58.9171
	102.842	214.153
	185.173	88.0297
	55.8351	281.593
	64.6753	171.292
	46.4257	89.0858
	55.1373	58.4894
	46.4367	291.84
	46.8495	90.198
	534.738	50.0491
	83.5626	60.5309
	46.4967	90.7994
	100.576	87.878
	110.495	69.6505
	66.3459	61.1245
	207.383	50.4761
	100.672	423.054
	111.097	60.0401
	337.373	50.7653
	56.5632	109.745
	82.6563	147.15
	55.4178	100.79
	54.0272	71.4767
	178.459	118.924
	266.455	58.4945
	55.8822	101.753
	55.6905	80.1264
	323.2	301.591
	55.4198	334.064
	55.4958	70.3373
	72.7395	70.3215
	324.667	110.36
	55.2202	70.3491
	99.7819	61.0883
	221.412	60.5322
	189.385	50.3254
	483.994	212.545
	54.8223	70.1192
	172.204	71.3989
	118.962	50.9248
	190.443	78.3079
	166.665	59.8496
	220.911	92.3534
	171.654	89.414
	54.5299	69.2417
	46.8517	111.864
	46.117	50.7807
	56.7681	89.2722
	82.1203	111.925
	318.406	141.162
	91.8002	88.1362
	84.0241	60.2956
	92.3704	128.139
	184.245	120.549
	64.3203	70.6433
	81.9387	58.477
	53.2233	60.0496
	213.871	70.5863
	82.0996	720.304
	100.113	90.0965
	382.342	62.7721
	55.0134	60.5333
	72.7582	673.882
	101.499	91.1253
	185.34	90.3622
	484.505	71.2581
	83.1326	50.8766
	55.6771	120.861
	62.8406	402.119
	140.675	51.2644
	340.599	171.343
	172.084	50.2866
	108.067	70.3739
	278.628	51.0662
	533.268	157.797
	199.874	71.0168
	183.8	284.201
	55.1339	82.1387
	171.093	92.7523
	238.548	120.484
	269.811	593.21
	499.519	382.929
	389.747	69.2274
	54.9984	60.385
	73.2741	107.337
	101.121	111.736
	167.712	253.468
	55.1492	353.454
	74.3754	191.459
	390.767	58.8661
	112.115	132.101
	127.61	233.615
	156.958	110.759
	55.0098	912.153
	613.057	63.6323
	80.4602	80.2531
	337.296	50.6144
	280.832	158.495
	130.669	566.248
	75.0492	69.4811
	474.731	445.568
	47.136	140.827
	73.6962	224.525
	47.3513	182.02
	46	68.5688
	64.3284	81.147
	74.5006	268.961
	103.309	465.127
	129.353	100.547
	75.0511	237.136
	55.7638	304.85
	63.7795	90.3372
	47.2226	131.491
	72.1423	813.544
	104.23	50.2216
	46.7588	150.915
	141.576	70.3491
	56.0106	61.4585
	65.8816	160.804
	74.0156	239.722
	54.6755	51.26
	302.13	140.341
	428.802	60.9309
	94.4723	58.6494
	233.658	782.446
	241.436	70.342
	120.721	71.4156
	204.756	162.089
	503.913	253.278
	46.4407	309.925
	186.622	113.494
	83.8012	201.363
	73.7562	101.222
	91.0813	153.699
	183.907	89.8758
	510.441	109.905
	603.504	606.839
	440.278	151.141
	290.518	147.427
	46.1793	213.299
	230.404	69.2865
	46.6299	171.144
	113.334	249.453
	75.2127	255.198
	813.463	70.8929
	54.639	690.14
	120.881	413.164
	46.819	142.251
	379.82	99.5125
	229.895	151.289
	63.9731	90.6245
	65.1562	60.1744
	54.4393	483.381
	231.137	161.783
	83.6038	60.1784
	567.703	98.068
	46.6834	89.4732
	138.49	121.207
	165.2	50.0961
	597.956	229.151
	287.566	142.907
	93.5215	90.0994
	336.533	108.922
	356.387	50.172
	73.3605	91.969
	172.719	141.083
	54.2397	100.408
	384.064	50.4259
	159.127	80.7047
	395.82	51.3065
	65.5168	89.2835
	176.522	59.5069
	46.3798	91.9844
	695.008	258.031
	842.682	92.5281
	92.0958	605.94
	46.4985	59.3921
	259.163	132.768
	530.034	119.779
	46.0918	212.674
	276.608	264.28
	46.444	59.9289
	54.9683	113.021
	46.0792	50.8909
	54.5856	400.769
	399.208	531.849
	73.4035	60.8745
	101.132	150.938
	300.365	72.8406
	56.0931	446.003
	245.029	235.988
	46.3205	58.9173
	46.7262	842.133
	128.086	339.969
	75.4128	202.347
	46.2562	50.8312
	178.292	312.697
	322.024	81.7535
	324.639	272.579
	375.499	70.0621
	94.7579	244.229
	64.3163	50.5414
	74.4043	173.705
	625.225	70.097
	159.069	69.6452
	92.5956	131.508
	46.3557	80.0716
	93.3847	61.4135
	118.907	79.3734
	148.579	81.2873
	291.736	51.0664
	46.3617	120.922
	55.0146	211.367
	146.763	232.268
	46.7649	118.16
	47.0821	50.951
	249.815	358.18
	46.4046	189.644
	64.8402	91.5848
	140.238	59.0357
	91.7326	59.8187
	117.573	111.017
	91.571	70.2807
	73.0357	101.021
	55.7014	483.737
	46.8324	279.216
	83.9845	269.928
	1612.68	97.9145
	162.214	308.089
	137.221	69.7566
	120.405	171.105
	323.753	71.8977
	55.2843	92.1247
	171.477	81.8622
	85.3898	60.0247
	82.3067	71.3812
	46.3556	60.1687
	55.928	100.581
	129.378	139.816
	303.36	581.743
	91.2602	90.009
	110.194	59.7816
	74.272	80.3714
	335.811	436.483
	54.7733	118.193
	146.593	291.692
	81.3017	60.1963
	56.4474	59.2357
	144.826	51.6173
	93.1588	60.115
	46.6238	51.0261
	55.0299	87.3474
	54.3	390.007
	64.4915	252.776
	46.1354	80.1659
	304.839	50.2853
	82.8998	292.935
	54.8985	164.713
	255.638	71.0264
	404.564	69.7998
	46.3853	50.1891
	100.816	60.79
	343.412	60.8498
	416.128	81.8755
	73.1214	199.973
	228.524	79.923
	84.4074	97.1509
	74.1298	50.3209
	113.43	60.1265
	85.7416	159.457
	83.3497	100.552
	46.3948	108.2
	358.205	88.9846
	136.57	69.2012
	55.2261	233.714
	65.0395	70.4744
	65.9703	183.309
	114.061	143.733
	143.953	285.076
	232.965	310.628
	47.2171	77.4947
	64.7023	110.621
	64.0253	50.4464
	245.26	90.3286
	54.8628	50.7116
	74.3627	210.945
	65.1128	60.7231
	294.389	59.6114
	194.208	50.7406
	54.5716	548.939
	53.9867	59.7788
	53.5029	121.916
	55.6761	81.7119
	46.7747	100.461
	46.3154	107.698
	233.541	50.7343
	46.5328	527.572
	132.833	273.727
	63.4638	70.4679
	54.8398	59.6252
	319.033	79.9641
	403.243	60.9905
	55.5353	704.207
	46.1501	110.359
	71.9924	102.041
	46.6748	98.1524
	157.294	99.7733
	46.0454	70.9455
	308.998	79.0422
	46.5404	161.884
	254.09	99.5463
	66.6559	59.7425
	81.6101	307.832
	46.3201	304.928
	54.9971	50.6861
	56.0562	71.6253
	90.1821	81.0213
	93.7242	60.2116
	74.3628	50.224
	55.4425	79.393
	100.571	436.886
	55.2785	167.86
	46.3152	167.217
	478.787	59.8972
	471.685	116.505
	56.1569	110.721
	184.271	69.6481
	243.608	88.843
	46.2081	70.3873
	312.763	57.1295
	47.0143	644.054
	72.9391	417.694
	65.2813	50.8776
	119.194	99.3405
	315.483	90.6378
	47.0771	51.9593
	46.0211	320.031
	157.922	61.9443
	398.098	712.983
	46.0531	131.735
	63.4537	619.051
	92.9243	90.5407
	176.545	149.994
	54.1647	89.22
	167.712	60.0489
	46.6236	378.081
	64.0011	50.6837
	46.3358	50.1494
	47.5208	393.525
	138.303	158.721
	101.178	70.8061
	248.309	168.085
	46.087	302.102
	62.2268	60.9253
	46.5305	109.786
	512.41	60.8278
	203.555	59.9995
	268.9	186.832
	287.19	59.2984
	82.8537	69.6243
	46.5816	152.558
	62.9875	80.5406
	255.751	147.546
	46.1146	89.9218
	74.7188	70.188
	419.489	59.1686
	194.76	332.452
	306.579	67.8578
	137.852	60.7265
	46.4738	59.8151
	64.7973	210.412
	55.0043	51.8644
	55.6251	80.2457
	543.043	79.4072
	65.8104	221.31
	47.6694	535.079
	84.0777	230.535
	54.0656	139.396
	64.4778	59.2357
	46.0726	201.879
	46.9666	425.881
	185.507	50.9805
	93.832	120.645
	55.8842	71.5517
	64.0067	68.9606
	73.5647	287.578
	251.433	231.831
	111.348	111.099
	46.0819	70.7266
	92.4953	82.1193
	110.279	60.6853
	229.016	331.58
	64.2789	163.228
	56.3798	162.269
	46.1474	335.616
	46.4748	59.4374
	64.3496	50.0484
	182.763	97.1384
	46.6692	345.221
	178.604	79.1913
	103.905	50.0494
	166.892	185.454
	54.8417	113.168
	46.0445	50.208
	55.9127	192.741
	54.632	109.311
	64.0261	80.4702
	405.116	180.262
	278.41	415.016
	139.474	79.2532
	46.4928	145.869
	46.1759	69.7163
	46.0454	60.0029
	73.3867	79.0826
	46.5237	162.946
	82.4445	50.5194
	53.7479	242.596
	62.5917	102.139
	516.125	297.775
	46.3919	90.194
	46.4494	109.837
	46.2294	101.618
	63.7282	279.603
	56.4	81.1389
	55.6348	268.938
	110.38	439.732
	161.613	129.774
	110.349	78.365
	55.1186	445.331
	46.9817	50.8406
	158.616	374.027
	46.1321	221.856
	92.0904	310.676
	55.6566	99.4174
	56.4125	210.796
	46.639	444.149
	55.2707	70.0846
	102.709	224.098
	46.0875	98.4944
	46.7588	253.096
	92.2862	51.6708
	127.552	61.6734
	371.826	70.7299
	63.1275	79.999
	75.179	383.958
	128.461	79.8753
	175.186	59.2073
	82.2639	51.0852
	184.375	79.9352
	55.9099	122.758
	72.6432	118.234
	148.045	61.6358
	190.515	220.732
	306.848	109.964
	130.491	50.5014
	480.606	70.7855
	362.974	219.917
	157.495	50.6861
	46.2258	108.398
	126.716	98.5698
	111.545	61.3792
	228.881	90.7763
	130.079	69.3184
	352.02	60.3338
	221.26	60.185
	46.3207	234.983
	309.976	70.8374
	223.43	325.708
	64.2291	51.1332
	64.8945	60.2225
	139.605	158.56
	157.845	79.0191
	55.5909	338.387
	374.3	60.423
	120.176	59.639
	56.9643	200.159
	157.212	264.713
	192.145	60.1786
	360.634	110.629
	109.76	182.033
	475.083	129.906
	56.3672	100.105
	93.4523	69.7017
	121.037	109.5
	91.7064	178.948
	101.96	151.311
	128.597	132.183
	179.578	110.049
	73.8461	70.099
	269.048	98.5136
	679.274	112.287
	138.431	89.1587
	129.27	50.8746
	214.125	110.921
	441.094	142.496
	93.8434	50.3747
	47.3981	70.0314
	427.946	51.6235
	676.269	69.075
	174.954	110.992
	93.3787	60.3126
	400.54	230.185
	472.988	110.311
	101.463	60.2632
	129.36	98.8492
	74.7714	89.4551
	426.455	151.143
	65.0603	128.094
	82.8423	60.159
	56.2899	98.1848
	54.4487	80.256
	47.2675	80.3191
	64.4794	60.8416
	141.387	99.6832
	53.7945	79.7066
	53.7011	70.6286
	56.0612	81.1539
	83.2442	98.5581
	73.5613	68.4834
	224.737	59.9776
	198.792	128.935
	230.317	80.1286
	46.4298	60.7736
	65.3536	89.6451
	66.0225	50.4401
	55.7903	90.3062
	55.5988	161.729
	46.5451	59.3529
	151.471	69.017
	231.551	144.233
	72.5207	70.7144
	223.77	399.823
	97.8702	80.6655
	57.0993	140.264
	46.9857	108.67
	720.992	59.5333
	55.9057	50.4833
	326.304	50.7758
	220.537	603.023
	46.9437	60.8811
	62.9024	51.4566
	54.7998	50
	99.9932	100.693
	118.398	60.7349
	47.2194	61.2823
	148.185	60.3963
	310.578	303.566
	74.4035	249.951
	507.656	122.373
	76.1257	50.0832
	433.469	50.8378
	411.68	60.3415
	102.899	79.5311
	46.2027	59.8486
	248.652	150.361
	170.219	89.8351
	55.6123	71.9985
	56.2794	69.3848
	83.5935	122.145
	84.494	60.5126
	548.043	62.2462
	54.9293	99.9683
	175.439	79.247
	99.8179	90.7111
	112.724	293.29
	238.111	81.1936
	63.5452	91.1356
	65.2667	69.9853
	569.65	70.9418
	46.8058	50.2866
	81.1529	80.3838
	47.1271	80.907
	46.3657	247.057
	321.346	60.4719
	74.241	58.4055
	191.564	50.5299
	65.4077	334.075
	101.062	99.3393
	54.712	82.0193
	46.4843	71.4084
	111.674	130.4
	287.28	327.135
	158.619	187.006
	54.8598	170.925
	55.9483	50.8847
	46.6814	259.791
	625.465	59.8735
	259.513	97.4533
	268.216	71.4656
	65.5834	101.156
	102.327	59.1667
	46.0236	51.3075
	64.2984	70.4215
	54.5271	267.491
	84.2996	81.288
	56.1112	70.3489
	544.033	69.9984
	173.481	79.9494
	54.7468	60.4728
	55.0076	273.159
	73.7352	210.814
	126.127	597.715
	75.6086	59.1809
	119.114	81.5693
	324.925	251.345
	122.873	120.642
	325.056	151.785
	449.238	50.4464
	65.4408	420.068
	99.2369	233.733
	55.1348	99.7966
	196.474	72.5606
	54.5326	511.749
	778.111	59.0373
	239.187	129.583
	55.3664	362.662
	652.321	269.516
	55.8328	119.576
	54.8066	248.047
	121.042	69.8703
	83.8765	431.301
	286.324	186.942
	329.314	130.682
	117.362	352.478
	288.479	59.9063
	467.605	80.049
	55.1771	144.276
	110.177	79.3925
	140.971	775.368
	348.242	70.4319
	112.917	230.002
	141.494	50.9248
	56.3637	118.008
	65.5739	192.18
	177.312	68.601
	64.936	50.2785
	56.0083	90.9353
	46.5761	80.8722
	54.523	118.008
	46.3899	69.42
	392.982	100.794
	72.2574	621.08
	46.3512	268.247
	54.8304	89.3758
	100.337	123.58
	430.019	89.255
	102.576	69.6858
	195.124	92.3734
	147.279	120.888
	54.3446	89.4933
	288.671	50.2856
	46.8425	69.7669
	398.929	201.639
	325.995	102.312
	156.449	58.7708
	57.0525	210.958
	240.887	50.8285
	46.4809	91.284
	109.548	79.5311
	102.156	50.4464
	55.5074	50.1983
	55.6579	202.663
	84.6856	407.468
	54.8301	70.2199
	208.981	60.1456
	64.3123	120.098
	263.469	201.462
	129.027	230.785
	56.1309	59.2846
	54.6354	61.0608
	54.7722	71.3284
	316.61	59.4167
	46.9478	80.7206
	112.969	69.5658
	65.674	70.4284
	206.835	82.3062
	159.029	100.128
	54.9262	82.5554
	111.813	159.424
	46.4776	98.2527
	73.4791	60.099
	55.1113	201.156
	47.2171	82.7486
	46.4107	70.5225
	65.2521	80.3692
	46.5846	59.7993
	139.472	50.8271
	110.284	59.7722
	84.4798	151.959
	56.6388	61.059
	101.944	103.339
	74.603	111.533
	65.3077	59.2952
	55.2538	129.33
	65.241	99.9807
	46.1795	59.3443
	120.694	79.6962
	213.872	61.9639
	224.943	128.304
	574.698	173.756
	46.6816	51.6191
	55.6348	122.262
	322.363	51.9593
	99.3494	80.6754
	162.049	79.7679
	66.6998	262.471
	47.1292	110.241
	263.595	50.5322
	91.8994	71.0864
	380.414	50.9588
	241.874	79.9841
	64.9856	70.3917
	46.7588	70.3137
	64.5613	79.7023
	126.157	71.8561
	54.5349	50.3435
	84.163	50.4875
	63.3669	148.499
	93.1928	90.7503
	112.67	60.7927
	73.8746	87.5731
	208.073	68.368
	63.3085	59.3427
	55.4953	139.598
	83.7909	60.2474
	176.875	60.3209
	245.018	139.875
	74.1468	119.72
	211.039	80.1932
	46.4392	464.15
	66.433	81.6244
	46.352	60.0789
	46.2274	79.4461
	63.7062	59.7295
	129.862	60.9087
	82.6466	50.0712
	735.606	69.8878
	210.994	79.8338
	202.4	140.288
	139.292	79.9445
	65.8929	121.684
	47.0996	120.236
	129.673	78.4495
	54.5739	81.4319
	65.4365	70.0803
	120.983	59.2942
	112.176	69.6304
	83.3043	50.2494
	281	274.745
	542.484	91.6005
	55.2867	78.0437
	473.219	100.322
	54.6143	154.138
	74.5516	50.3732
	55.7479	89.6295
	64.7893	151.816
	54.3448	58.2168
	168.606	70.2555
	92.158	80.9816
	74.1399	108.15
	74.5571	221.465
	183.739	81.6077
	141.576	71.7646
	183.256	71.3856
	55.6287	90.2766
	84.2395	203.843
	133.908	138.693
	241.769	58.9161
	46.909	110.582
	127.465	258.427
	62.85	99.6285
	83.8607	59.8186
	83.8853	59.8977
	55.8744	70.7447
	204.105	160.989
	581.406	192.353
	365.026	68.0034
	336.872	98.2149
	316.527	128.191
	55.2359	60.2388
	65.4936	231.339
	835.467	157.958
	137.877	100.115
	205.046	61.0757
	120.833	89.645
	303.22	50.795
	56.6969	50.9858
	56.7839	142.752
	424.632	89.6698
	369.836	61.3322
	55.0506	361.886
	362.703	89.9797
	139.505	139.752
	212.915	60.2811
	111.718	111.925
	46.2562	217.827
	100.413	51.3603
	46.9512	80.7006
	55.1489	119.747
	218.383	104.338
	64.7522	68.6929
	91.992	70.0772
	716.895	148.042
	46.8453	221.459
	157.081	80.4189
	53.8902	132.515
	363.52	109.369
	46.6371	50.68
	46.0411	68.7375
	371.144	123.329
	46.4298	69.1151
	402.113	89.214
	264.225	118.457
	92.9736	50.4833
	232.351	505.222
	331.194	59.7199
	56.6906	60.6488
	241.544	78.434
	154.74	92.7503
	75.7281	60.1257
	81.2063	51.9022
	102.283	168.409
	79.4553	327.829
	73.8245	121.71
	46.3579	69.3972
	46.2646	120.245
	379.708	101.991
	46.6714	89.197
	74.5852	50.0484
	99.927	80.4728
	46.6324	89.7357
	719.719	90.471
	73.0764	60.406
	240.947	271.953
	55.0072	90.8176
	204.368	272.154
	64.7542	70.0222
	64.2184	69.1316
	46.0667	50.2818
	175.198	60.3985
	46.2894	267.758
	312.507	89.6819
	55.26	51.1332
	65.4564	68.8727
	46.9942	100.687
	73.8587	147.892
	681.62	60.0347
	244.561	70.7045
	119.522	71.7536
	83.6145	347.004
	120.085	70.6943
	65.8949	90.3927
	46.8627	70.0773
	66.2899	51.0182
	258.336	59.5362
	55.5105	50.0022
	275.257	71.7865
	46.1358	145.563
	419.227	78.9918
	46.4939	126.784
	54.8758	50
	55.1445	60.0491
	55.2414	69.3067
	81.7865	71.0203
	146.4	61.7035
	65.2065	69.8843
	89.0632	109.222
	147.675	211.148
	149.188	221.54
	187.565	80.4588
	347.333	60.9832
	176.568	635.655
	54.1736	140.803
	273.127	68.621
	55.7262	50.7347
	152.363	79.2391
	105.345	211.785
	156.835	120.108
	184.982	69.8242
	46.1913	169.423
	46.3201	70.0846
	601.972	68.094
	229.46	138.428
	46.3585	80.4061
	55.7278	243.87
	65.4876	168.794
	55.9257	59.9567
	91.1444	60.056
	290.11	79.8941
	64.4775	50.1245
	63.9049	69.5985
	242.677	61.5232
	82.122	50.3428
	381.401	130.598
	130.93	79.2862
	63.4617	212.074
	54.3487	178.219
	46.2278	59.8705
	54.3879	91.6321
	388.94	161.539
	46.0698	347.078
	75.7452	89.0704
	64.8573	129.672
	54.9055	59.3892
	72.8605	50.0532
	200.687	69.5743
	90.3809	61.1561
	46.617	187.851
	236.416	127.679
	189.049	70.2257
	103.144	99.7273
	437.086	59.5722
	225.608	50.1465
	73.5069	50.0494
	74.7122	163.173
	195.523	50.1374
	100.895	51.1568
	54.8732	79.9951
	54.7565	60.7216
	73.5055	60.7771
	56.267	50.3331
	121.164	50.0494
	176.488	241.335
	46.0352	191.017
	220.195	144.081
	510.565	101.883
	47.1611	69.8373
	145.392	59.6478
	55.442	337.663
	92.2751	60.6431
	139.098	80.0664
	170.268	99.1804
	148.796	69.733
	74.4223	90.6271
	329.305	50.4464
	327.705	60.3845
	260.968	131.22
	91.1054	218.749
	404.844	167.243
	92.2292	59.9334
	270.46	59.4977
	55.6788	88.1354
	76.5268	89.9836
	93.123	51.2347
	46.0445	59.1774
	74.558	202.082
	75.3465	60.406
	149.207	98.0509
	55.5436	79.2179
	379.323	332.336
	305.448	89.3375
	120.697	59.0628
	63.664	69.8611
	184.541	194.349
	129.033	50.5885
	65.1243	110.628
	104.407	69.1949
	63.7045	81.78
	46.2679	111.175
	292.34	108.302
	46.8592	60.7245
	46.1119	50.1288
	274.177	162.014
	84.5285	50.0768
	47.3534	89.0831
	64.0967	121.528
	132.057	128.214
	46.8149	161.168
	133.31	324.858
	101.763	349.924
	294.7	120.709
	898.851	119.534
	111.025	404.038
	46.5001	101.586
	64.1824	119.674
	83.7364	164.56
	54.4414	70.8425
	47.0865	60.5467
	253.292	60.245
	102.039	102.391
	220.579	202.402
	62.1371	254.993
	195.526	59.2931
	626.055	91.0051
	412.191	604.623
	55.6508	131.167
	160.293	89.8484
	438.09	59.3673
	784.961	148.029
	289.256	58.2103
	343.514	79.9078
	129.085	129.998
	213.092	185.399
	54.4612	79.7523
	266.972	90.9694
	64.4137	80.531
	70.1116	51.2325
	296.214	81.0233
	112.772	71.7653
	46.1231	197.629
	286.997	89.6365
	234.845	159.759
	63.8385	261.159
	208.485	166.555
	75.0933	126.738
	526.89	159.296
	55.4038	101.359
	217.67	89.3674
	99.8719	77.7555
	159.341	50.2465
	332.081	70.9715
	74.3687	268.973
	66.5482	98.9502
	219.76	328.392
	104.758	210.754
	82.4682	173.506
	199.631	69.818
	302.872	59.1553
	47.3984	374.261
	369.545	50.5791
	64.921	514.295
	84.3895	87.7154
	55.587	192.776
	419.026	109.742
	46.3201	209.522
	55.7401	61.8029
	276.489	304.138
	280.904	102.368
	56.496	109.375
	196.127	139.125
	72.5236	69.7028
	118.553	62.016
	427.666	141.297
	221.022	59.8993
	55.8248	68.8617
	255.647	50.7931
	55.0279	59.8659
	46.8943	128.644
	92.5958	80.4362
	55.5189	528.794
	149.697	150.186
	55.4837	61.1868
	54.2453	121.514
	65.1716	79.4343
	120.936	51.263
	53.695	213.799
	55.3629	69.7721
	137.732	92.0446
	188.929	60.8193
	47.1628	60.5898
	53.8445	351.178
	416.754	51.0507
	361.162	110.762
	127.636	78.8773
	54.6793	70.4842
	56.2932	262.355
	139.023	260.023
	255.224	69.693
	176.338	50.1866
	521.338	106.463
	158.071	111.379
	46.0778	351.441
	56.1433	78.6963
	53.9836	59.7616
	440.478	50.3106
	55.9306	50.9038
	202.529	685.923
	46.0061	182.003
	55.2221	123.057
	66.7471	122.419
	63.2187	50.6235
	74.2854	390.565
	81.7447	150.807
	46.502	50.53
	54.6211	60.8661
	614.753	206.288
	194.891	200.691
	200.881	60.9408
	192.165	59.5337
	236.182	716.093
	388.78	69.6865
	55.2152	68.2334
	338.033	59.4362
	305.884	147.863
	47.2034	81.9865
	432.046	550.313
	64.058	51.0829
	160.211	70.6823
	94.1101	110.331
	57.4522	69.1785
	479.084	242.06
	93.185	175.602
	149.101	69.244
	412.667	58.4545
	100.9	78.5062
	64.3352	202.139
	139.597	69.7946
	261.266	89.175
	55.616	58.5341
	63.3616	60.0305
	73.3646	184.257
	66.4274	69.0824
	84.1179	769.135
	118.564	71.3226
	71.4327	61.2239
	82.38	50.3258
	599.146	425.814
	262.252	61.6884
	216.183	59.6124
	846.457	68.9102
	54.9246	545.388
	388.065	291.142
	157.216	60.8926
	95.3768	332.234
	127.872	59.3278
	83.4435	212.417
	147.75	50.9721
	289.596	59.9787
	54.3978	141.784
	305.047	82.7477
	64.9038	70.5817
	55.0021	80.6143
	54.0138	199.995
	55.0903	60.6191
	53.818	443.525
	74.4791	91.4364
	109.32	50.2617
	224.915	59.5337
	57.2299	181.935
	129.632	80.8435
	204.039	60.4455
	47.3599	91.5201
	55.4624	766.298
	177.605	91.4106
	54.0464	70.314
	120.382	71.1062
	46.2625	88.9367
	74.3149	60.0904
	54.3547	60.0895
	102.818	60.3716
	64.9234	151.556
	111.462	151.784
	64.5568	139.075
	46.9057	50.4335
	55.2108	51.315
	101.443	58.9235
	47.2697	60.1992
	406.357	69.0074
	299.925	51.1644
	63.5907	70.4562
	464.461	50.6368
	401.627	90.9911
	204.948	763.594
	427.887	208.792
	110.534	132.131
	688.036	67.5993
	71.7502	99.752
	55.1991	101.046
	56.1569	415.243
	73.8878	98.7578
	81.5802	79.0081
	433.457	81.0413
	64.5281	68.6549
	259.603	59.6272
	46.2196	79.8321
	74.0348	51.6894
	131.202	149.412
	75.3603	50.0484
	46.6555	68.5162
	130.972	50.1276
	62.6622	60.1494
	313.695	442.229
	709.568	221.451
	46.1835	79.6821
	148.479	91.0912
	159.219	60.3596
	166.258	78.867
	64.1567	59.7489
	56.2709	248.962
	64.2697	100.023
	74.0265	78.7965
	73.0913	121.106
	286.94	70.2845
	233.916	88.0644
	136.975	215.541
	326.251	172.307
	64.6072	374.491
	46.4107	58.3853
	55.7366	210.449
	294.817	70.7937
	300.118	220.059
	65.8407	59.8334
	54.1742	80.4115
	54.9233	129.422
	54.7631	300.423
	46.9954	70.3978
	363.967	50.6798
	128.912	99.8063
	46.4449	423.8
	269.258	140.423
	171.777	89.9074
	157.874	120.529
	102.093	71.8242
	399.188	50.9902
	75.9052	155.568
	128.828	199.721
	252.091	50.2091
	422.45	60.6653
	326.546	496.877
	109.774	275.183
	193.726	282.924
	209.686	80.5289
	46.5332	60.0992
	164.702	50.2261
	137.017	262.706
	429.92	51.4281
	63.5371	50.1827
	99.2296	78.4724
	275.077	50.8361
	73.6715	245.42
	146.603	111.041
	74.1954	68.9204
	449.901	180.941
	120.677	50.427
	174.106	69.4101
	46.0813	59.3213
	103.787	61.1228
	83.2582	170.841
	422.457	69.3253
	65.2944	50.4709
	839.244	51.1097
	55.7199	70.9211
	55.4913	563.231
	82.6665	60.2452
	55.4453	446.786
	437.989	79.1688
	357.127	99.1978
	248.753	101.631
	351.279	613.606
	81.4301	97.7146
	54.3874	69.8431
	185.899	50.5766
	202.171	79.6332
	302.071	99.2816
	72.1404	178.069
	459.147	138.671
	64.4588	101.669
	175.358	81.4306
	93.8265	60.3741
	211.63	262.88
	46.5406	342.019
	56.4275	51.9593
	54.8834	109.206
	131.276	90.6249
	125.911	100.029
	55.6042	50.545
	418.594	60.4513
	129.63	60.2975
	848.251	100.813
	599.255	70.0274
	64.227	60.7213
	46.8627	102.406
	111.633	70.4455
	119.026	129.921
	228.729	262.358
	149.301	118.746
	333.946	61.0401
	552.187	50.099
	300.161	50.078
	883.911	50.3455
	101.208	60.7633
	164.61	89.3911
	55.3693	60.0303
	46.4436	99.0877
	119.293	81.3278
	103.159	60.4291
	109.982	60.8175
	54.7844	627.679
	63.9622	79.5527
	92.8957	187.942
	185.314	70.8473
	47.7539	90.2041
	54.7771	70.1496
	229.724	131.876
	146.788	69.4468
	487.359	79.8277
	231.585	79.8778
	54.0753	60.0985
	368.637	69.6111
	100.933	99.6753
	111.205	60.4779
	53.6919	78.8688
	55.146	401.901
	417.58	122.601
	259.557	99.7736
	101.659	61.0734
	120.613	99.8355
	63.6593	101.054
	245.913	160.899
	853.429	50.1776
	608.694	99.2162
	46.7064	243.154
	187.381	70.7813
	47.0709	70.7235
	163.056	57.6473
	103.78	50.1465
	338.816	78.1768
	129.237	236.748
	54.3936	78.9211
	74.8901	50.5436
	55.6042	50.1327
	269.121	60.5504
	421.313	51.9113
	64.7511	129.958
	75.0113	197.499
	302.73	121.513
	91.8521	224.145
	971.625	61.3195
	85.1179	112.655
	73.7274	58.6294
	189.6	60.8845
	64.4295	100.776
	47.0418	68.865
	46.1824	319.685
	46.4495	151.71
	55.2746	90.9339
	54.8715	361.683
	157.452	298.705
	46.9975	90.8112
	65.2551	60.5245
	110.733	111.513
	552.345	100.088
	47.136	50.1349
	93.3263	89.2312
	165.66	165.507
	54.5088	109.17
	75.115	78.8517
	54.3831	340.824
	139.121	179.271
	176.802	163.744
	804.31	69.5856
	46.4994	50.1557
	83.8443	252.214
	138.29	272.477
	150.419	89.1807
	73.0996	50.5846
	65.3408	58.9604
	56.2275	51.4435
	56.3679	101.939
	56.7395	118.806
	174.418	129.392
	286.743	60.1809
	46.9526	164.74
	145.185	68.6028
	46.2082	100.817
	147.051	60.6756
	54.2955	69.9977
	54.3364	59.4669
	46.7685	72.3117
	54.7008	151.355
	671.235	71.5731
	55.7622	61.3139
	112.004	153.034
	89.9877	51.553
	56.1234	107.448
	197.936	99.6262
	129.72	70.3215
	46.3047	132.645
	65.2944	59.456
	130.623	191.525
	176.208	130.991
	168.277	118.888
	46.2274	69.3881
	66.4675	322.636
	173.362	50.1855
	46.8398	140.838
	55.5075	69.7273
	46.9097	80.123
	195.663	132.255
	159.042	76.7806
	160.947	59.8489
	46.174	58.9766
	140.457	67.4219
	204.054	81.2632
	110.683	91.7285
	46.0122	234.688
	82.5859	129.434
	111.701	69.2613
	55.8207	98.3032
	182.967	60.3375
	74.702	60.3126
	222.834	51.0302
	384.469	100.666
	92.5741	90.0165
	121.238	80.0094
	159.06	60.163
	84.235	69.0678
	177.754	51.564
	54.6565	97.4086
	136.186	137.304
	47.254	81.3628
	121.985	178.712
	55.4415	90.314
	103.018	261.686
	162.663	59.4461
	91.2581	80.825
	180.847	78.5005
	62.2368	140.646
	223.836	79.2231
	92.6237	81.1701
	117.1	89.312
	145.699	60.017
	163.132	50.5106
	175.926	194.169
	255.442	78.8959
	54.0847	70.0481
	47.2953	59.0026
	54.6735	108.501
	55.7479	80.4349
	81.6857	50.3472
	46.2278	60.8868
	75.2335	128.651
	292.207	70.9287
	331.933	59.8993
	411.026	50.283
	61.748	57.3318
	47.17	341.109
	167.098	50.6045
	307.755	50.7598
	99.9439	80.6324
	83.4196	50.1919
	137.621	89.0899
	144.225	90.315
	47.8421	90.8243
	47.2678	70.5333
	129.006	217.744
	120.564	60.5457
	187.138	59.0421
	65.6347	87.6405
	64.6702	68.659
	46.4096	70.031
	54.7258	50.5657
	56.3781	242.096
	279.781	50.7421
	327.576	50.1496
	64.3071	258.309
	82.754	372.177
	229.96	59.4398
	109.596	295.324
	80.7918	61.074
	55.41	200.977
	164.453	339.017
	247.316	78.1351
	154.958	70.1861
	366.472	163.272
	46.5378	70.1867
	204.996	59.3295
	47.5371	50.6154
	109.58	60.8661
	111.466	51.0699
	64.2646	228.53
	126.991	60.407
	194.536	436.318
	166.479	131.214
	721.962	50.3785
	137.318	132.178
	54.1258	99.3205
	101.064	50.6299
	63.7863	180.899
	300.899	70.7299
	82.7057	51.082
	46.0445	69.2484
	173.409	277.341
	75.7737	138.283
	65.1142	91.0457
	309.377	63.1945
	46.8972	181.808
	167.469	79.1639
	204.885	50.4975
	479.501	50.6756
	54.4414	161.166
	161.549	60.6934
	187.35	62.5916
	55.324	59.4952
	1293.14	91.5965
	46.3433	210.524
	317.566	58.9743
	46.3117	336.301
	63.553	60.1715
	94.2512	392.112
	73.0392	59.1853
	101.044	123.828
	183.084	198.159
	232.847	97.3225
	117.092	59.6977
	129.602	189.553
	155.609	98.7903
	444.473	112.124
	185.002	79.8675
	207.515	60.0494
	149.251	70.1407
	54.6692	70.1024
	46.1536	57.9222
	65.3645	108.218
	47.0787	59.9481
	122.065	69.5858
	63.8258	59.3565
	225.929	69.4451
	127.62	120.657
	130.709	70.9366
	218.199	50.5961
	601.344	81.7126
	46.0525	58.8117
	55.1275	68.6262
	64.1048	239.203
	112.837	79.858
	308.578	60.3481
	104.612	133.467
	55.4676	167.773
	255.525	223.724
	83.1668	79.431
	255.863	223.853
	109.588	51.8012
	55.9022	67.7779
	206.129	100.936
	105.742	50.4763
	65.3343	89.3409
	65.9757	59.8489
	110.604	91.6279
	64.5532	80.1491
	101.627	61.4698
	46.5	50.2975
	98.0518	190.748
	231.683	324.401
	46.3098	221.988
	308.333	79.8181
	102.554	60.7793
	83.7864	61.0327
	91.9787	179.417
	99.7864	59.8078
	404.322	81.6637
	56.328	90.8828
	176.887	50.2968
	130.808	50.0845
	46.7747	51.8111
	107.047	60.4694
	55.0108	69.0792
	219.299	69.0196
	83.441	70.2083
	92.5956	60.8168
	55.7406	68.9801
	171.537	58.6812
	158.01	61.462
	64.3071	98.7186
	91.4257	69.2227
	158.569	50.3254
	46.021	78.6069
	66.9236	77.486
	63.6044	90.5381
	179.343	60.1886
	316.852	70.3973
	64.6981	72.6943
	54.5055	50.2736
	64.4167	292.67
	100.989	139.466
	94.1535	277.425
	46.5105	70.9741
	277.778	170.081
	140.449	159.991
	99.9225	79.7044
	64.721	286.842
	230.282	178.981
	46.5934	81.5035
	985.181	156.569
	84.2537	60.0624
	56.2343	60.4116
	175.715	78.5936
	80.8307	99.0665
	54.3363	82.0126
	195.581	51.7997
	46.4976	72.302
	653.262	90.6257
	47.136	61.8458
	510.162	110.484
	497.456	192.087
	127.823	111.641
	137.07	159.575
	102.021	79.8479
	54.4455	61.1132
	340.312	59.7143
	647.298	88.1575
	111.387	67.8474
	82.9675	216.463
	269.291	50.3464
	180.087	111.635
	48.0089	67.9075
[truncated: 12,367 more rows]
