# Supplementary material for: Loss of Ena/VASP interferes with lamellipodium architecture, motility and integrin-dependent adhesion
Source: eLife. 2020 May 11;9:e55351. doi: 10.7554/eLife.55351 (PMC7239657; doi:10.7554/eLife.55351)
Supplement: Figure 7—figure supplement 1—source data 1. [file elife-55351-fig7-figsupp1-data1.xlsx]

## Sheet: Sheet1
Source Data Figure 7-figure supplement 1			Figure 7-figure supplement 1. Loss of Ena/VASP proteins affects cell spreading and FA formation in B16-F1 cells
Figure 7-figure supplement 1 B																		Figure 7-figure supplement 1 C						Figure 7-figure supplement 1 E				Figure 7-figure supplement 1 F				Figure 7-figure supplement 1 G				Figure 7-figure supplement 1 H
Cell area in spreading																		Spreading rate in µm²/min						Vinculin intensity in FA (%)				FA size (µm²)				FA length (µm)				FA width (µm)
																		Statistics see below dataset						Statistics see below dataset				Statistics see below dataset				Statistics see below dataset				Statistics see below dataset
Cell line	B16-F1				EVM-KO				VASP rescue				Evl rescue					Cell line	B16-F1	EVM-KO	VASP rescue	Evl rescue		Cell line	B16-F1	EVM-KO		Cell line	B16-F1	EVM-KO		Cell line	B16-F1	EVM-KO		Cell line	B16-F1	EVM-KO
Time point in min	0	7.5	15	30	0	7.5	15	30	0	7.5	15	30	0	7.5	15	30		Mean	15.7121	7.80567	13.2279	19.0301		Mean	100	92.254		Mean	0.0936	0.0838		Mean	0.544	0.524		Mean	0.217	0.209
Mean	287.98	315.386	668.838	759.343	302.643	277.05	395.016	536.813	400.928	370.949	566.393	797.766	305.218	396.273	667.955	876.122		Median	14.367	4.098	5.353	16.246		Median	100.258	93.26		Median	0.0926	0.0852		Median	0.538	0.521		Median	0.221	0.211
Median	279.361	265.216	607.188	687.897	300.162	254.815	306.611	394.184	397.304	356.533	384.823	525.439	309.106	303.283	458.043	812.913		SD	13.83	13.692	22.288	13.775		SD	13.455	12.86		SD	0.0132	0.0122		SD	0.031	0.0272		SD	0.0161	0.0235
SD	77.548	125.948	402.178	446.403	73.66	132.355	349.451	425.356	98.195	116.073	498.377	683.679	56.915	273.054	503.178	434.647		SEM	1.729	1.83	2.743	2.031		SEM	2.691	2.572		SEM	0.00265	0.00243		SEM	0.0062	0.00543		SEM	0.00322	0.00471
SEM	9.693	15.744	50.272	55.8	9.843	17.687	46.697	60.449	12.087	14.288	61.346	84.155	8.392	40.26	74.19	64.085		25 % Percentil	6.615	0.409	-1.872	8.612		25 % Percentil	90.586	87.013		25 % Percentil	0.0832	0.0783		25 % Percentil	0.526	0.51		25 % Percentil	0.204	0.197
25 % Percentil	235.054	229.646	370.054	460.124	244.623	211.965	242.959	312.019	331.156	281.649	292.466	326.996	258.352	260.848	351.541	558.306		75 % Percentil	23.485	11.156	19.872	27.139		75 % Percentil	106.427	101.225		75 % Percentil	0.0999	0.0908		75 % Percentil	0.566	0.545		75 % Percentil	0.226	0.229
75 % Percentil	320.755	357.99	933.144	1019.47	341.349	300.786	384.408	629.654	440.154	411.865	538.752	1047.55	346.965	371.094	835.378	1129.51		C.I. of mean	3.455	3.667	5.479	4.091		C.I. of mean	5.554	5.308		C.I. of mean	0.00546	0.00502		C.I. of mean	0.0128	0.0112		C.I. of mean	0.00665	0.00972
C.I. of mean	19.371	31.461	100.461	111.508	19.726	35.445	93.584	121.142	24.139	28.534	122.516	168.069	16.902	81.087	149.425	129.074		n	64	56	66	46		n	25	25		n	25	25		n	25	25		n	25	25
n	64	64	64	64	56	56	56	56	66	66	66	66	46	46	46	46			37.9137	-1.359	4.88137	11.9954			88.8792	93.2602			0.0731973	0.0782125			0.501317	0.506342			0.182086	0.196204
	332.404	511.295	1463.58	1469.82	341.14	283.729	261.68	300.37	428.506	472.188	452.219	574.947	269.584	221.741	409.785	629.446			37.1372	16.433	15.171	14.1587			89.8839	103.14			0.0912917	0.102441			0.534103	0.56005			0.201719	0.228737
	367.35	247.119	203.436	1481.46	240.046	200.108	203.852	733.036	267.92	250.863	285.393	723.051	307.858	318.259	570.786	732.62			16.1279	1.33127	7.43297	17.5424			90.8198	88.3981			0.0734649	0.0845872			0.483926	0.530537			0.191005	0.20473
	229.646	228.398	447.643	713.483	314.515	237.55	245.455	354.453	398.552	346.549	538.752	621.541	323.251	367.766	549.569	849.523			14.547	13.2851	47.1911	27.7905			85.1247	90.4838			0.0797724	0.0882695			0.508107	0.554423			0.201007	0.200288
	317.843	343.221	770.894	754.253	227.15	200.108	371.51	625.702	429.754	442.235	1552.61	1845.49	354.869	354.037	1249.74	1188.58			19.5948	2.4823	36.6241	-0.4299			106.139	90.855			0.113952	0.0856381			0.567771	0.509564			0.239744	0.202563
	245.039	217.997	602.82	832.882	254.607	254.607	231.726	329.076	413.529	364.438	418.521	1512.25	335.732	266.256	397.304	322.835			19.886	13.1186	24.8506	17.1541			95.8531	53.2191			0.0927474	0.0708813			0.551404	0.521066			0.205156	0.175852
	228.814	231.726	722.219	825.394	276.657	356.949	1145.32	670.216	366.518	363.19	508.799	1112.04	252.111	178.475	163.914	766.734			25.5439	5.8937	-4.59013	5.24193			102.87	76.4193			0.104188	0.0525534			0.561653	0.483352			0.216516	0.149827
	258.768	255.023	739.276	1025.09	217.165	169.322	229.646	393.976	437.658	355.701	292.05	299.954	256.271	216.749	216.333	413.529			36.0555	2.49617	-1.87213	13.6734			124.609	100.586			0.123874	0.0804176			0.598635	0.509775			0.230445	0.199191
	314.515	309.523	1075.84	1396.18	303.698	242.127	453.467	378.583	344.885	345.301	305.778	288.721	256.271	234.638	604.068	666.472			26.9307	-0.915267	0.915233	17.4731			100.258	96.4395			0.0998214	0.0687469			0.545174	0.565308			0.231708	0.19763
	225.902	362.358	1054.62	1033.82	364.022	312.851	343.221	336.564	407.705	339.892	390.231	435.162	304.946	263.344	597.412	829.138			-2.71803	9.49923	-3.39753	26.0432			90.9617	75.9152			0.0804609	0.0631451			0.520337	0.457637			0.194268	0.212822
	300.37	344.053	611.557	218.829	238.798	233.39	670.632	523.775	383.991	373.174	324.5	282.065	310.355	252.111	488.829	1091.65			-2.3436	82.997	-0.2496	6.90603			107.471	100.495			0.0991047	0.0989419			0.566376	0.490248			0.197914	0.180668
	420.185	322.419	523.775	349.877	564.962	1133.25	2589.34	3054.87	250.863	240.046	224.654	243.375	351.125	276.657	296.21	558.306			2.78737	18.7489	10.3729	16.0863			117.131	97.1655			0.106345	0.0783743			0.545595	0.489389			0.221291	0.179719
	256.687	217.165	239.214	340.308	383.159	319.091	828.722	945.625	541.249	661.48	1238.09	852.435	353.205	243.791	371.51	835.794			8.69493	6.29583	-5.40833	23.2835			95.4777	87.81			0.0999948	0.0684219			0.566294	0.512072			0.24352	0.183303
	252.527	236.718	223.405	513.375	310.355	279.569	547.489	499.23	545.409	563.298	562.882	383.159	292.466	259.6	507.134	990.972			-1.4977	0.526967	26.2235	14.131			102.428	112.058			0.0909823	0.0832888			0.527049	0.516911			0.222969	0.207964
	241.295	203.852	188.043	196.364	284.561	265.84	251.279	300.37	336.564	281.649	349.877	1123.27	353.205	260.848	410.201	777.135			27.9569	7.01697	22.3128	16.1695			91.3462	106.331			0.0803978	0.0871376			0.509013	0.514957			0.22192	0.216782
	245.039	230.894	658.568	1083.74	337.812	301.202	315.763	548.321	790.864	729.708	1175.69	1460.25	310.771	371.094	351.541	795.856			14.4361	11.51	-3.4946	16.3221			105.064	90.8854			0.0923203	0.085193			0.526989	0.540542			0.221932	0.21119
	272.496	208.845	189.291	705.578	438.906	362.774	652.327	784.207	350.709	265.008	275.409	245.871	320.755	289.553	380.247	810.417			30.6749	15.8367	12.0786	25.6549			76.7769	79.4529			0.080863	0.0823533			0.529163	0.523293			0.214845	0.218628
	290.801	354.869	757.582	1211.05	405.624	336.564	425.178	880.725	458.46	544.161	801.68	820.817	359.862	268.752	291.218	1129.51			23.9353	-0.305067	-4.81203	9.31897			108.714	106.915			0.0925968	0.0963521			0.523747	0.546379			0.227344	0.236793
	298.29	260.848	1248.91	1016.35	322.003	475.517	291.218	312.851	359.446	278.321	226.734	215.085	315.347	214.669	245.871	594.916			12.3976	8.65333	-2.3159	18.4854			138.589	104.813			0.120987	0.0929751			0.608369	0.544114			0.245211	0.233797
	386.071	317.843	531.68	757.998	219.661	191.788	368.598	479.261	393.56	279.569	289.137	324.083	354.453	247.535	413.945	909.015			18.1664	-0.984567	-2.31587	33.5039			92.2299	95.323			0.096274	0.104774			0.588491	0.566543			0.222814	0.254772
	437.658	525.856	2175.81	982.651	340.724	309.523	297.458	311.187	331.156	289.553	227.15	261.68	342.805	324.083	269.584	1347.92			41.0617	0.0970667	0.3883	24.6287			103.838	99.6956			0.0944154	0.0890305			0.585529	0.519235			0.225908	0.217589
	521.695	541.665	946.041	1753.55	227.566	236.302	217.997	230.478	440.154	324.083	417.273	451.803	381.911	284.977	727.628	1120.77			14.1865	0.735	6.33747	56.7458			108.522	84.6199			0.0846897	0.0908773			0.526526	0.540653			0.211113	0.235979
	203.02	207.596	739.692	628.614	272.08	257.103	242.127	294.13	588.675	442.651	529.6	778.799	452.635	430.586	869.908	2155.01			40.7704	0.568567	-5.83823	38.413			86.347	79.4647			0.0890636	0.0849358			0.537968	0.521495			0.221334	0.22915
	379.415	445.147	1100.39	1602.53	264.176	236.302	226.318	281.233	444.731	355.285	326.58	269.584	390.647	1149.06	1895.83	1543.04			19.4838	1.17873	-4.42373	23.7412			88.0933	87.9044			0.094692	0.0907388			0.54448	0.533769			0.217281	0.230996
	286.225	240.878	525.856	870.74	296.626	224.654	281.649	331.988	437.658	371.51	364.854	304.946	312.019	341.14	330.74	1024.25			28.8444	0.651767	-3.06473	8.61173			102.573	104.707			0.0840249	0.0874572			0.530394	0.554832			0.212299	0.220116
	278.321	423.929	1118.28	1143.65	369.014	357.782	377.335	388.567	299.538	269.168	207.596	207.596	336.148	403.96	497.982	594.5			9.3883	21.564	-1.56703	1.567
	232.142	203.02	200.524	513.791	307.858	276.241	609.061	954.777	344.053	330.324	383.991	297.042	258.352	207.596	297.458	305.362			-1.4422	14.7134	0.984567	10.7473		Statistics	p-value			Statistics	p-value			Statistics	p-value			Statistics	p-value
	223.405	219.661	208.429	180.139	314.515	280.817	852.851	755.917	292.05	228.398	228.398	321.587	306.194	295.378	396.888	628.614			-0.2219	-1.151	1.05393	27.1387		t-test	*			t-test	**			t-test	*			t-test	n.s.
	213.421	232.558	255.855	206.764	221.741	185.547	211.757	187.211	436.826	485.085	485.085	468.444	233.806	354.037	853.683	1047.97			16.9045	10.8028	-2.1356	7.1279		B16-F1 vs EVM-KO	0.043			B16-F1 vs EVM-KO	0.009			B16-F1 vs EVM-KO	0.025			B16-F1 vs EVM-KO	0.176
	317.011	288.721	510.463	824.146	309.523	236.302	498.398	633.606	350.709	244.623	244.623	286.641	253.359	277.905	403.544	467.196			7.30817	-1.63637	1.20647	52.9877
	376.919	386.903	756.749	596.164	363.19	238.382	393.976	314.099	480.093	465.948	465.948	516.287	426.426	1402	2153.34	2016.06			-3.00923	23.7966	-1.7473	6.25427
	351.125	272.912	265.008	260.848	337.812	293.298	346.133	1051.71	314.515	258.352	258.352	262.096	220.909	281.649	408.537	408.537			-1.37287	-0.721133	31.923	14.6302
	239.214	270.832	184.299	198.028	245.039	274.993	257.103	223.405	311.187	357.365	384.407	1268.88	289.137	335.732	483.421	728.044			8.1402	1.37287	70.4469	40.3683
	292.882	237.966	433.498	537.088	344.053	271.664	243.791	385.239	494.238	627.782	2774.05	2607.64	271.248	1125.76	1865.04	1482.3			6.67027	-1.08167	-4.20187	16.114
	315.347	259.184	721.803	515.455	237.134	203.852	232.558	204.684	457.628	399.384	329.492	331.572	331.988	582.851	1676.58	815.409			10.3313	0.499233	9.8598	31.3128
	163.498	210.509	381.495	473.436	306.61	214.669	232.558	321.587	416.857	371.51	1507.67	712.651	212.173	376.087	835.378	1151.56			3.85517	-3.70263	78.3514	33.4068
	237.966	220.909	190.539	353.621	393.144	325.332	326.996	282.065	416.025	417.689	1046.3	2766.57	346.965	311.187	282.065	1349.17			11.9676	0.277367	-2.23267	-0.138667
	311.187	245.455	220.493	670.216	256.271	201.356	284.145	264.592	377.335	312.019	342.805	310.355	321.171	216.749	228.814	317.011			28.359	13.0493	24.49	-1.04007
	279.985	299.538	1156.13	1130.76	202.188	191.788	198.86	593.668	347.381	327.828	701.418	1082.08	383.159	349.461	359.446	351.957			40.8259	0.526967	1.42837	23.0755
	488.413	397.72	382.327	1713.19	182.635	142.697	163.082	198.444	304.53	278.737	282.897	347.381	256.271	331.988	648.583	948.537			4.5347	7.849	15.5593	5.38057
	323.667	292.05	453.883	459.708	202.604	185.547	292.466	438.074	475.933	458.876	401.048	942.713	260.432	589.507	1471.48	421.849			0.2219	2.9122	27.208	42.1572
	290.801	282.481	316.179	297.458	240.878	190.539	191.372	328.244	426.426	411.865	611.557	1242.67	270.416	270.416	772.142	1535.13			23.0339	-2.73187	5.89367	4.11867
	410.617	349.461	760.078	1101.63	357.365	260.848	277.073	275.409	376.503	401.048	322.835	553.313	286.225	648.583	1377.04	409.785			5.3251	52.3359	2.08013	34.225
	361.942	361.11	389.815	521.695	465.532	420.185	391.48	2035.61	319.091	277.073	284.145	381.495	204.268	1143.65	1524.73	1231.02			8.34823	0.249633	-5.33897	30.9939
	327.828	393.56	780.463	578.275	351.957	279.985	329.076	359.446	688.521	553.313	493.822	528.352	270.832	488.829	846.195	1200.65			19.0539	15.1294	5.82433	1.71957
	450.971	605.316	1342.93	1022.59	252.111	209.261	371.926	705.994	297.874	411.449	383.575	472.604	231.31	263.344	301.618	282.897			14.2974	8.4453	8.9168	10.5948
	293.714	701.002	1400.76	722.635	442.235	348.213	376.503	695.594	429.338	298.29	411.449	696.842	206.764	336.148	432.666	524.608			20.1495	14.8937	19.8721
	249.199	689.353	1035.9	853.683	247.535	199.276	232.142	694.346	308.691	196.78	541.249	904.854							-1.46997	5.18643	26.5424
	268.336	222.573	205.932	224.237	341.557	246.703	259.6	497.15	328.66	302.45	287.889	1124.93							14.9214	4.5763	74.5794
	222.157	549.569	1172.36	669.8	257.103	250.447	258.768	394.392	433.498	480.509	2302.28	2670.88							71.1958	7.7242	18.1526
	354.453	327.412	1079.17	2490.33	309.523	255.023	324.5	541.249	502.974	482.173	861.172	1047.55							7.14177	0.318967	-0.7766
	246.287	251.279	558.722	460.54	255.855	193.036	317.843	265.424	440.987	364.438	361.526	417.689							12.6749	9.19413	1.8721
	173.482	170.986	509.215	553.729	241.295	249.199	317.427	517.119	293.714	256.687	214.669	349.877							17.5978	5.86593	13.2712
	226.734	250.863	527.936	754.669	277.489	306.194	414.777	453.467	398.552	374.006	385.239	796.688							4.88137	1.63637	8.55623
	262.928	205.1	668.136	409.369	336.98	300.37	340.724	386.071	265.84	266.672	538.752	522.527							8.4037	5.81047	53.584
	252.527	404.792	1225.61	504.638	244.207	234.638	272.08	418.521	371.926	354.869	1828.43	1979.45							18.111	3.61943	18.7072
	183.467	208.429	483.421	726.796	287.057	270.416	232.558	395.64	244.623	218.413	388.151	805.84							7.28043		-4.6179
	150.185	198.86	478.845	368.598					541.249	398.968	444.315	402.712							25.0863		86.2143
	199.692	267.088	920.247	952.281					467.196	359.862	819.153	3053.62							2.27427		12.9384
	278.737	637.766	1056.7	346.965					420.185	336.98	313.267	808.337							15.9199		25.6133
	291.634	263.344	686.025	769.23					388.151	363.19	512.543	1156.55							7.2943		2.302
	304.53	315.347	358.614	523.359					287.889	184.299	216.333	356.949							15.7396		0.4299
	189.291	193.452	188.459	661.48					396.056	359.03	334.484	408.953							28.7196		-5.13097
	307.026	248.783	842.035	1168.61					505.886	391.48	320.339	351.957							6.5593		-0.6795
	177.643	259.6	638.182	374.422					347.381	311.603	329.076	326.996									68.9631
									421.849	713.899	1460.66	2490.74									11.6487
									290.801	300.37	292.466	640.262
																		Statistics	p-value
																		Kruskal-Wallis test	< 0.0001
																		Dunn's
																		B16-F1 vs EVM-KO	**
																		B16-F1 vs VASP rescue	*
																		B16-F1 vs Evl rescue	n.s.
																		EVM-KO vs VASP rescue	n.s.
																		EVM-KO vs Evl rescue	***
																		VASP rescue vs Evl rescue	***
																		*	< 0.05
																		**	< 0.01
																		***	< 0.001
																		n.s.	> 0.05
