# Supplementary material for: Loss of Ena/VASP interferes with lamellipodium architecture, motility and integrin-dependent adhesion
Source: eLife. 2020 May 11;9:e55351. doi: 10.7554/eLife.55351 (PMC7239657; doi:10.7554/eLife.55351)
Supplement: Figure 7—figure supplement 2—source data 1. [file elife-55351-fig7-figsupp2-data1.xlsx]

## Sheet: Sheet1
Source Data Figure 7-figure supplement 2			Figure 7 - figure supplement 2. The fraction of Evl stably associated with focal adhesions is increased as compared to VASP
Figure 7-figure supplement 2 B
Relative fluorescence over time in FA
Cell line	EGFP-VASP																																									EGFP-Evl
Time point in sec	0	2	4	6	8	10	12	14	16	18	20	22	24	26	28	30	32	34	36	38	40	42	44	46	48	50	52	54	56	58	60	62	64	66	68	70	72	74	76	78	80	0	2	4	6	8	10	12	14
Mean	0	0.184	0.299	0.366	0.42	0.453	0.488	0.513	0.526	0.544	0.564	0.574	0.586	0.592	0.603	0.613	0.611	0.617	0.624	0.626	0.638	0.644	0.644	0.645	0.653	0.658	0.664	0.664	0.667	0.672	0.661	0.672	0.68	0.684	0.684	0.692	0.691	0.686	0.692	0.694	0.7	0	0.143	0.237	0.294	0.346	0.38	0.406	0.428
Median	0	0.138	0.26	0.345	0.4	0.439	0.479	0.522	0.518	0.547	0.568	0.584	0.601	0.582	0.601	0.624	0.625	0.614	0.634	0.626	0.638	0.641	0.641	0.649	0.665	0.659	0.668	0.662	0.664	0.668	0.669	0.68	0.688	0.7	0.694	0.702	0.678	0.686	0.69	0.681	0.686	0	0.126	0.219	0.284	0.322	0.374	0.402	0.41
SD	0	0.135	0.177	0.18	0.188	0.187	0.187	0.178	0.172	0.168	0.169	0.162	0.163	0.159	0.162	0.155	0.149	0.146	0.142	0.142	0.139	0.145	0.147	0.133	0.141	0.136	0.137	0.138	0.139	0.143	0.151	0.152	0.147	0.143	0.142	0.14	0.137	0.137	0.14	0.151	0.15	0	0.0978	0.14	0.159	0.177	0.171	0.165	0.174
SEM	0	0.0183	0.0241	0.0245	0.0256	0.0254	0.0254	0.0242	0.0234	0.0229	0.023	0.0221	0.0221	0.0216	0.0221	0.021	0.0202	0.0199	0.0193	0.0193	0.0189	0.0198	0.02	0.0181	0.0191	0.0185	0.0187	0.0187	0.019	0.0195	0.0206	0.0207	0.02	0.0194	0.0194	0.019	0.0187	0.0187	0.019	0.0206	0.0204	0	0.0122	0.0175	0.0199	0.0222	0.0214	0.0207	0.0218
25 % Percentil	0	0.0957	0.168	0.657	0.276	0.311	0.342	0.367	0.395	0.431	0.447	0.469	0.474	0.484	0.482	0.5	0.506	0.522	0.524	0.518	0.527	0.526	0.522	0.536	0.548	0.549	0.562	0.556	0.572	0.586	0.561	0.568	0.573	0.578	0.591	0.6	0.605	0.579	0.608	0.58	0.605	0	0.0705	0.142	0.197	0.235	0.297	0.315	0.322
75 % Percentil	0	0.304	0.467	0.496	0.597	0.628	0.62	0.675	0.649	0.666	0.695	0.705	0.704	0.721	0.746	0.756	0.723	0.722	0.731	0.751	0.737	0.755	0.748	0.762	0.758	0.766	0.762	0.752	0.758	0.773	0.77	0.786	0.768	0.776	0.776	0.776	0.768	0.772	0.795	0.78	0.788	0	0.191	0.311	0.384	0.445	0.483	0.507	0.537
C.I. of mean	0	0.0386	0.0484	0.0492	0.0513	0.051	0.051	0.0485	0.047	0.0459	0.0461	0.0443	0.0444	0.0433	0.0443	0.0422	0.0406	0.0399	0.0388	0.0387	0.0379	0.0397	0.0402	0.0363	0.0384	0.0371	0.0375	0.0376	0.038	0.0391	0.0412	0.0414	0.0401	0.039	0.0389	0.0382	0.0375	0.0375	0.0381	0.0413	0.041	0	0.0244	0.0349	0.0397	0.0443	0.0428	0.0435	0.0431
n	54	54	54	54	54	54	54	54	54	54	54	54	54	54	54	54	54	54	54	54	54	54	54	54	54	54	54	54	54	54	54	54	54	54	54	54	54	54	54	54	54	64	64	64	64	64	64	64	64
	0	0.0400004	0.0621943	0.128774	0.172413	0.204546	0.24322	0.283619	0.30082	0.350693	0.35327	0.370737	0.393726	0.428275	0.471617	0.449932	0.434503	0.435818	0.541376	0.534866	0.570766	0.567397	0.523775	0.535659	0.493445	0.512527	0.514423	0.524789	0.523935	0.546251	0.536705	0.531814	0.530699	0.541968	0.521638	0.529711	0.551569	0.531686	0.536641	0.523248	0.532689	0	0.187156	0.305557	0.38239	0.385976	0.43241	0.433832	0.463092
	0	0.107878	0.243906	0.291451	0.395231	0.353914	0.426218	0.521738	0.600231	0.583199	0.602621	0.638973	0.7041	0.718905	0.693235	0.792753	0.770282	0.850668	0.808283	0.86673	0.867933	0.942975	0.952244	0.840307	0.886121	0.877474	0.912856	0.974427	0.957891	1.03387	0.988622	1.05681	1.08966	1.07093	1.02959	1.10758	1.10095	1.10341	1.12875	1.16389	1.15916	0	0.115579	0.19584	0.245363	0.297758	0.31074	0.347775	0.341965
	0	0.148857	0.275883	0.334118	0.449971	0.475342	0.508596	0.523395	0.487889	0.511213	0.552992	0.478468	0.495086	0.515448	0.455485	0.467785	0.462517	0.483781	0.492443	0.503207	0.515181	0.496049	0.519758	0.542709	0.531641	0.523573	0.497882	0.555442	0.533575	0.492753	0.555679	0.527573	0.583777	0.581899	0.543118	0.589281	0.56815	0.540506	0.49748	0.448318	0.457403	0	0.116787	0.20507	0.282594	0.336621	0.373821	0.411041	0.450148
	0	0.0241682	0.0629582	0.093793	0.13098	0.157229	0.189968	0.208175	0.241185	0.267219	0.322585	0.347494	0.335139	0.340213	0.361391	0.372906	0.393039	0.401901	0.402956	0.441794	0.465133	0.503964	0.491476	0.525214	0.550471	0.56452	0.589595	0.582131	0.571918	0.557079	0.557746	0.56938	0.573189	0.578332	0.594328	0.590607	0.608639	0.616365	0.636665	0.618208	0.622809	0	0.0658672	0.138276	0.196452	0.233763	0.275815	0.322734	0.321954
	0	0.00591064	0.052374	0.129186	0.180805	0.24031	0.273575	0.324332	0.354553	0.43607	0.447395	0.469398	0.497167	0.491323	0.486394	0.516655	0.541276	0.545211	0.543752	0.559777	0.542421	0.596456	0.58916	0.61846	0.598295	0.591159	0.612515	0.609336	0.627565	0.614713	0.561386	0.551339	0.549904	0.562325	0.541814	0.56669	0.559187	0.538579	0.515777	0.478041	0.515325	0	0.110875	0.186997	0.249723	0.29517	0.327278	0.361154	0.390257
	0	0.363328	0.494034	0.54285	0.632288	0.629269	0.668551	0.646452	0.610366	0.669752	0.694627	0.689888	0.712283	0.65013	0.605376	0.662529	0.591031	0.606653	0.633036	0.56606	0.622304	0.621651	0.638896	0.604048	0.642225	0.591055	0.650441	0.575883	0.643369	0.594664	0.570247	0.567693	0.551469	0.570581	0.566841	0.592622	0.604761	0.570429	0.51009	0.558269	0.543349	0	0.182583	0.288295	0.335078	0.373453	0.378775	0.407827	0.401777
	0	0.016881	0.0432625	0.0532001	0.0717165	0.0968556	0.130267	0.124955	0.127626	0.143187	0.160485	0.163647	0.174118	0.187468	0.205965	0.248608	0.246678	0.274498	0.299666	0.300996	0.334264	0.321802	0.334377	0.359344	0.33912	0.349298	0.348031	0.375596	0.37492	0.370242	0.376177	0.372089	0.368502	0.413567	0.394715	0.423126	0.420416	0.427482	0.424401	0.459142	0.451965	0	0.0875945	0.192901	0.276312	0.314841	0.334195	0.377481	0.3806
	0	0.160631	0.380845	0.377036	0.579988	0.600172	0.592939	0.595302	0.579357	0.623163	0.722787	0.722664	0.747171	0.691735	0.745909	0.690391	0.713354	0.721788	0.727422	0.823075	0.74734	0.669981	0.595212	0.674777	0.695131	0.648383	0.688624	0.707758	0.726677	0.685902	0.700831	0.665047	0.708388	0.760623	0.764144	0.732779	0.679515	0.695993	0.638325	0.644878	0.703881	0	0.131265	0.179105	0.252939	0.316631	0.342104	0.425858	0.41405
	0	0.317198	0.516991	0.581462	0.652218	0.687143	0.714674	0.72834	0.764053	0.795285	0.793377	0.756851	0.808423	0.768312	0.781649	0.772342	0.794771	0.821399	0.836672	0.807548	0.859353	0.874253	0.880858	0.86218	0.876316	0.884503	0.880126	0.868722	0.909906	0.896273	0.884589	0.857014	0.86661	0.886742	0.872149	0.878261	0.851919	0.864497	0.905615	0.886269	0.869682	0	0.00882444	0.0332404	0.0480088	0.0631118	0.0763568	0.09251	0.11951
	0	0.365167	0.547079	0.601113	0.615555	0.673782	0.775805	0.803011	0.819832	0.767381	0.807247	0.788644	0.797892	0.797022	0.784985	0.76207	0.810315	0.756944	0.803723	0.817322	0.841461	0.876629	0.895381	0.835278	0.813119	0.864737	0.856187	0.841237	0.880062	0.883675	0.812947	0.800391	0.834193	0.839028	0.848359	0.781151	0.800165	0.814154	0.782641	0.812451	0.772753	0	0.426432	0.568027	0.629854	0.737073	0.658526	0.596028	0.67263
	0	0.140464	0.167955	0.249303	0.286428	0.311416	0.342132	0.385993	0.394599	0.399865	0.409371	0.442855	0.43887	0.447272	0.448292	0.484954	0.466849	0.476566	0.473113	0.493524	0.505484	0.496676	0.522195	0.551765	0.565715	0.518289	0.581962	0.544908	0.576941	0.609196	0.61692	0.606424	0.61859	0.607715	0.64266	0.64281	0.65071	0.654512	0.681302	0.647179	0.634479	0	0.0490315	0.0791026	0.130254	0.188263	0.229678	0.261429	0.300585
	0	0.0991549	0.151649	0.216265	0.249041	0.306816	0.333795	0.367259	0.384323	0.399897	0.434757	0.47167	0.474408	0.499715	0.532969	0.553746	0.559635	0.57523	0.584585	0.629793	0.67449	0.671063	0.668266	0.692467	0.694054	0.688904	0.684873	0.698347	0.726155	0.73141	0.732077	0.786094	0.818412	0.812592	0.836847	0.839882	0.843665	0.856827	0.885351	0.887263	0.904855	0	0.0936585	0.189952	0.24948	0.296163	0.331555	0.382781	0.442752
	0	0.0884286	0.153537	0.223896	0.249034	0.294552	0.290858	0.349817	0.378937	0.404381	0.429993	0.48529	0.526702	0.545225	0.540008	0.563331	0.610208	0.591403	0.647376	0.626984	0.654592	0.67923	0.701533	0.682662	0.724453	0.755818	0.714561	0.738094	0.724657	0.706123	0.70475	0.699347	0.732033	0.760606	0.771434	0.775094	0.757195	0.772315	0.850402	0.852736	0.854385	0	0.127594	0.242563	0.259871	0.310196	0.384491	0.368309	0.363671
	0	0.0243236	0.0575601	0.280162	0.261966	0.248054	0.261058	0.24831	0.288002	0.295123	0.308633	0.317827	0.340183	0.358573	0.340715	0.341375	0.327993	0.355943	0.366355	0.369413	0.38873	0.394344	0.400477	0.397614	0.414159	0.436486	0.422189	0.431641	0.434296	0.450969	0.444953	0.447128	0.438724	0.441064	0.428164	0.45071	0.459174	0.461983	0.490382	0.463438	0.481178	0	0.0140242	0.0786018	0.0860819	0.137413	0.138831	0.160868	0.192167
	0	0.21006	0.315208	0.343005	0.398924	0.437988	0.483457	0.464981	0.493426	0.511113	0.497179	0.546366	0.506855	0.573127	0.57562	0.624282	0.5581	0.588437	0.549655	0.603775	0.623309	0.56669	0.564115	0.601671	0.633545	0.584676	0.545568	0.548086	0.576427	0.586345	0.6314	0.670623	0.625086	0.617554	0.604934	0.606968	0.634001	0.606539	0.608051	0.64681	0.652303	0	0.00208358	0.00771016	0.0164062	0.012126	0.0237559	0.0237614	0.0315016
	0	0.135176	0.224212	0.26647	0.318451	0.390936	0.414764	0.459419	0.461728	0.482994	0.516325	0.524298	0.512433	0.515772	0.532073	0.546584	0.537663	0.524257	0.53363	0.550274	0.55535	0.537026	0.513693	0.524556	0.522334	0.520986	0.512387	0.506811	0.50015	0.514745	0.500671	0.495184	0.498372	0.504907	0.53407	0.528083	0.511572	0.529427	0.543887	0.563332	0.578835	0	0.00792451	0.00578701	0.00670313	-0.00059393	0.00466269	0.00254295	0.0147162
	0	0.120772	0.285098	0.365181	0.421657	0.350951	0.406076	0.520306	0.478096	0.512131	0.512925	0.536397	0.639515	0.540484	0.559758	0.571142	0.66043	0.570761	0.60737	0.512832	0.521925	0.610177	0.558551	0.505123	0.547003	0.522754	0.617809	0.658007	0.566037	0.638685	0.641846	0.616335	0.607302	0.626877	0.591563	0.639976	0.648596	0.641387	0.713777	0.635284	0.699862	0	0.153731	0.237121	0.317944	0.392161	0.432113	0.481521	0.481902
	0	0.293093	0.467118	0.57414	0.580128	0.648041	0.641983	0.674541	0.656281	0.666345	0.668748	0.705008	0.684168	0.68915	0.711642	0.772181	0.735834	0.716049	0.754228	0.758452	0.736785	0.755427	0.721097	0.763023	0.784426	0.797064	0.804553	0.817101	0.760639	0.725341	0.722218	0.736866	0.733147	0.763098	0.721715	0.732439	0.714986	0.728771	0.719382	0.69488	0.673441	0	0.032894	0.0652699	0.105046	0.146322	0.183628	0.207495	0.228557
	0	0.037515	0.0748918	0.114837	0.115633	0.160704	0.1783	0.202158	0.233073	0.245704	0.260289	0.264207	0.295158	0.311533	0.315028	0.340612	0.371914	0.380511	0.401889	0.432094	0.444504	0.448001	0.4832	0.491469	0.493773	0.499879	0.527123	0.556487	0.56533	0.587296	0.588408	0.631859	0.633604	0.684998	0.691002	0.705079	0.751371	0.753209	0.803831	0.875815	0.900484	0	0.116474	0.215838	0.283769	0.3635	0.40308	0.44981	0.449982
	0	0.119848	0.2595	0.298542	0.36187	0.386353	0.410695	0.440742	0.495355	0.497903	0.511535	0.518301	0.533646	0.546046	0.579152	0.616782	0.571381	0.570326	0.52947	0.552011	0.549439	0.526053	0.544519	0.563638	0.585551	0.604637	0.572073	0.558638	0.605476	0.593708	0.562277	0.624568	0.657591	0.60157	0.613522	0.62444	0.612438	0.675582	0.657245	0.663905	0.659813	0	0.160124	0.34921	0.401086	0.456001	0.483986	0.488335	0.573902
	0	0.109246	0.216788	0.269113	0.275506	0.370885	0.407724	0.505898	0.502615	0.516337	0.577792	0.534936	0.554464	0.577584	0.655987	0.623631	0.628906	0.635394	0.595562	0.54821	0.65676	0.649571	0.698383	0.6357	0.672526	0.620968	0.683714	0.626386	0.687479	0.702704	0.646035	0.672763	0.726017	0.730291	0.731454	0.720021	0.752707	0.754117	0.710728	0.683722	0.728422	0	0.0893397	0.181153	0.244625	0.289907	0.330594	0.375944	0.406224
	0	0.316049	0.496619	0.611546	0.640829	0.675781	0.798382	0.773896	0.777903	0.716118	0.715625	0.701378	0.764059	0.832054	0.850131	0.755727	0.731175	0.761117	0.858419	0.797755	0.793358	0.871791	0.830629	0.848668	0.830707	0.886964	0.894267	0.936295	0.896968	0.885332	0.9216	0.88586	0.860221	0.835497	0.931848	0.960748	0.962227	0.917134	0.843715	0.86561	0.973798	0	0.016664	0.0400206	0.0643313	0.0951213	0.127634	0.154406	0.166926
	0	0.135042	0.223834	0.291619	0.341526	0.383527	0.398014	0.418939	0.415009	0.430715	0.45044	0.463529	0.490971	0.507264	0.520059	0.499992	0.511912	0.522984	0.507738	0.522214	0.527179	0.521238	0.520488	0.557128	0.547808	0.551855	0.579647	0.588348	0.574493	0.612849	0.623962	0.603452	0.623608	0.632679	0.624394	0.631326	0.665432	0.664893	0.643469	0.647014	0.622676	0	0.219523	0.332765	0.332298	0.448938	0.493612	0.500358	0.537855
	0	0.190254	0.270643	0.339248	0.371088	0.390269	0.448337	0.471738	0.532691	0.557854	0.549812	0.598105	0.583838	0.578315	0.586467	0.611801	0.648214	0.630795	0.634269	0.62036	0.621494	0.614038	0.628761	0.606947	0.670313	0.655017	0.659653	0.64923	0.634344	0.659872	0.671657	0.681899	0.672973	0.639252	0.660918	0.697841	0.676408	0.717282	0.700917	0.720897	0.703796	0	0.0650135	0.117522	0.157915	0.210994	0.243314	0.287757	0.317462
	0	0.0206557	0.0266705	0.0406986	0.0968785	0.112669	0.14985	0.185432	0.18008	0.207669	0.243117	0.267305	0.247529	0.284492	0.289112	0.315295	0.329034	0.360641	0.344796	0.386492	0.3775	0.395262	0.408544	0.404373	0.398288	0.402794	0.418348	0.429584	0.407269	0.403517	0.423217	0.407671	0.383534	0.406797	0.386171	0.402888	0.436522	0.472854	0.434262	0.435007	0.417636	0	0.0636604	0.105576	0.148877	0.183713	0.22329	0.259215	0.280816
	0	0.120916	0.226095	0.326226	0.375864	0.419681	0.426101	0.47198	0.441308	0.487386	0.557393	0.570202	0.62011	0.65959	0.686858	0.650155	0.649784	0.653716	0.644953	0.632865	0.67144	0.67608	0.690615	0.649288	0.638318	0.688216	0.658801	0.663826	0.659447	0.639749	0.622702	0.663373	0.654999	0.642001	0.632762	0.648485	0.692195	0.635953	0.628817	0.638766	0.616456	0	0.106186	0.223968	0.285369	0.326797	0.391182	0.418725	0.419375
	0	0.241436	0.371992	0.484937	0.568312	0.586392	0.619951	0.68936	0.704441	0.695592	0.724753	0.676164	0.688583	0.720952	0.789456	0.770998	0.714131	0.711151	0.726621	0.703293	0.750357	0.777917	0.793	0.767088	0.805337	0.825535	0.817553	0.791563	0.740078	0.743104	0.759784	0.725277	0.757703	0.738823	0.69751	0.699541	0.649169	0.669963	0.65478	0.638162	0.605426	0	0.101911	0.203471	0.308514	0.298174	0.357884	0.43617	0.453132
	0	0.206787	0.3718	0.496021	0.620516	0.660333	0.796776	0.769389	0.78895	0.83861	0.848695	0.860902	0.862387	0.833335	0.873242	0.847074	0.846834	0.871349	0.829305	0.862088	0.890704	0.881002	0.915977	0.871363	0.942418	0.930755	0.944478	0.950566	0.937654	0.905563	0.909413	0.910352	0.935175	0.936686	0.925455	0.93307	0.91977	0.878425	0.866834	0.933518	0.901072	0	0.25895	0.431683	0.543864	0.63078	0.683028	0.747926	0.759312
	0	0.206566	0.369769	0.470006	0.512419	0.568346	0.61261	0.624622	0.635363	0.6579	0.69401	0.732927	0.757352	0.741492	0.773534	0.789679	0.770318	0.774278	0.780849	0.793936	0.787472	0.792418	0.807927	0.820088	0.801078	0.80364	0.807802	0.845731	0.869488	0.853502	0.867599	0.886078	0.892619	0.907416	0.927919	0.942108	0.931146	0.919649	0.923029	0.979882	0.997013	0	0.409216	0.581812	0.748323	0.86499	0.788346	0.709446	0.852638
	0	0.433841	0.598891	0.700875	0.749038	0.773739	0.784065	0.766895	0.792046	0.864786	0.854644	0.834797	0.879527	0.852437	0.861304	0.908713	0.805228	0.782909	0.761123	0.75052	0.770986	0.753539	0.748378	0.69468	0.752554	0.725903	0.762337	0.7739	0.713785	0.767732	0.742947	0.742877	0.732381	0.843069	0.815421	0.842989	0.87034	0.814144	0.855444	0.916996	0.901304	0	0.104098	0.167533	0.284011	0.311111	0.408106	0.402863	0.415843
	0	0.125762	0.308162	0.410272	0.493451	0.565411	0.570079	0.541636	0.584911	0.653038	0.705879	0.75773	0.700386	0.727141	0.738093	0.772475	0.782653	0.806382	0.8326	0.774616	0.763252	0.79203	0.843002	0.765802	0.757757	0.798839	0.778294	0.798957	0.832157	0.840498	0.801456	0.912566	0.845818	0.814145	0.804257	0.765014	0.766563	0.759504	0.752539	0.750467	0.719791	0	0.123802	0.2385	0.257375	0.340238	0.451849	0.483921	0.510079
	0	0.156664	0.250369	0.330335	0.372444	0.454064	0.517514	0.589801	0.579824	0.587644	0.620736	0.686677	0.687797	0.757309	0.691726	0.709799	0.678156	0.662731	0.6646	0.667555	0.677024	0.713871	0.715045	0.749021	0.718395	0.78568	0.745842	0.723388	0.829513	0.798628	0.758427	0.82608	0.907208	0.873426	0.843436	0.824892	0.808856	0.783839	0.814287	0.779619	0.833671	0	0.351296	0.586082	0.561722	0.714578	0.685954	0.77104	0.713008
	0	0.134537	0.259663	0.346043	0.372085	0.355722	0.452416	0.558323	0.50266	0.531155	0.455975	0.47006	0.454219	0.450078	0.393483	0.393514	0.426964	0.402591	0.448491	0.37388	0.4351	0.463455	0.419443	0.420378	0.368531	0.458698	0.434479	0.457481	0.452012	0.389624	0.268703	0.274846	0.50302	0.484769	0.470195	0.467475	0.563359	0.514748	0.489272	0.532018	0.530416	0	0.326954	0.459999	0.59181	0.572714	0.681529	0.634391	0.661877
	0	0.120698	0.218887	0.352311	0.464965	0.497243	0.48995	0.49056	0.499136	0.535721	0.493367	0.49253	0.557884	0.500129	0.493067	0.566342	0.523337	0.586281	0.534217	0.564441	0.619739	0.525531	0.443394	0.478996	0.45269	0.527941	0.456804	0.445842	0.450552	0.424345	0.261649	0.41169	0.399196	0.423705	0.469872	0.500192	0.451659	0.40437	0.607169	0.532869	0.58035	0	0.0262604	0.0537633	0.0805811	0.115743	0.151935	0.176162	0.199019
	0	0.169461	0.244339	0.347952	0.418389	0.453589	0.473732	0.505839	0.565998	0.59545	0.618486	0.666145	0.690764	0.69876	0.702898	0.681437	0.693788	0.679058	0.709893	0.730055	0.695385	0.682989	0.70026	0.707048	0.696036	0.718664	0.741784	0.735363	0.704321	0.707182	0.686376	0.697808	0.682443	0.704118	0.680309	0.67829	0.67438	0.665203	0.660908	0.677543	0.660165	0	0.047684	0.0881656	0.121863	0.15528	0.193504	0.239714	0.258392
	0	0.0406154	0.0890268	0.157916	0.210371	0.276476	0.318943	0.353209	0.375428	0.401189	0.430114	0.436131	0.452232	0.479612	0.477583	0.473766	0.46792	0.472791	0.574554	0.568314	0.564693	0.590485	0.598707	0.600381	0.606824	0.621795	0.630642	0.612741	0.638026	0.668248	0.681128	0.698771	0.732832	0.746462	0.729929	0.749498	0.743822	0.751197	0.770464	0.776562	0.792081	0	0.0743123	0.136839	0.183994	0.21131	0.242128	0.280369	0.280269
	0	0.304715	0.429916	0.413805	0.467754	0.470546	0.528705	0.610131	0.614313	0.602586	0.660739	0.676876	0.639793	0.672414	0.674446	0.733044	0.67442	0.716475	0.711282	0.747599	0.708059	0.775174	0.735177	0.745846	0.758834	0.759145	0.72403	0.666028	0.709505	0.773021	0.802602	0.808965	0.76519	0.74017	0.732073	0.775787	0.77313	0.719501	0.794935	0.792091	0.775544	0	0.125015	0.213574	0.207338	0.275043	0.310113	0.34681	0.365381
	0	0.304081	0.555236	0.605411	0.772086	0.704156	0.715188	0.709313	0.750553	0.711262	0.673795	0.719575	0.78636	0.790558	0.766423	0.742969	0.722278	0.810515	0.769653	0.758523	0.731416	0.781152	0.782472	0.803401	0.772889	0.83189	0.857617	0.751638	0.708693	0.775304	0.772036	0.774676	0.721891	0.752721	0.797731	0.731602	0.743655	0.735725	0.726574	0.733655	0.783973	0	0.286175	0.474897	0.579443	0.584576	0.61581	0.674909	0.751281
	0	0.360652	0.481957	0.496221	0.534743	0.555026	0.582799	0.587209	0.573476	0.661515	0.671233	0.609523	0.601348	0.620672	0.612939	0.645285	0.628049	0.608731	0.621408	0.629874	0.627392	0.658094	0.669805	0.718877	0.740883	0.736643	0.726332	0.685032	0.669801	0.690613	0.666645	0.698281	0.71161	0.725037	0.764837	0.721057	0.665909	0.745537	0.761419	0.771945	0.749096	0	0.331931	0.463622	0.597818	0.694454	0.735703	0.727159	0.792448
	0	0.310716	0.430538	0.468993	0.62276	0.620574	0.615085	0.69566	0.648746	0.643999	0.681058	0.719697	0.692539	0.695171	0.722155	0.770975	0.759033	0.767849	0.781354	0.828597	0.834297	0.883765	0.818266	0.849065	0.895297	0.765964	0.776747	0.783037	0.811404	0.796792	0.754625	0.773646	0.768093	0.730566	0.738559	0.75586	0.796524	0.753445	0.732089	0.775915	0.788467	0	0.0773744	0.145182	0.214594	0.267665	0.326739	0.362805	0.404376
	0	0.0527456	0.09737	0.159975	0.220808	0.250615	0.283794	0.312307	0.328521	0.349241	0.368639	0.392655	0.400556	0.390049	0.405468	0.42916	0.439458	0.453732	0.442798	0.456171	0.458685	0.468705	0.487339	0.503581	0.498218	0.503919	0.510552	0.526135	0.540192	0.535026	0.53413	0.547565	0.551201	0.574279	0.590572	0.596067	0.563109	0.578756	0.585211	0.56577	0.585478	0	0.0671701	0.160383	0.229594	0.262003	0.331535	0.308205	0.29514
	0	0.028371	0.0578844	0.0850592	0.147648	0.193526	0.232781	0.282459	0.300721	0.335441	0.345073	0.381418	0.421206	0.422544	0.480011	0.462127	0.48809	0.488492	0.523513	0.489026	0.476132	0.486126	0.487518	0.516489	0.523097	0.548536	0.543707	0.52447	0.534917	0.551075	0.555552	0.563613	0.56551	0.582581	0.584661	0.600193	0.605743	0.639187	0.63913	0.632026	0.637496	0	0.136604	0.176145	0.307217	0.356521	0.287296	0.293236	0.321821
	0	0.0956889	0.183581	0.256728	0.344191	0.423834	0.446628	0.487231	0.498888	0.513221	0.541583	0.550742	0.558936	0.575015	0.585683	0.57902	0.595657	0.607959	0.615919	0.626006	0.626949	0.632137	0.645453	0.651734	0.651255	0.663825	0.66964	0.661861	0.669405	0.667506	0.675644	0.698253	0.693683	0.695258	0.707248	0.712099	0.709346	0.706946	0.699049	0.699975	0.698978	0	0.0590232	0.145753	0.187729	0.236314	0.343208	0.354233	0.405022
	0	0.404582	0.529673	0.614812	0.620741	0.676185	0.710821	0.724503	0.735023	0.742423	0.765154	0.737087	0.740529	0.747597	0.760185	0.780938	0.793025	0.794195	0.78958	0.799497	0.828371	0.802039	0.793112	0.802702	0.798526	0.777861	0.826096	0.823921	0.79553	0.789462	0.783649	0.799091	0.788907	0.801721	0.785847	0.800816	0.798817	0.789289	0.801918	0.800602	0.781918	0	0.033139	0.0454868	0.0609111	0.104842	0.117237	0.173155	0.153128
	0	0.104771	0.193946	0.274952	0.279292	0.334068	0.361406	0.349412	0.471318	0.474245	0.471978	0.46118	0.447041	0.443728	0.428931	0.472629	0.505898	0.491964	0.512324	0.512172	0.513681	0.499436	0.551111	0.513086	0.548457	0.548056	0.551333	0.517177	0.514473	0.51955	0.524412	0.52713	0.528249	0.506415	0.52584	0.524009	0.521999	0.507569	0.560812	0.5326	0.612111	0	0.15271	0.247698	0.310316	0.342643	0.365049	0.401503	0.397022
	0	0.154357	0.245918	0.300214	0.336866	0.369076	0.461995	0.524154	0.467064	0.466491	0.46928	0.478691	0.499804	0.483825	0.511955	0.529165	0.511205	0.532021	0.474681	0.514799	0.520754	0.477051	0.458799	0.51105	0.477069	0.559127	0.562332	0.641607	0.615095	0.571837	0.52225	0.495782	0.507949	0.571504	0.609075	0.657922	0.622501	0.573962	0.621731	0.610961	0.667719	0	0.184298	0.265061	0.301032	0.357548	0.383874	0.385985	0.404984
	0	0.290977	0.537294	0.671765	0.642266	0.808517	0.793914	0.743653	0.782544	0.799889	0.869719	0.881761	0.869645	0.857075	0.90097	0.886614	0.929916	0.885631	0.830376	0.820073	0.881488	0.841666	0.849022	0.768479	0.734504	0.679118	0.692817	0.70921	0.828321	0.853326	0.811121	0.820642	0.778607	0.771454	0.775514	0.778388	0.732106	0.658988	0.661658	0.727394	0.652292	0	0.18336	0.316488	0.368359	0.441591	0.533731	0.597518	0.604104
	0	0.482019	0.675116	0.659915	0.695856	0.706325	0.733899	0.732669	0.66457	0.718911	0.736054	0.684815	0.647538	0.647321	0.770885	0.680381	0.704439	0.697328	0.730636	0.700844	0.692867	0.674292	0.610779	0.648814	0.642809	0.630602	0.692642	0.623519	0.582648	0.620512	0.606918	0.603708	0.615821	0.558599	0.562831	0.610078	0.586044	0.532253	0.499986	0.477486	0.509374	0	0.267751	0.434416	0.541733	0.550728	0.599821	0.541312	0.609618
	0	0.449298	0.581941	0.63226	0.654296	0.694513	0.696913	0.705424	0.727811	0.75395	0.751915	0.727364	0.725582	0.7519	0.750852	0.723842	0.722526	0.751464	0.724345	0.732425	0.732818	0.709128	0.733092	0.734184	0.730221	0.749849	0.734621	0.742797	0.757762	0.749525	0.770463	0.748968	0.749952	0.733115	0.748971	0.751245	0.76402	0.782099	0.766807	0.750158	0.750303	0	0.20107	0.337068	0.406164	0.430575	0.442449	0.488285	0.513972
	0	0.00342227	0.3686	0.471452	0.486146	0.529797	0.554761	0.556138	0.588779	0.582798	0.626128	0.603419	0.600805	0.585017	0.622874	0.632503	0.644827	0.655629	0.674177	0.668127	0.692495	0.696323	0.695818	0.69026	0.674851	0.688064	0.67838	0.731267	0.723976	0.729512	0.785991	0.786587	0.801302	0.775885	0.769173	0.790473	0.780196	0.803282	0.808263	0.775464	0.755647	0	0.194808	0.280523	0.361604	0.438097	0.482493	0.501765	0.498027
	0	0.132366	0.24459	0.34658	0.40135	0.440008	0.529369	0.522299	0.580314	0.565081	0.5942	0.603002	0.625971	0.605484	0.62117	0.611098	0.621565	0.620162	0.646786	0.614252	0.619047	0.624147	0.642277	0.657178	0.677456	0.664803	0.666898	0.66194	0.619721	0.64018	0.633297	0.626784	0.613397	0.614692	0.605148	0.610064	0.589352	0.613038	0.617262	0.63959	0.622242	0	0.312617	0.389769	0.407505	0.438807	0.464066	0.519551	0.535543
	0	0.0435357	0.0661205	0.105853	0.14129	0.187501	0.229744	0.227311	0.304849	0.313839	0.349762	0.384676	0.409797	0.429102	0.481977	0.50072	0.499553	0.52212	0.523075	0.517713	0.530188	0.553516	0.582446	0.586535	0.624663	0.639731	0.65797	0.672456	0.686242	0.714917	0.721481	0.740969	0.753678	0.786836	0.786118	0.759656	0.767778	0.797553	0.80002	0.761761	0.805692	0	0.235377	0.41656	0.487015	0.585438	0.547443	0.51131	0.548466
	0	0.420256	0.535718	0.570217	0.596561	0.627935	0.610931	0.634755	0.626003	0.608165	0.627131	0.654876	0.623459	0.642151	0.596498	0.635924	0.620275	0.649212	0.644144	0.634203	0.648987	0.629264	0.626239	0.642739	0.660428	0.674361	0.660486	0.644985	0.657252	0.657426	0.638688	0.678115	0.654791	0.630555	0.626192	0.621021	0.616178	0.622008	0.616676	0.58003	0.577142	0	0.154474	0.237037	0.288293	0.315152	0.344888	0.376869	0.395268
	0	0.431572	0.550546	0.614151	0.683854	0.691369	0.713704	0.698932	0.724383	0.71282	0.714798	0.721017	0.726389	0.777916	0.761383	0.766406	0.75346	0.712747	0.714658	0.692788	0.717299	0.702956	0.758992	0.761858	0.793314	0.788396	0.784419	0.80768	0.78226	0.805948	0.794454	0.801388	0.813865	0.81602	0.762975	0.777133	0.758162	0.761341	0.785383	0.81824	0.801701	0	0.124843	0.204854	0.249146	0.288549	0.314837	0.341815	0.368158
																																										0	0.040223	0.0893904	0.0943212	0.104169	0.156453	0.184365	0.206014
																																										0	0.138334	0.230899	0.295384	0.396653	0.462489	0.503645	0.50184
																																										0	0.202218	0.270907	0.365852	0.459079	0.457682	0.533668	0.541985
																																										0	0.215291	0.418808	0.409796	0.584269	0.615831	0.548778	0.580018
																																										0	0.073828	0.136916	0.196916	0.217762	0.307066	0.36092	0.360694
																																										0	0.134065	0.221468	0.201189	0.271088	0.414503	0.492852	0.515887
																																										0	0.141837	0.232753	0.298264	0.348296	0.373881	0.376368	0.388252
																																										0	0.217733	0.340524	0.385308	0.451098	0.491667	0.515037	0.493175
																																										0	0.149868	0.267146	0.392001	0.456769	0.513302	0.554807	0.59743
	0	0.150944																																								0	0.150944	0.280026	0.395576	0.474706	0.507198	0.543247	0.55906
[truncated: 59 more columns]
