# Supplementary material for: Loss of Ena/VASP interferes with lamellipodium architecture, motility and integrin-dependent adhesion
Source: eLife. 2020 May 11;9:e55351. doi: 10.7554/eLife.55351 (PMC7239657; doi:10.7554/eLife.55351)
Supplement: Figure 7—source data 1. [file elife-55351-fig7-data1.xlsx]

## Sheet: Sheet1
Source Data Figure 7	Figure 7. Inactivation of Evl in MVD7 cells impairs FA formation
Figure 7 B																	Figure 7 C					Figure 7 F							Figure 7 G							Figure 7 H
Cell area in spreading																	Spreading rate in µm²/min					Vinculin intensity in %							FA size in µm²							FA per cell
																	Statistics see below dataset					Statistics see below dataset							Statistics see below dataset							Statistics see below dataset
Cell line	MVD7					MVE-KO					Evl resue						Cell line	MVD7	MVE-KO	Evl rescue		Cell line	MVD7	MVE-KO	Evl rescue	VASP rescue	Mena rescue		Cell line	MVD7	MVE-KO	Evl rescue	VASP rescue	Mena rescue		Cell line	MVD7	MVE-KO	Evl rescue	VASP rescue	Mena rescue
Time point in min	0	7.5	15	30	60	0	7.5	15	30	60	0	7.5	15	30	60		Mean	18.3261	6.30998	17.4854		Mean	100	70.1063	97.7671	87.7777	86.6742		Mean	0.753522	0.622322	0.768678	0.688356	0.720116		Mean	226.78	176.24	213.16	206.5	199.02
Mean	166.251	340.863	727.909	1075.65	1265.82	152.829	153.087	237.604	418.939	531.428	205.912	466.149	758.961	1052.09	1255.04		Median	17.277	5.513	16.007		Median	100.344	68.196	97.63	88.569	89.389		Median	0.743	0.619	0.771	0.68	0.706		Median	219.5	179	199	199.5	204.5
Median	157.778	253.047	642.967	1026.54	1199.92	151.641	148.625	186.275	370.574	467.56	183.883	381.911	661.479	946.873	1168.41		SD	10.0871	4.41175	10.8398		SD	12.5677	12.5107	21.0268	18.1896	16.5374		SD	0.0982187	0.0605568	0.110935	0.0923051	0.0673404		SD	50.8613	34.7525	53.415	49.2085	45.1001
SD	47.048	288.948	478.399	586.892	636.333	34.7154	34.8432	138.661	233.486	270.533	71.4268	317.867	442.035	562.02	710.496		SEM	1.336	0.612	1.399		SEM	1.777	1.769	2.974	2.572	2.339		SEM	0.0139	0.00856	0.0157	0.0131	0.00952		SEM	7.193	4.915	7.554	6.959	6.378
SEM	6.232	38.272	63.366	77.736	84.284	4.814	4.832	19.229	32.379	37.516	9.221	41.036	57.066	72.556	91.725		25 % Percentil	12.724	2.569	10.983		25 % Percentil	90.046	59.293	87.723	73.464	78.822		25 % Percentil	0.69	0.585	0.689	0.616	0.676		25 % Percentil	189	148	176	175	155
25 % Percentil	132.374	171.688	363.71	738.912	910.081	126.472	126.68	149.457	195.74	312.383	160.794	210.717	464.908	688.106	822.481		75 % Percentil	23.411	10.414	19.619		75 % Percentil	106.964	81.651	109.324	101.773	98.421		75 % Percentil	0.836	0.657	0.835	0.755	0.77		75 % Percentil	262	202	255	240	228
75 % Percentil	192.126	378.947	987.617	1298.62	1591.92	178.787	173.794	265.164	593.044	764.758	227.565	627.99	1006.99	1240.17	1369.97		C.I. of mean	2.676	1.228	2.8		C.I. of mean	3.572	3.556	5.976	5.169	4.7		C.I. of mean	0.0279	0.0172	0.0315	0.0262	0.0191		C.I. of mean	14.455	9.877	15.18	13.985	12.817
C.I. of mean	12.484	76.668	126.936	155.723	168.842	9.665	9.7	38.604	65.003	75.317	18.452	82.114	114.19	145.185	183.541		n	57	52	60		n	50	50	50	50	50		n	50	50	50	50	50		n	50	50	50	50	50
n	57	57	57	57	57	52	52	52	52	52	60	60	60	60	60			30.6281	11.8671	2.3228			78.1378	67.2575	92.1141	64.2402	60.6681			0.6126	0.6189	0.8019	0.669	0.7438			208	136	285	184	136
	243.895	1129.61	1584.74	1836.54	2081.58	184.299	176.083	297.146	666.472	896.326	157.673	127.304	139.368	595.748	297.042			33.1104	8.9168	19.0678			90.0462	92.416	96.1774	61.1411	66.3192			0.7104	0.7787	0.8296	0.6241	0.8317			219	197	199	172	147
	291.01	890.501	1563.84	1950.64	2277.63	172.546	245.351	399.696	513.895	707.554	220.909	445.147	673.544	1264.72	1364.98			18.1855	6.7431	28.9761			97.5822	67.7833	97.8673	64.7294	66.898			0.6818	0.6185	0.8351	0.612	0.7683			186	140	310	189	152
	185.027	577.651	860.132	1014.79	1276.16	119.815	100.99	253.671	363.294	524.399	247.535	275.825	1059.2	1855.06	1986.1			16.4659	5.2263	9.8112			82.8307	80.4906	93.5827	70.4605	62.7223			0.7525	0.7265	0.7699	0.794	0.6831			180	163	294	124	162
	150.601	361.942	826.538	930.648	1138.56	133.648	106.086	94.8537	247.327	447.227	141.449	210.925	332.404	430.586	730.124			10.9969	8.239	24.7674			88.1072	81.1182	90.1344	69.12	59.2009			0.7179	0.682	0.8709	0.7649	0.6518			247	179	244	114	130
	168.386	377.543	574.218	738.444	828.202	170.154	157.257	694.866	811.561	664.496	176.395	574.947	651.079	898.198	1662.44			1.0158	8.9948	18.3606			92.7406	60.4664	98.5723	63.7965	75.6983			0.8595	0.6168	0.7629	0.6526	0.8794			271	189	199	180	152
	193.14	210.613	188.979	190.019	254.087	131.88	118.775	154.865	491.118	671.568	124.808	812.081	843.699	1161.54	1226.44			31.0736	9.5339	25.2042			93.824	63.7813	109.836	73.4638	49.4453			0.6906	0.5204	0.713	0.8469	0.5946			177	137	184	115	134
	207.18	1461.08	1679.49	1771.75	2071.6	167.138	170.05	251.071	922.952	739.172	219.245	946.457	1266.38	1480.63	1731.5			17.5649	6.7829	6.402			100.783	77.3092	101.181	78.1841	56.8329			0.7027	0.6778	0.7061	0.9681	0.6682			198	137	199	92	167
	152.161	368.598	752.485	1058.99	1206.06	103.902	94.3337	107.126	131.672	510.879	207.18	632.774	639.014	571.202	591.302			25.2649	9.0988	19.7889			83.7977	67.2423	91.1688	48.1849	42.3822			0.6659	0.5734	0.844	0.6162	0.5795			196	133	193	182	204
	120.751	396.056	839.122	1644.13	1636.64	203.02	148.937	148.625	392.416	748.949	171.818	1057.12	1221.87	1297.58	1359.15			16.986	4.162	-0.2639			100.917	74.2526	104.476	62.8768	61.7155			0.6951	0.6023	0.8279	0.5402	0.6971			185	154	176	277	132
	182.427	172.338	217.789	1101.32	1201.58	137.704	135.208	139.784	267.192	387.423	104.422	95.686	86.949	87.781	88.589			30.297	2.1131	18.5755			116.033	85.716	87.7226	51.7872	76.646			0.7025	0.5611	0.718	0.5534	0.8488			262	139	206	217	147
	235.782	1434.77	1635.81	1795.88	2053.6	109.207	117.735	138.328	194.284	235.99	186.379	473.436	627.782	748.013	1300.91			17.8527	6.7951	17.584			103.426	73.961	94.1017	67.8699	74.4826			0.8355	0.5409	0.8154	0.691	0.7127			218	148	176	167	176
	194.908	695.594	1003.14	1118.07	1266.07	195.844	163.81	165.89	443.587	603.548	153.929	686.857	830.802	1127.01	1208.97			10.0661	-0.6951	12.8344			94.7045	72.6903	103.978	94.1984	104.82			0.7272	0.5849	0.8638	0.6164	0.6817			174	128	258	238	241
	129.176	132.608	386.383	592.212	733.14	257.312	229.75	205.724	210.509	215.605	241.295	699.338	718.475	853.267	1011.36			0.9031	0.371	21.6818			100.689	95.9649	109.049	111.665	85.2827			0.6381	0.6967	0.7722	0.7535	0.678			248	164	253	260	208
	237.342	210.509	470.004	1090.09	291.529	191.476	187.835	199.588	191.163	213.733	258.352	993.468	1316.3	1412.4	1559.26			7.8438	4.5988	18.3814			98.1641	70.6745	131.053	113.362	88.9807			0.6241	0.6477	0.9729	0.592	0.682			197	137	205	267	224
	133.44	323.772	425.178	528.144	604.068	181.803	125.328	263.24	414.153	457.731	270.416	1143.65	1220.2	1247.24	1373.3			7.2804	12.2329	14.9977			96.9198	73.8894	96.5798	108.251	104.576			0.6948	0.604	0.7865	0.5468	0.6779			180	183	185	258	265
	116.175	201.044	337.396	399.592	553.001	161.626	139.16	148.729	609.477	895.598	232.142	551.649	963.93	1099.14	1132			20.4268	3.9418	34.537			89.8353	81.6514	131.597	101.976	104.806			0.7392	0.5533	0.7527	0.5714	0.7477			151	148	177	276	239
	139.368	126.784	160.69	1026.54	1364.98	158.609	156.113	217.269	311.603	395.12	348.213	1332.11	1964.05	2145.03	2420.43			16.5613	4.5433	17.3136			84.853	82.187	98.9369	102.83	98.5241			0.7912	0.602	0.7275	0.5932	0.7236			200	210	128	274	167
	109.207	102.03	246.079	813.745	1102.88	200.316	185.027	315.035	375.671	472.916	266.256	554.561	1050.05	1124.1	1305.07			13.3371	11.2032	13.7358			101.254	86.9381	112.45	79.088	103.191			0.7441	0.6471	0.9538	0.5632	0.7696			194	217	197	187	205
	136.976	101.302	131.152	178.683	937.2	173.482	183.779	507.55	806.152	845.675	166.826	663.56	795.856	893.622	990.972			14.5799	6.8765	15.8783			96.0502	89.2872	148.736	111.53	98.4209			0.6887	0.6502	1.014	0.5944	0.7475			159	181	183	257	204
	114.407	218.725	677.289	828.41	989.203	153.825	148.313	174.315	570.994	566.418	183.883	161.418	165.162	611.141	1136.58			13.5433	12.3005	-1.0747			93.979	85.7003	117.135	94.77	87.8399			0.6058	0.623	0.8564	0.6002	0.7776			179	157	122	228	214
	122.207	125.12	410.409	739.068	934.808	175.771	168.802	349.149	783.999	913.799	213.005	173.482	252.527	634.854	148.521			19.1059	4.9646	60.386			89.8272	73.6824	107.895	91.3481	85.208			0.67	0.5342	0.7739	0.6164	0.6875			230	148	141	235	155
	169.842	174.315	642.967	1212.4	1316.2	121.791	118.567	243.895	356.221	419.665	450.971	623.205	1769.77	3112.7	4074.13			38.205	14.2107	17.7989			111.388	88.262	96.452	100.996	99.9829			0.7516	0.6272	0.7071	0.7005	0.6947			154	202	223	195	214
	203.644	377.751	1152.39	2300.1	2495.94	148.313	207.076	687.897	815.201	1000.96	217.997	492.574	933.976	1134.5	1285.93			15.1832	4.8935	14.658			108.147	82.2539	105.6	113.827	90.2305			0.7418	0.5421	0.7761	0.8733	0.8286			223	219	266	194	219
	157.049	191.06	370.782	727.732	1068.04	157.881	144.257	147.897	145.089	451.491	287.057	212.173	681.033	1042.97	1166.53			27.6795	12.037	18.5755			124.587	73.4565	94.1102	119.599	78.8219			0.862	0.5935	0.6337	0.7461	0.8439			254	198	217	235	170
	177.123	303.594	1104.44	1693.33	1837.89	159.13	160.066	454.091	727.94	881.349	203.852	1077.92	1191.91	1268.04	1318.38			12.245	6.9598	4.9299			120.376	84.0668	113.62	128.091	91.3269			0.7616	0.6393	0.7668	0.7244	0.7288			306	178	218	281	128
	125.224	133.96	369.014	784.311	859.924	119.919	122.519	267.088	496.006	537.504	170.154	189.707	336.98	370.678	465.948			26.974	2.4043	14.3945			140.132	85.1706	113.508	111.174	89.7979			0.7735	0.5207	0.6041	0.6886	0.7814			237	179	174	245	252
	147.065	119.503	299.642	1321.4	1765.51	95.2697	108.062	153.097	148.625	239.526	155.593	423.097	464.7	740.941	1019.26			18.6553	5.3442	9.3952			120.869	86.2616	116.872	97.9479	84.8699			0.7772	0.6177	0.5495	0.7664	0.8215			222	170	190	198	265
	141.553	253.047	611.349	1054.94	1260.87	80.0848	131.36	188.251	300.89	400.736	178.059	383.575	545.825	716.395	741.773			17.0778	-0.0572	8.3829			103.051	70.1	152.203	110.305	85.9599			0.5629	0.5261	0.6588	0.6945	0.7561			153	203	174	221	130
	134.168	169.738	384.615	773.598	1158.84	112.743	128.032	152.785	122.831	109.311	101.094	187.627	328.66	430.586	604.068			18.6795	0.9673	8.9445			109.568	55.4664	109.324	101.773	94.3315			0.6895	0.596	0.9871	0.7187	0.7309			228	216	218	183	160
	162.25	243.167	982.443	1167.68	1283.02	113.887	128.344	132.816	198.236	171.922	114.823	408.537	521.695	477.181	651.495			17.7244	1.6086	20.1564			87.3814	62.8706	97.3926	92.955	92.1599			0.621	0.6568	0.8703	0.7441	0.6964			213	239	130	198	182
	109.623	168.906	347.797	896.846	1173.09	184.299	185.859	198.652	277.801	280.817	217.997	242.543	595.332	1058.78	1427.38			6.353	4.8588	11.3505			106.964	64.1106	83.6495	85.5194	93.1015			0.8489	0.6616	0.8815	0.6591	0.6934			307	202	163	217	219
	171.298	148.833	168.802	221.845	552.481	117.111	109.831	97.0378	191.892	408.641	141.865	226.734	428.922	614.885	822.897			16.0742	5.6181	7.6549			89.3076	60.9105	96.6313	87.2428	96.221			0.6235	0.7526	0.9582	0.8079	0.7118			162	179	255	172	189
	174.315	382.535	953.633	999.292	1138.76	123.039	116.695	184.299	365.478	460.124	137.288	118.983	178.475	339.06	596.58			12.4981	10.4717	26.6949			111.975	67.0527	82.3997	86.6919	102.937			0.8373	0.762	0.7911	0.6937	0.8			189	234	185	201	198
	157.778	300.89	604.692	682.801	907.663	136.664	167.762	405.312	529.808	764.966	278.321	881.141	1489.37	1746.06	1880.02			31.3024	5.4083	10.9761			91.7537	60.2094	59.8742	92.238	96.111			0.6466	0.5978	0.6889	0.7394	0.7721			197	262	131	168	151
	191.787	454.299	1147.5	1874.71	2069.93	137.704	131.568	161.314	386.175	462.204	163.498	157.673	478.845	676.457	822.065			31.8328	-0.1317	14.8036			101.388	51.0507	82.6769	76.6708	84.9247			0.9054	0.6975	0.7982	0.634	0.6841			206	123	166	189	225
	267.92	394.496	1624.27	1836.75	2177.89	167.866	171.506	157.049	153.409	159.962	187.211	341.14	462.62	509.631	1075.42			20.3679	11.7527	45.1526			91.198	55.6874	77.2394	72.4818	97.2315			0.7552	0.6659	0.7562	0.6063	0.6616			236	181	312	151	268
	217.581	221.845	873.861	1175.79	1439.65	158.298	168.282	193.556	597.204	863.46	366.518	1382.45	2130.88	2202.44	3075.67			8.3829	11.3818	11.9538			104.978	56.5581	63.3331	72.5466	88.7192			0.9067	0.6214	0.679	0.6078	0.66			265	182	238	175	228
	96.2058	100.47	203.228	407.808	599.18	203.644	182.011	242.543	588.883	886.549	160.586	483.837	634.438	777.967	877.813			20.2275	2.3003	38.1634			102.436	58.9637	59.4889	84.5169	103.724			0.9618	0.623	0.6143	0.6699	0.6756			208	169	309	240	256
	147.377	360.694	763.198	1263.78	1361.03	182.739	229.334	153.929	184.299	320.755	304.946	403.128	1268.46	1895.41	2594.75			24.7015	10.4301	21.7859			89.5733	59.082	88.9087	90.3473	86.9798			0.9845	0.6471	0.6761	0.7018	0.7398			303	93	257	235	198
	225.381	338.02	1180.16	1529.1	1707.47	138.744	147.481	135.104	652.327	764.55	174.314	604.9	1156.97	1327.95	1481.46			14.3893	4.3475	10.5601			115.486	50.2798	71.3674	89.8948	104.506			0.8565	0.5934	0.736	0.6711	0.6632			315	141	325	275	284
	155.177	266.256	544.577	786.911	1018.53	101.51	137.288	183.779	292.778	362.358	143.529	340.724	502.142	739.276	777.135			12.7997	10.3972	17.1125			94.252	51.3613	71.6289	92.188	90.229			0.807	0.5703	0.7681	0.7607	0.6717			276	192	216	194	221
	142.905	178.579	394.912	762.47	910.887	144.257	186.691	515.871	678.433	768.086	222.989	210.509	465.116	1174.44	1249.74			23.3113	2.7336	10.1788			115.598	52.2781	52.0261	73.6241	81.4197			0.8668	0.5745	0.6718	0.7714	0.6515			272	129	275	128	221
	199.172	348.733	1059.41	1423.12	1597.85	139.992	121.375	122.831	168.698	304.01	156.425	162.25	478.429	699.754	767.15			24.5853	3.8014	15.6495			75.243	59.2928	67.836	85.9727	80.9153			0.9432	0.5975	0.5706	0.6433	0.6175			380	188	250	309	218
	247.223	257.832	1096.02	1571.74	1722.34	111.599	112.743	100.886	197.196	339.684	160.17	240.046	670.632	975.995	1099.14			23.7082	1.9137	17.0848			109.849	68.6095	67.0665	79.6044	95.1989			0.812	0.6203	0.627	0.6695	0.6728			291	209	308	222	224
	167.45	215.501	830.906	1291.03	1589.94	184.507	188.667	259.392	360.07	299.33	183.883	215.501	173.898	1091.23	1208.97			13.5104	-1.4613	12.9939			87.5088	58.2243	112.538	92.6863	111.494			0.7009	0.5942	0.8771	0.7554	0.7714			326	217	194	156	248
	119.607	412.385	665.952	818.113	930.232	194.492	150.393	150.185	104.734	106.814	178.059	166.826	476.349	881.141	957.69			19.8947	0.078	16.7173			100.862	63.9122	118.214	83.9291	93.9459			0.7369	0.6371	0.8037	0.6187	0.6222			227	178	163	239	265
	158.194	569.33	1100.07	1255.04	1351.87	149.457	164.642	151.849	157.881	154.137	186.379	180.971	498.398	876.981	1189.41			4.2556	6.7656	27.8737			105.391	67.2709	108.298	84.156	120.834			0.8501	0.6847	0.8126	0.7859	0.7914			227	198	158	213	232
	115.447	108.166	250.239	318.155	370.782	134.168	131.88	249.407	511.711	540.105	356.117	380.247	900.278	2038.52	2028.54			19.8825	14.8608	14.0547			106.239	49.9823	107.067	90.7343	81.5083			0.7792	0.5696	0.5706	0.7603	0.7002			283	202	258	246	150
	168.594	280.193	959.874	1166.22	1361.55	163.498	161.73	448.891	918.791	1055.14	170.154	615.717	709.739	913.175	1013.44			18.1491	11.0559	6.4068			100	58.1091	104.686	106.296	101.571			0.7623	0.6658	0.631	0.8251	0.7311			220	204	171	152	275
	139.16	294.026	883.429	1124.72	1228.11	148.833	138.848	148.729	578.067	812.185	128.552	356.533	345.301	475.517	512.959			3.9176	14.1639	32.1379
	104.318	159.858	195.116	215.189	339.372	202.396	212.277	276.969	671.048	1052.23	289.553	401.464	906.102	1226.44	2217.83			6.1693	0.1941	13.9091		Statisitcs	p-value						Statisitcs	p-value						Statisitcs	p-value
	110.871	213.525	250.759	324.396	481.029	129.904	136.664	163.498	187.627	141.553	186.379	346.965	724.3	876.981	1020.92			14.4447		18.9291		one way ANOVA	< 0.0001						one way ANOVA	< 0.0001						Kruskal-Wallis test	< 0.0001
	169.426	196.468	423.93	844.635	1036.11						161.002	170.154	619.877	1008.86	1296.75			61.6948		7.2319		Tukey's							Tukey's							Dunn's
	299.018	553.937	2397.34	3451.14	4000.7						181.387	252.111	342.805	556.225	615.301			12.4547		10.99		MVD7 vs MVE-KO	***						MVD7 vs MVE-KO	***						MVD7 vs MVE-KO	***
	155.177	181.595	220.285	561.01	902.462						179.307	188.459	452.635	732.204	838.706			17.2772		19.0817		MVD7 vs Evl rescue	n.s.						MVD7 vs Evl rescue	n.s.						MVD7 vs Evl rescue	n.s.
	163.29	594.292	896.846	1116.82	1199.92						221.741	209.261	1171.11	1233.1	1366.64			16.8906		13.1741		MVD7 vs VASP rescue	**						MVD7 vs VASP rescue	**						MVD7 vs VASP rescue	n.s.
	120.543	143.217	565.482	1009.28	1133.98						180.139	710.155	809.169	917.751	970.586					16.1348		MVD7 vs Mena rescue	***						MVD7 vs Mena rescue	n.s.						MVD7 vs Mena rescue	n.s.
											202.188	284.561	776.719	1001.79	1170.28					44.4176		MVE-KO vs Evl rescue	***						MVE-KO vs Evl rescue	***						MVE-KO vs Evl rescue	**
											396.888	808.753	1444.86	2607.64	3061.94					19.4492		MVE-KO vs VASP rescue	***						MVE-KO vs VASP rescue	**						MVE-KO vs VASP rescue	*
											165.578	274.993	652.327	1116.61	1332.53							MVE-KO vs Mena rescue	***						MVE-KO vs Mena rescue	***						MVE-KO vs Mena rescue	n.s.
																	Statisitcs	p-value				Evl rescue vs VASP rescue	n.s.						Evl rescue vs VASP rescue	***						Evl rescue vs VASP rescue	n.s.
																	Kruskal-Wallis test	< 0.0001				Evl rescue vs Mena rescue	***						Evl rescue vs Mena rescue	*						Evl rescue vs Mena rescue	n.s.
																	Dunn's					VASP rescue vs Mena rescue	n.s.						VASP rescue vs Mena rescue	n.s.						VASP rescue vs Mena rescue	n.s.
																	MVD7 vs MVE-KO	***
																	MVD7 vs Evl rescue	n.s.				*	< 0.05						*	< 0.05						*	< 0.05
																	MVE-KO vs Evl rescue	***				**	< 0.01						**	< 0.01						**	< 0.01
																						***	< 0.001						***	< 0.001						***	< 0.001
																	*	< 0.05				n.s.	> 0.05						n.s.	> 0.05						n.s.	> 0.05
																	**	< 0.01
																	***	< 0.001
																	n.s.	> 0.05
