# Supplementary material for: Loss of Ena/VASP interferes with lamellipodium architecture, motility and integrin-dependent adhesion
Source: eLife. 2020 May 11;9:e55351. doi: 10.7554/eLife.55351 (PMC7239657; doi:10.7554/eLife.55351)
Supplement: Figure 8—figure supplement 1—source data 1. [file elife-55351-fig8-figsupp1-data1.xlsx]

## Sheet: Sheet1
Source Data Figure 8-figure supplement 1			Figure 8-figure supplement 1. Inactivation of Evl in unconfined MVD7 cells diminishes cell contractile energy
Figure 8-figure supplement 1 A
Contractile force in J
Statistics see below dataset
Cell line	MVD7	MVE-KO	Evl rescue
Mean	7.35489e-18	2.09429e-18	8.02828e-18
Median	7.368e-18	1.541e-18	6.335e-18
SD	3.27392e-18	1.76882e-18	4.62908e-18
SEM	7.321e-19	4.29e-19	9.258e-19
25 % Percentil	4.783e-18	5.527e-19	4.733e-18
75 % Percentil	8.259e-18	3.421e-18	1.114e-17
C.I. of mean	1.532e-18	9.094e-19	1.911e-18
n	20	17	25
	8.0024e-18	3.3262e-18	1.0393e-17
	1.2392e-17	5.6001e-19	2.4064e-18
	7.4196e-18	5.235e-19	5.9633e-18
	3.9187e-18	3.7046e-18	6.3354e-18
	5.0121e-18	1.1839e-18	2.7648e-18
	4.851e-18	4.211e-19	8.6351e-19
	4.7156e-18	3.0805e-19	1.8517e-17
	6.4795e-18	5.3058e-19	1.5616e-17
	6.5763e-18	4.2442e-18	1.2639e-17
	8.2645e-18	1.7061e-18	5.4994e-18
	8.1743e-18	9.1824e-19	6.2968e-18
	7.3693e-18	6.0672e-18	2.5546e-18
	1.164e-17	4.7032e-18	1.0225e-17
	7.3659e-18	1.5756e-18	4.9224e-18
	4.2835e-18	3.271e-18	1.2756e-17
	2.5833e-18	1.0187e-18	2.797e-18
	4.4452e-18	1.5407e-18	4.1659e-18
	8.9339e-18		1.1112e-17
	8.2538e-18		7.872e-18
	1.6417e-17		8.3291e-18
			1.4907e-17
			5.8533e-18
			5.9452e-18
			1.0768e-17
			1.1205e-17
Statistics	p-value
Kruskal-Wallis test	< 0.0001
Dunn's
MVD7 vs MVE-KO	***
MVD7 vs Evl rescue	n.s.
MVE-KO vs Evl rescue	***
*	< 0.05
**	< 0.01
***	< 0.001
n.s.	> 0.05
