# Supplementary material for: Loss of Ena/VASP interferes with lamellipodium architecture, motility and integrin-dependent adhesion
Source: eLife. 2020 May 11;9:e55351. doi: 10.7554/eLife.55351 (PMC7239657; doi:10.7554/eLife.55351)
Supplement: Figure 8—source data 1. [file elife-55351-fig8-data1.xlsx]

## Sheet: Sheet1
Source Data Figure 8	Figure 8. Confined MVE-KO cells exhibit diminished traction forces
Figure 8 B				Figure 8 D
Contractile force in J				Contractile force in J
Statistics see below data set				Statistics see below data set
Cell line	MVD7	MVE-KO		Cell line	MEV-KO	Evl rescue
Mean	2.24214e-13	8.38792e-14		Mean	8.8569e-14	2.79873e-13
Median	1.8833e-13	7.3083e-14		Median	7.6956e-14	2.5139e-13
SD	1.54022e-13	6.22227e-14		SD	6.79668e-14	1.95226e-13
SEM	2.178e-14	9.964e-15		SEM	1.449e-14	4.26e-14
25 % Percentil	1.086e-13	3.232e-14		25 % Percentil	3.012e-14	1.723e-13
75 % Percentil	3.337e-13	1.095e-13		75 % Percentil	1.213e-13	2.974e-13
C.I. of mean	4.377e-14	2.017e-14		C.I. of mean	3.013e-14	8.887e-14
n	50	39		n	22	21
	1.3118e-13	1.642e-14			9.6084e-14	6.5243e-13
	3.0891e-14	3.981e-14			1.8319e-14	2.6726e-13
	5.0979e-13	3.6549e-14			2.3412e-14	5.2998e-14
	6.1058e-13	6.8839e-14			1.7841e-13	2.1087e-13
	6.0999e-14	5.2617e-14			3.1196e-14	6.8711e-14
	8.4131e-15	2.4536e-13			1.0629e-13	1.603e-13
	5.5613e-13	7.3083e-14			7.7155e-14	2.884e-13
	4.0458e-13	1.5881e-13			1.0419e-14	2.5139e-13
	3.3374e-13	1.0426e-13			1.9613e-13	8.681e-13
	1.543e-13	1.7259e-14			6.1227e-14	3.2435e-13
	3.1896e-13	7.4036e-14			2.5927e-13	1.7629e-13
	1.8687e-13	3.7554e-14			7.6757e-14	2.2156e-13
	4.423e-13	1.0997e-13			5.316e-14	1.2796e-13
	4.4299e-13	2.0504e-13			3.0023e-14	2.6264e-13
	5.371e-14	8.4449e-14			1.4588e-13	2.093e-13
	1.6437e-13	1.8853e-13			1.2126e-13	2.0034e-13
	2.4508e-13	4.8993e-14			3.0117e-14	3.8142e-13
	2.8105e-13	2.0461e-14			3.568e-14	5.2281e-13
	3.6054e-13	9.6084e-14			2.6004e-14	2.8818e-13
	1.9571e-13	1.8319e-14			1.8175e-13	2.6429e-13
	1.8717e-13	2.3412e-14			8.2064e-14	7.7743e-14
	9.1927e-14	1.7841e-13			1.0791e-13
	1.4442e-13	3.1196e-14
	2.8175e-13	1.0629e-13		Statistics	p-value
	1.6007e-13	7.7155e-14		Mann-Whitney rank sum test	***
	1.086e-13	1.0419e-14		MVE-KO vs Evl rescue	< 0.001
	7.5006e-14	1.9613e-13
	1.1655e-13	6.1227e-14
	1.1108e-13	7.6757e-14
	1.1903e-13	5.316e-14
	9.413e-14	3.0023e-14
	4.7593e-13	1.4588e-13
	4.8654e-14	1.2126e-13
	2.8206e-13	3.0117e-14
	2.0879e-13	3.568e-14
	1.2607e-13	2.6004e-14
	4.2482e-13	1.8175e-13
	2.8859e-13	8.2064e-14
	3.5008e-14	1.0791e-13
	1.9328e-13
	3.5022e-13
	6.6606e-14
	2.4882e-13
	5.5194e-14
	1.8949e-13
	4.0523e-13
	4.0167e-13
	2.5477e-13
	1.4989e-13
	2.3667e-14
Statistics	p-value
Mann-Whitney rank sum test	***
MVD7 vs MVE-KO	< 0.001
